# Supplementary material for: Re-exploring the core genes and modules in the human frontal cortex during chronological aging: insights from network-based analysis of transcriptomic studies
Source: Aging (Albany NY). 2018 Oct 20;10(10):2816–31. doi: 10.18632/aging.101589 (PMC6224233; doi:10.18632/aging.101589)
Supplement: STable S7 [file aging-10-101589-s007.xlsx]

## Sheet: 工作表1
Table S7. The list of primer sequences used in this study
1	GAPDH	forward	5′ -	AATGGTGAAGGTCGGTGT	- 3′
		reverse	5′ -	GTGGAGTCATACTGGAACATGTAG	- 3′
2	CDC42	forward	5′ -	TGCTCTGCCCTCACACAGAAAG	- 3′
		reverse	5′ -	GCGGCTCTTCTTCGGTTCTG	- 3′
3	HDAC1	forward	5′ -	CTCACCGAATCCGCATGACT	- 3′
		reverse	5′ -	GGCTTTGTGAGGACGGTAGA	- 3′
4	YES1	forward	5′ -	AATGAGGACCAGAGGGTAGGG	- 3′
		reverse	5′ -	CATTATCAAATCCGCTCGCTCC	- 3′
5	HRAS	forward	5′ -	CTGACACCAGGCTCAGGACA	- 3′
		reverse	5′ -	GGTCACATCTGTCCACCATCC	- 3′
6	MAPK1	forward	5′ -	ATTGGTCAGGACAAGGGCTCA	- 3′
		reverse	5′ -	GGACCAGGGTAAAGAACTGGG	- 3′
7	YWHAZ	forward	5′ -	CCAGCGACCACCCATTGTC	- 3′
		reverse	5′ -	GATGACGTCAAACGCTTCTGG	- 3′
8	HDAC9	forward	5′ -	CAGCAATAAGGAAAAGGCTGGGA	- 3′
		reverse	5′ -	CGTGGCAATGGCAGAGAAGAA	- 3′
9	CDKNIA	forward	5′ -	CGGTGTCAGAGTCTAGGGGAA	- 3′
		reverse	5′ -	GTGCCTGTGGCTCTGAATGT	- 3′
10	MAPK3	forward	5′ -	GTCTCTGCCCTCGAAAACCA	- 3′
		reverse	5′ -	AGGTCAAGAGCTTTGGAGTCAG	- 3′
11	SMAD3	forward	5′ -	AGAAGCTCAAGAAGACGGGG	- 3′
		reverse	5′ -	CAGTGACCTGGGGATGGTAA	- 3′
12	PPP2CA	forward	5′ -	GGGAATCACGAGAGCAGACA	- 3′
		reverse	5′ -	AGAAGATCTGCCCATCCACC	- 3′
13	PLCB	forward	5′ -	GTGTCCGACAGCCTCAAGAA	- 3′
		reverse	5′ -	GCTCCGTCTCCTTATTCTGGT	- 3′
14	ITGB1	forward	5′ -	CGGACGCTGCGAAAAGATGAA	- 3′
		reverse	5′ -	TCTCCGCAAGATTTGGCATTTG	- 3′
15	PDGFRB	forward	5′ -	GCAGAAGAAGCCACGCTATG	- 3′
		reverse	5′ -	CAGGTGGAGTCGTAAGGCAA	- 3′
16	NFKB1	forward	5′ -	AGCAACCAAAACAGAGGGGA	- 3′
		reverse	5′ -	TTTGCAGGCCCCACATAGTT	- 3′
17	NFKBIA	forward	5′ -	TAGCAGTCTTGACGCAGACC	- 3′
		reverse	5′ -	CGTGTGGCCATTGTAGTTGG	- 3′
18	PAK2	forward	5′ -	GCCTCACGGCCTCGGTAG	- 3′
		reverse	5′ -	GAAACAGCCAGAGAGGAAAGGT	- 3′
19	SP1	forward	5′ -	GTCAGCGTCCGCGTTTTTC	- 3′
		reverse	5′ -	ATCTTGGTCGCTCATGGTGG	- 3′
20	KAT2B	forward	5′ -	CCGTGAAGAAGGCGCAGTT	- 3′
		reverse	5′ -	TTTACAGGACTCCTCTGCCTTG	- 3′
21	STAT3	forward	5′ -	CATTGACCTGCCGATGTCCC	- 3′
		reverse	5′ -	GTGAGCGACTCAAACTGCCC	- 3′
22	HIF1A	forward	5′ -	CTGGACTTGTCTCTTTCTCCG	- 3′
		reverse	5′ -	GAACTCATCCTATTTTTCTTCTCGT	- 3′
23	ACTA1	forward	5′ -	CTCCTCCCTCCCCTCTTACTG	- 3′
		reverse	5′ -	CATGGTGTCTAGTTTCAGAGGC	- 3′
24	RAC3	forward	5′ -	ACACACCCATCCTTCTGGTG	- 3′
		reverse	5′ -	TTGACGGAACCAATCTCTCGG	- 3′
25	MAPK8	forward	5′ -	ACCAAAGATCCCGGACAAGC	- 3′
		reverse	5′ -	CTGCACCTGTGCTAAAGGAGA	- 3′
26	SUMO1	forward	5′ -	CATGTCTGACCAGGAGGCAA	- 3′
		reverse	5′ -	TGTATCTCACTGCTATCCTGTCC	- 3′
27	UBE2D1	forward	5′ -	CGGGACACGCGGACACT	- 3′
		reverse	5′ -	CCAGTGGAACAAGTCATCTCCC	- 3′
28	BCL2	forward	5′ -	TCCTTCCAGCCTGAGAGCAACC	- 3′
		reverse	5′ -	TCACGACGGTAGCGACGAGAG	- 3′
29	PAK1	forward	5′ -	CTTAGCCGAATCCAGCCTGTCAG	- 3′
		reverse	5′ -	GTCACCACCAGCAGCAGCAG	- 3′
30	KIT	forward	5′ -	CAACGGCACGGTGGAGTGTAAG	- 3′
		reverse	5′ -	AATGAGCAGCGGCGTGAACAG	- 3′
31	PRKCD	forward	5′ -	AGAAGAACAACGGCAAGGCTGAG	- 3′
		reverse	5′ -	TTAATGGCTCCACGACGGTTCATG	- 3′
32	CDK8	forward	5′ -	TCGGTACTGAGCTGTGCTGGAG	- 3′
		reverse	5′ -	GTGGAACTCGGCTACTGGACATTG	- 3′
33	GNAI1	forward	5′ -	ACGATTCGGCAGCGTACTATC	- 3′
		reverse	5′ -	TGGGTTTCCACAATCCCTGT	- 3′
34	CDK5	forward	5′ -	GCCAGACTATAAGCCCTACCC	- 3′
		reverse	5′ -	GCTGCACAGGGTTACACTTC	- 3′
