# Supplementary material for: Re-exploring the core genes and modules in the human frontal cortex during chronological aging: insights from network-based analysis of transcriptomic studies
Source: publisher site journal article supplement (doi:10.18632/aging.101589), 2018-10-20
Supplement: Supplementary file [file aging-v10i10-101589-supplementary-material-SD8.pdf]

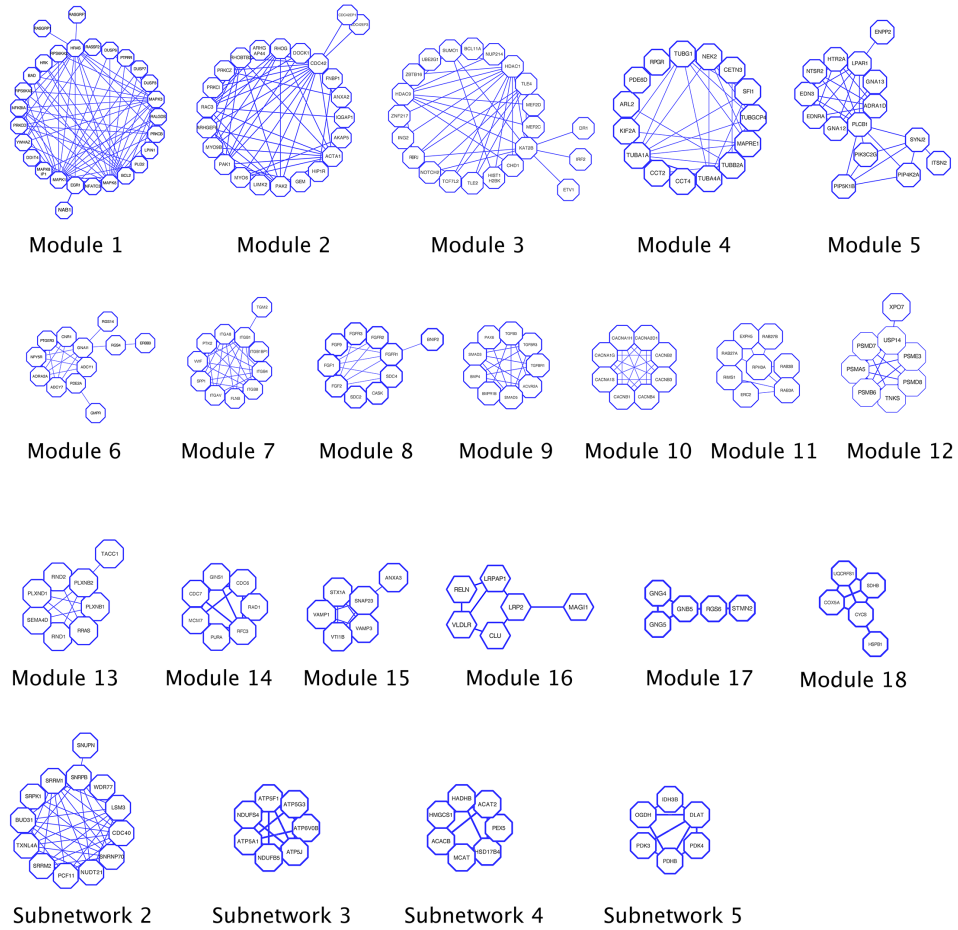

**Figure S1. Overview of consistently detected coexpressed PPI modules.**
