# Supplementary material for: Re-exploring the core genes and modules in the human frontal cortex during chronological aging: insights from network-based analysis of transcriptomic studies
Source: publisher site journal article supplement (doi:10.18632/aging.101589), 2018-10-20
Supplement: Supplementary file [file aging-v10i10-101589-supplementary-material-SD9.pdf]

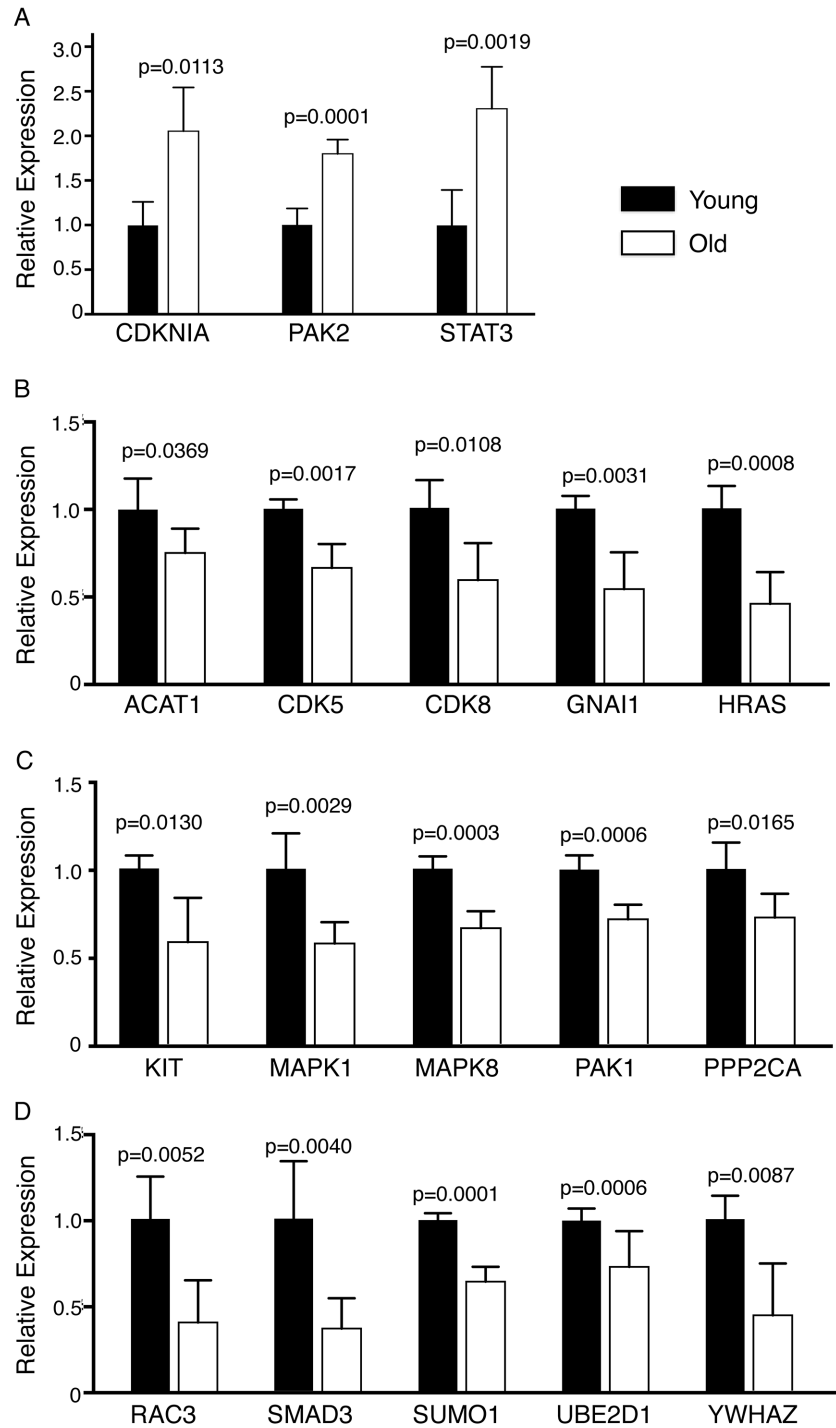

**Figure S2. Eighteen genes consistently detected in the results from the network analysis.**
