# Supplementary material for: Re-exploring the core genes and modules in the human frontal cortex during chronological aging: insights from network-based analysis of transcriptomic studies
Source: Aging (Albany NY). 2018 Oct 20;10(10):2816–31. doi: 10.18632/aging.101589 (PMC6224233; doi:10.18632/aging.101589)
Supplement: Table S1 [file aging-10-101589-s001.xlsx]

## Sheet: 工作表1
Table S1: Results of 8 significantly age associated genes in all five datasets
Results indicated with 1, 2, 3, 4 or 5 indicate the results obtained on samples within the single datasets:GSE1572, GSE11882, GSE30272, GSE53890 and GSE71620 respectively; Genes are colored either red or green to denote respectively increasing or decreasing relations with age
Symbol	GeneID	Name	t1	pval1	pval1 (bonf)	t2	pval2	pval2 (bonf)	t3	pval3	pval3 (bonf)	t4	pval4	pval4 (bonf)	t5	pval5	pval5 (bonf)
HTR7P1	93164	5-hydroxytryptamine (serotonin) receptor 7 pseudogene 1	-3.501	0.0017662	0.048912	-5.2608	9.0327e-06	0.0058324	-2.9002	0.0048045	0.049389	-3.7505	0.00078156	0.008494	-4.3655	2.2018e-05	0.0002958
MMD	23531	monocyte to macrophage differentiation-associated	-3.6532	0.0012043	0.039177	-4.0886	0.00026881	0.020792	-6.7219	2.3504e-09	1.9099e-06	-4.1574	0.00025935	0.004162	-9.4179	3.3738e-17	1.8373e-14
OLFM1	10439	olfactomedin 1	-3.4923	0.0018052	0.049241	-3.8185	0.00057433	0.029823	-4.5471	1.8932e-05	0.0015488	-6.2858	7.2017e-07	0.00014935	-10.442	5.1623e-20	7.8715e-17
ATP2B2	491	ATPase, Ca++ transporting, plasma membrane 2	-7.0061	2.4542e-07	0.00083234	-3.6336	0.00095793	0.036648	-3.2553	0.0016572	0.025942	-4.5381	9.0872e-05	0.0022401	-5.4017	2.2094e-07	5.8896e-06
ANXA4	307	annexin A4	3.8746	0.00068587	0.03152	3.4583	0.0015444	0.044815	7.5624	5.5715e-11	1.9144e-07	4.3657	0.00014631	0.0029034	10.212	2.2406e-19	2.2776e-16
LPL	4023	lipoprotein lipase	3.8658	0.00070148	0.031926	3.3789	0.0019123	0.048797	5.6002	2.8754e-07	7.9468e-05	3.5501	0.0013321	0.011923	10.308	1.21e-19	1.6e-16
VCAN	1462	versican	4.5047	0.00013535	0.013799	4.1708	0.00021283	0.018727	3.2366	0.0017563	0.02679	4.1928	0.0002354	0.0039009	4.9325	1.9278e-06	3.8077e-05
RHOBTB3	22836	Rho-related BTB domain containing 3	4.4334	0.00016279	0.015552	3.7281	0.00073832	0.033631	3.0623	0.0029844	0.0375	6.8919	1.4038e-07	6.0794e-05	7.5868	2.0856e-12	3.0054e-10
