# Supplementary material for: Re-exploring the core genes and modules in the human frontal cortex during chronological aging: insights from network-based analysis of transcriptomic studies
Source: Aging (Albany NY). 2018 Oct 20;10(10):2816–31. doi: 10.18632/aging.101589 (PMC6224233; doi:10.18632/aging.101589)
Supplement: Table S2 [file aging-10-101589-s002.xlsx]

## Sheet: 工作表1
Table S2. 1260 significant differentially expressed genes from meta-analysis
Name	CombinedES	Pval	CombinedTstat	CombinedPval	VoteCounts
AASDHPPT	-0.44801	0.00062581	-42.982	2.46e-05	-2
AATF	0.53664	3.4e-05	47.178	5.3e-06	2
AATK	0.52598	5.4e-05	53.966	4.03e-07	2
ABCA1	0.54361	2.9e-05	49.706	2.02e-06	2
ABCA2	0.61452	2.26e-06	58.628	6.66e-08	2
ABCA8	0.79803	1.04e-09	78.925	2.25e-11	2
ABCC9	0.58934	6.57e-06	52.828	6.16e-07	2
ABI2	-0.62258	1.49e-06	-59.687	4.44e-08	-3
ACACB	0.67376	2.1e-07	62.022	1.78e-08	3
ACADVL	0.58016	8.01e-06	56.187	1.74e-07	3
ACAT2	-0.62867	1.3e-06	-66.693	2.92e-09	-2
ACO1	0.8451	9.89e-11	77.908	3.35e-11	2
ACOT7	-0.85425	4.33e-11	-76.061	7.07e-11	-3
ACOT8	-0.93754	7.53e-13	-86.034	1.34e-12	-3
ACP1	-0.76663	3.24e-09	-71.421	4.46e-10	-3
ACSL1	0.47073	0.00034847	54.92	2.79e-07	3
ACSL4	-0.5703	1.19e-05	-56.146	1.77e-07	-2
ACTA1	-0.81085	4.02e-10	-75.642	8.4e-11	-2
ACTL6A	0.51722	7.02e-05	53.426	4.93e-07	2
ACTN2	-0.52051	5.71e-05	-43.998	1.71e-05	-2
ACTN4	0.47167	0.00029627	47.881	4.03e-06	2
ACVR2A	-0.84978	5.31e-11	-75.307	9.43e-11	-3
ADAM22	-0.7458	8.26e-09	-65.829	4.05e-09	-2
ADAM23	-0.60494	3.06e-06	-55.203	2.52e-07	-3
ADAMTS3	-0.55969	1.46e-05	-46.137	7.83e-06	-2
ADCY1	-0.73816	2.39e-08	-85.88	1.43e-12	-2
ADCY7	-0.90233	4.93e-12	-85.265	1.8e-12	-2
ADCYAP1	-0.94022	5.84e-13	-83.937	3.03e-12	-3
ADD2	-0.7009	6.71e-08	-66.476	3.16e-09	-3
ADD3	0.77172	2.91e-09	79.646	1.69e-11	4
ADIPOR2	0.83131	1.94e-10	89.046	4.04e-13	3
ADRA1D	-1.2441	0	-133.56	0	-2
ADRA2A	-1.268	0	-134.71	0	-4
AEBP1	1.1106	0	111.26	0	3
AFF1	1.0749	0	104.21	0	3
AGFG2	0.57527	9.14e-06	51.853	9.01e-07	3
AGGF1	-0.52156	5.6e-05	-44.724	1.32e-05	-2
AGPAT1	-0.64792	8.07e-07	-67.046	2.53e-09	-2
AGT	0.59458	4.35e-06	55.322	2.4e-07	2
AHCTF1	0.62848	1.16e-06	54.264	3.58e-07	3
AHCYL1	0.7282	1.95e-08	73.378	2.09e-10	4
AHNAK	0.92156	1.78e-12	89.517	3.32e-13	4
AHSA2	0.63673	8.32e-07	56.06	1.82e-07	3
AKAP1	0.60368	2.78e-06	48.175	3.62e-06	2
AKAP5	-0.83037	2.35e-10	-83.383	3.76e-12	-3
ALAD	0.52728	5.1e-05	44.589	1.38e-05	2
ALDH1L1	0.742	9.72e-09	63.742	9.09e-09	2
ALDH2	0.72873	1.84e-08	71.857	3.8e-10	4
ALDH6A1	0.705	4.76e-08	62.899	1.27e-08	2
ALDH7A1	0.75028	6.15e-09	63.25	1.11e-08	2
ALDH9A1	0.67635	1.98e-07	73.257	2.2e-10	3
AMOTL2	0.47999	0.00022321	43.441	2.08e-05	2
ANGPT2	0.69752	7.19e-08	62.395	1.54e-08	3
ANKRD6	-0.51008	8.07e-05	-42.512	2.94e-05	-2
ANP32B	1.2688	0	134.92	0	5
ANXA1	0.50092	0.00011269	42.256	3.23e-05	2
ANXA2	0.51543	7.15e-05	42.501	2.95e-05	2
ANXA3	0.73296	1.29e-08	59.761	4.3e-08	2
ANXA4	1.6517	0	Inf	0	5
ANXA5	0.75067	7.64e-09	71.249	4.73e-10	2
ANXA6	-0.49274	0.00014901	-42.94	2.51e-05	-2
AP1S1	-0.86531	3.07e-11	-85.875	1.43e-12	-4
AP3S1	-0.66589	2.88e-07	-57.973	8.66e-08	-2
APOD	0.83182	2.83e-10	103.54	0	4
AQP1	1.3115	0	Inf	0	4
AQP4	0.67814	1.71e-07	62.63	1.41e-08	3
ARG2	-0.72724	1.86e-08	-68.201	1.57e-09	-3
ARHGAP19	0.47434	0.00026337	39.121	9.99e-05	2
ARHGAP44	-0.61407	2.06e-06	-51.769	9.32e-07	-2
ARHGEF10	0.67663	1.81e-07	64.918	5.7e-09	2
ARHGEF6	0.89403	7.35e-12	88.99	4.04e-13	4
ARHGEF9	-0.55901	1.67e-05	-53.896	4.14e-07	-2
ARL2	0.45805	0.00049156	57.162	1.2e-07	2
ARL4C	-0.75962	4.21e-09	-65.479	4.62e-09	-2
ARL4D	-0.97604	1.64e-13	-96.623	1.46e-14	-3
ARMCX2	-0.44085	0.00073029	-38.444	0.00012589	-2
ARNTL	-0.65142	4.66e-07	-59.436	4.86e-08	-3
ARPC2	-0.79767	7.48e-10	-70.2	7.21e-10	-4
ARPC3	-0.6091	2.47e-06	-55.244	2.48e-07	-3
ARPC5	-0.6677	2.71e-07	-67.258	2.32e-09	-3
ARPP19	-0.87858	2.18e-11	-92.121	1.12e-13	-3
ASCC2	0.55751	1.81e-05	50.726	1.38e-06	2
ASCL1	0.67856	1.36e-07	54.489	3.28e-07	3
ASNS	-0.48658	0.00017844	-43.044	2.41e-05	-2
ASPA	0.64233	8.12e-07	64.963	5.61e-09	2
ASPH	0.64458	1.06e-06	72.4	3.04e-10	3
ASPHD1	-0.57777	7.7e-06	-49.237	2.43e-06	-3
ASS1	-0.53793	3.16e-05	-43.759	1.86e-05	-2
ATAD2B	0.7267	1.87e-08	61.054	2.6e-08	2
ATP10D	0.57419	8.52e-06	47.145	5.36e-06	2
ATP2B2	-1.0736	0	-114.72	0	-5
ATP2C1	-0.66175	2.93e-07	-55.581	2.18e-07	-3
ATP5A1	-0.55753	1.66e-05	-52.478	7.11e-07	-2
ATP5F1	-0.43639	0.00096898	-49.93	1.86e-06	-2
ATP5G3	-0.7732	2.41e-09	-70.121	7.42e-10	-3
ATP5J	-0.65865	3.45e-07	-60.318	3.48e-08	-3
ATP6AP2	-0.57213	1.08e-05	-56.517	1.54e-07	-2
ATP6V0B	-0.65928	3.22e-07	-55.072	2.64e-07	-3
ATP6V0D1	-0.75972	4.7e-09	-75.815	7.85e-11	-3
ATP6V0E1	0.75336	6.83e-09	70.573	6.17e-10	3
ATP6V1G2	-0.65523	4.66e-07	-72.836	2.55e-10	-2
ATP9B	0.43613	0.00095012	40.453	6.22e-05	2
ATRN	-0.8024	5.7e-10	-70.668	5.96e-10	-2
ATXN10	-0.76955	2.64e-09	-66.834	2.76e-09	-3
ATXN7	0.53988	3.17e-05	44.827	1.27e-05	2
AZGP1	0.7152	3.39e-08	65.267	4.97e-09	2
AZIN1	-0.71332	4.4e-08	-74.387	1.38e-10	-2
B3GALNT1	-0.61801	2.51e-06	-82.146	6.16e-12	-2
B4GALT3	-0.67211	1.84e-07	-53.777	4.33e-07	-2
B4GALT6	-0.52995	4.88e-05	-53.737	4.38e-07	-2
B9D1	-0.6739	1.69e-07	-55.665	2.11e-07	-2
BAD	-0.85543	4.66e-11	-79.35	1.92e-11	-2
BAIAP3	0.75733	4.51e-09	65.627	4.36e-09	2
BAZ1A	0.69299	8.07e-08	61.631	2.06e-08	2
BAZ2B	0.87812	1.44e-11	82.652	4.98e-12	3
BBOX1	0.72317	2.33e-08	67.771	1.88e-09	3
BBX	0.91531	2.55e-12	86.756	1.01e-12	2
BCAR3	0.53738	3.31e-05	47.006	5.65e-06	3
BCAS1	0.87771	1.57e-11	86.258	1.23e-12	4
BCHE	-0.53792	3.21e-05	-42.73	2.71e-05	-2
BCL11A	-0.96827	1.28e-13	-89.547	3.29e-13	-2
BCL2	0.7348	1.56e-08	68.293	1.52e-09	2
BDNF	-0.88967	7.35e-12	-77.614	3.77e-11	-3
BGN	0.95309	2.95e-13	85.195	1.85e-12	2
BMP4	0.60379	3.77e-06	60.576	3.14e-08	2
BMPR1B	0.66443	3.12e-07	62.786	1.32e-08	3
BNIP2	0.62005	1.64e-06	53.957	4.04e-07	3
BRCA1	0.49856	0.0001225	40.853	5.37e-05	2
BRD1	0.46381	0.0003491	35.863	0.0003132	2
BRWD1	0.65338	3.94e-07	51.113	1.19e-06	2
BTBD3	-0.75875	7.71e-09	-81.514	8.05e-12	-2
BTG1	0.56206	1.42e-05	48.167	3.63e-06	2
BUD31	-0.64278	5.77e-07	-49.801	1.95e-06	-2
BZW1	-0.56248	1.58e-05	-49.837	1.92e-06	-2
C1orf216	-0.47814	0.0002393	-42.101	3.42e-05	-2
C2CD2	1.1238	0	114.01	0	4
C5	0.54393	2.65e-05	43.859	1.8e-05	2
C5orf30	-0.67679	1.58e-07	-58.221	7.83e-08	-2
C6orf106	-0.45687	0.00047309	-45.482	9.94e-06	-2
CA2	0.73756	1.9e-08	75.732	8.09e-11	2
CA5B	0.79573	1.16e-09	74.381	1.38e-10	3
CA7	-0.78572	1.36e-09	-66.888	2.7e-09	-2
CACNA1G	-1.2621	0	-134.28	0	-4
CACNA1H	-0.96288	2.02e-13	-88.337	5.3e-13	-2
CACNA1S	-0.525	5.08e-05	-42.506	2.95e-05	-2
CACNA2D1	-0.78488	1.58e-09	-75.318	9.41e-11	-2
CACNB1	-0.58861	5.36e-06	-48.161	3.63e-06	-2
CACNB2	-0.61666	2.03e-06	-63.719	9.17e-09	-3
CACNB3	-0.9183	1.98e-12	-84.38	2.58e-12	-4
CACNB4	-0.52651	5.19e-05	-50.442	1.54e-06	-2
CACNG3	-0.90953	3.6e-12	-85.301	1.78e-12	-4
CALB1	-1.8256	0	-225.06	0	-4
CALB2	-0.8839	1.56e-11	-86.555	1.1e-12	-2
CALCOCO2	0.93916	6.16e-13	85.589	1.61e-12	4
CALU	-0.84899	8.3e-11	-81.418	8.37e-12	-3
CAMK1	-0.83169	1.26e-10	-72.19	3.31e-10	-2
CAMK4	-1.5198	0	-176.23	0	-4
CAMKK2	-0.76754	4.36e-09	-82.917	4.5e-12	-3
CAMSAP1	-0.79404	9.2e-10	-75.617	8.42e-11	-4
CAP2	-0.65316	4.52e-07	-64.396	7.01e-09	-2
CAPG	0.82494	2.03e-10	75.623	8.42e-11	3
CAPN2	0.57013	1.25e-05	63.631	9.49e-09	2
CAPN3	0.8367	1.54e-10	78.976	2.21e-11	2
CAPN5	-0.66053	2.96e-07	-54.388	3.41e-07	-2
CAPZA2	-0.74699	8.57e-09	-74.916	1.1e-10	-3
CASK	-0.68497	1.03e-07	-54.569	3.18e-07	-2
CAST	0.78892	1.21e-09	69.601	9.1e-10	2
CBFB	0.78449	1.45e-09	73.758	1.79e-10	2
CBR1	0.47737	0.00025201	46.3	7.39e-06	2
CBR3	0.62807	1.16e-06	54.517	3.25e-07	3
CBS	0.60823	2.93e-06	65.692	4.25e-09	2
CCDC69	0.56046	1.43e-05	48.085	3.74e-06	2
CCK	-0.67973	1.51e-07	-60.959	2.7e-08	-2
CCKBR	-0.69658	6.96e-08	-63.816	8.82e-09	-3
CCNA1	-1.0974	0	-112.39	0	-3
CCNC	-0.57637	7.82e-06	-47.516	4.65e-06	-2
CCND2	-0.54823	2.26e-05	-48.647	3.02e-06	-2
CCND3	0.49081	0.00015328	43.566	1.99e-05	2
CCNG2	-0.71851	2.9e-08	-63.512	9.95e-09	-2
CCT2	-0.46749	0.00036004	-48.448	3.27e-06	-2
CCT4	-0.43067	0.00094295	-33.155	0.0008079	-2
CD14	0.51918	6.4e-05	45.004	1.18e-05	2
CD163	0.63687	8.48e-07	55.66	2.12e-07	2
CD200	-0.62953	1.23e-06	-59.026	5.69e-08	-2
CD22	0.78143	2.43e-09	73.45	2.04e-10	2
CD44	0.88064	1.47e-11	80.404	1.24e-11	2
CD74	0.7647	4.08e-09	71.2	4.8e-10	3
CD83	0.82678	1.65e-10	69.012	1.16e-09	2
CD9	0.51982	6.05e-05	43.838	1.81e-05	2
CDC40	-0.81692	3.4e-10	-81.163	9.15e-12	-3
CDC42	-0.6491	5.25e-07	-57.805	9.23e-08	-3
CDC42EP1	0.49068	0.0001647	43.806	1.83e-05	2
CDC42EP3	-0.81859	3.03e-10	-75.32	9.41e-11	-2
CDC6	-0.90122	4.55e-12	-82.923	4.5e-12	-4
CDC7	-0.47166	0.00028954	-38.617	0.00011857	-2
CDH12	-0.65952	3.22e-07	-55.917	1.92e-07	-2
CDH13	-0.7559	5.71e-09	-71.65	4.1e-10	-2
CDH19	1.087	0	109.03	0	2
CDH8	-0.99194	6.09e-14	-101.15	0	-3
CDK16	-1.0076	3.14e-14	-103.17	0	-2
CDK17	-0.73699	1.45e-08	-76.626	5.64e-11	-3
CDK18	0.58256	6.73e-06	50.775	1.36e-06	2
CDK20	-0.66366	2.62e-07	-58.124	8.13e-08	-3
CDK5	-0.9125	2.37e-12	-83.215	4.05e-12	-3
CDK5R1	-0.74119	1.3e-08	-77.545	3.86e-11	-3
CDK5R2	-1.1691	0	-114.58	0	-3
CDK8	-0.76812	2.75e-09	-64.52	6.67e-09	-3
CDKN1A	0.60095	3.4e-06	53.095	5.59e-07	2
CEBPD	0.5331	3.89e-05	48.04	3.8e-06	2
CEP350	0.54888	2.35e-05	54.861	2.85e-07	2
CETN3	0.45794	0.00044234	43.042	2.41e-05	2
CFH	0.83634	9.89e-11	70.773	5.73e-10	2
CFI	0.72989	1.63e-08	64.885	5.78e-09	4
CGREF1	-1.0084	1.65e-14	-94.2	4.79e-14	-3
CHD1	0.83096	1.46e-10	72.311	3.16e-10	2
CHI3L1	1.1455	0	115.15	0	3
CHL1	-0.47574	0.0002577	-44.111	1.64e-05	-2
CHML	-0.60114	3.57e-06	-59.368	5e-08	-3
CHRNA4	-0.78777	1.63e-09	-75.357	9.3e-11	-2
CHST3	0.49716	0.00013948	52.802	6.22e-07	2
CHSY1	0.48742	0.00018743	52.024	8.48e-07	3
CIZ1	0.4679	0.00031405	36.726	0.00022957	2
CLASRP	0.7243	1.99e-08	66.632	2.98e-09	3
CLCN4	-0.61995	1.73e-06	-60.346	3.44e-08	-2
CLDND1	0.93201	9.83e-13	88.727	4.48e-13	3
CLEC2B	0.46327	0.00040908	48.388	3.35e-06	2
CLIC1	0.56642	1.26e-05	51.303	1.12e-06	2
CLIC4	0.56477	1.34e-05	54.597	3.16e-07	2
CLK1	0.85936	4.22e-11	80.041	1.44e-11	2
CLMN	0.89942	5.3e-12	85.169	1.86e-12	3
CLOCK	-0.52526	5.23e-05	-46.113	7.9e-06	-2
CLSTN3	-0.60777	2.56e-06	-53.162	5.45e-07	-3
CLU	0.58471	6.63e-06	55.181	2.54e-07	3
CMAHP	0.85913	3.41e-11	74.955	1.09e-10	2
CNP	0.64678	5.88e-07	62.411	1.54e-08	2
CNR1	-0.78955	2.64e-09	-91.701	1.33e-13	-2
CNTN6	-0.94286	4.76e-13	-84.869	2.09e-12	-4
CNTRL	0.84586	6.23e-11	73.246	2.2e-10	3
COL21A1	0.65658	4.08e-07	59.036	5.68e-08	3
COL4A5	0.76787	3.22e-09	74.136	1.52e-10	3
COPS5	-0.59679	3.66e-06	-47.919	3.98e-06	-2
COQ2	-0.56371	1.35e-05	-48.832	2.82e-06	-2
COQ7	-0.53346	3.71e-05	-45.68	9.29e-06	-2
COX5A	-0.55586	1.89e-05	-57.101	1.22e-07	-2
COX8A	-0.53681	3.5e-05	-48.255	3.51e-06	-2
CP	0.9905	4.66e-14	97.44	1.46e-14	3
CPM	0.55104	2.16e-05	48.664	3e-06	2
CPNE3	0.73839	1.21e-08	68.423	1.45e-09	3
CPNE6	-0.87111	2.36e-11	-82.78	4.75e-12	-3
CPOX	0.53357	3.67e-05	41.658	4.02e-05	2
CRH	-1.2311	0	-132.19	0	-4
CRHBP	-0.96091	1.76e-13	-87.149	8.61e-13	-3
CRHR1	-0.65274	4.11e-07	-52.878	6.05e-07	-2
CRIP2	-0.5796	7.87e-06	-50.854	1.32e-06	-3
CRMP1	-0.99939	1.65e-14	-91.19	1.64e-13	-3
CRTAP	0.93615	1.05e-12	92.541	9.54e-14	3
CRYAB	0.72087	3.07e-08	78.698	2.46e-11	3
CRYM	-0.82619	1.83e-10	-74.991	1.07e-10	-3
CSNK2A1	-0.64385	6.18e-07	-57.746	9.44e-08	-2
CSRNP2	-0.57423	9.07e-06	-51.8	9.2e-07	-3
CSRP1	0.61778	1.95e-06	62.874	1.28e-08	2
CTNNA1	0.77989	2.67e-09	78.566	2.58e-11	2
CTNNAL1	0.74659	8.48e-09	69.822	8.33e-10	3
CTSH	0.73825	1.2e-08	68.602	1.35e-09	3
CUL9	0.54041	2.9e-05	45.126	1.13e-05	2
CUX2	-0.92743	2.21e-12	-97.082	1.46e-14	-2
CX3CL1	-1.482	0	-163.4	0	-4
CXADR	-1.083	0	-110.83	0	-4
CXCL12	-0.7799	1.57e-09	-64.137	7.75e-09	-2
CYCS	-0.55261	1.95e-05	-48.035	3.81e-06	-2
CYP26A1	-0.74142	9.45e-09	-65.942	3.9e-09	-3
CYP2J2	0.50382	0.00010371	45.159	1.12e-05	2
CYTH3	-0.44256	0.00068279	-38.158	0.00013919	-2
DAAM2	0.87374	1.67e-11	77.916	3.35e-11	3
DACH1	-0.85324	6.88e-11	-78.629	2.52e-11	-2
DBI	0.68344	1.18e-07	59.78	4.28e-08	3
DCAF11	-0.65861	3.79e-07	-62.573	1.44e-08	-2
DCAF7	-0.68781	9.02e-08	-55.173	2.54e-07	-2
DCK	-0.6968	8.09e-08	-65.929	3.92e-09	-2
DCLK1	-0.52829	4.57e-05	-45.801	8.88e-06	-2
DCTN3	-0.71759	2.53e-08	-62.073	1.74e-08	-3
DCTN5	-0.7141	3.22e-08	-66.65	2.96e-09	-3
DDAH2	0.60857	2.94e-06	60.248	3.56e-08	3
DDHD2	-0.63597	1.01e-06	-56.511	1.54e-07	-2
DDIT4	0.69136	8.39e-08	59.294	5.13e-08	2
DDR2	0.59	5.49e-06	58.374	7.38e-08	2
DDX10	-0.57969	7.4e-06	-50.042	1.78e-06	-3
DDX17	0.47497	0.00025347	40.033	7.24e-05	2
DDX27	0.51689	6.65e-05	41.135	4.85e-05	2
DDX49	-0.77807	1.92e-09	-66.168	3.56e-09	-2
DENND5A	0.52944	4.97e-05	59.204	5.31e-08	2
DGKB	-0.90763	3.77e-12	-88.99	4.04e-13	-3
DGKE	-0.55747	1.8e-05	-50.671	1.41e-06	-2
DGUOK	-0.53418	3.52e-05	-41.52	4.24e-05	-2
DHRS3	0.94334	6.61e-13	97.582	7.69e-15	4
DIO2	-0.77739	1.86e-09	-64.934	5.67e-09	-2
DLAT	-0.54402	3.02e-05	-56.211	1.73e-07	-2
DLC1	0.47559	0.00024468	38.869	0.00010875	2
DLG3	-0.84979	6.64e-11	-81.047	9.52e-12	-2
DLGAP1	-0.65455	4.48e-07	-68.358	1.49e-09	-3
DNAJA1	-0.63788	7.55e-07	-56.113	1.79e-07	-3
DNAJB2	0.49237	0.00015291	47.405	4.85e-06	2
DNAJB4	-0.48132	0.00022411	-51.498	1.04e-06	-2
DNAJB5	-1.1152	0	-111.82	0	-3
DNAJC13	-0.69688	6.53e-08	-56.006	1.86e-07	-2
DNM2	0.58594	5.89e-06	52.474	7.11e-07	2
DOCK1	0.74855	6.58e-09	65.781	4.11e-09	3
DOK5	-0.98338	8.73e-14	-94.23	4.79e-14	-3
DPY19L4	0.57288	9.4e-06	48.932	2.73e-06	3
DPYSL4	-0.64375	5.77e-07	-52.821	6.18e-07	-2
DR1	-0.63785	7.73e-07	-56.375	1.62e-07	-3
DRD1	-0.77272	2.35e-09	-70.265	7.03e-10	-3
DSCR3	-0.51263	7.5e-05	-43.729	1.88e-05	-2
DST	0.74492	7.46e-09	60.79	2.88e-08	2
DTNA	0.65406	4.28e-07	56.436	1.58e-07	3
DUSP14	-1.1892	0	-125.6	0	-3
DUSP3	-0.87783	1.42e-11	-78.854	2.3e-11	-2
DUSP6	-0.77687	2.03e-09	-69.455	9.62e-10	-3
DUSP7	-0.68072	2.33e-07	-72.905	2.49e-10	-2
DYRK2	-0.80622	5.92e-10	-77.231	4.38e-11	-3
EDN3	-0.59935	3.4e-06	-51.297	1.12e-06	-3
EDNRA	-0.55221	1.85e-05	-43.715	1.89e-05	-2
EEF1D	0.76929	2.87e-09	72.963	2.44e-10	3
EFEMP1	1.2392	0	141.91	0	4
EFHD1	1.0373	0	112.08	0	4
EFNA1	0.59663	3.88e-06	54.377	3.43e-07	2
EFR3B	-0.55606	1.58e-05	-41.001	5.09e-05	-2
EFS	0.59933	3.56e-06	52.956	5.87e-07	2
EGR1	-0.72573	1.99e-08	-68.299	1.52e-09	-4
EGR2	-0.74124	1.21e-08	-72.408	3.04e-10	-4
EGR3	-0.92587	1.82e-12	-94.403	4.21e-14	-2
EHBP1	-0.45405	0.0005041	-37.864	0.00015466	-2
EIF4E2	-0.60113	3.41e-06	-51.453	1.05e-06	-2
ELF1	0.56517	1.25e-05	48.321	3.42e-06	2
ELF2	0.82093	2.14e-10	70.331	6.84e-10	2
EML2	0.45513	0.0005093	42.132	3.38e-05	2
EML3	0.57639	9.06e-06	56.052	1.83e-07	3
EMP2	0.53909	3.67e-05	51.046	1.23e-06	2
EMP3	0.78969	1.44e-09	75.61	8.42e-11	3
EMX2	0.43557	0.00088782	41.477	4.3e-05	2
ENC1	-0.64904	6.54e-07	-62.304	1.59e-08	-2
ENOX2	0.48595	0.00017743	41.418	4.39e-05	2
ENPP2	0.74832	7.69e-09	70.11	7.43e-10	3
ENSA	-0.70661	4.71e-08	-66.457	3.18e-09	-2
ENTPD2	0.50063	0.00011769	44.151	1.62e-05	2
ENTPD3	-0.48933	0.00015914	-39.794	7.87e-05	-2
EPCAM	-0.52536	4.81e-05	-41.722	3.94e-05	-2
EPHA3	-0.90658	3.27e-12	-79.115	2.09e-11	-2
EPHA4	-0.61896	2.09e-06	-62.842	1.29e-08	-2
EPHA5	-1.3029	0	-135.97	0	-4
EPHB2	-0.45118	0.00058819	-45.31	1.06e-05	-2
EPHB3	-0.61617	1.96e-06	-58.365	7.4e-08	-3
EPHX1	0.55691	1.98e-05	62.356	1.56e-08	2
EPM2AIP1	0.63337	9.13e-07	55.033	2.67e-07	3
ERBB3	0.60359	2.86e-06	47.971	3.9e-06	2
ERC2	-0.4629	0.00040895	-47.778	4.2e-06	-2
ERCC1	-0.43544	0.00090505	-39.756	7.98e-05	-2
ERP29	-0.60136	3.27e-06	-52.459	7.14e-07	-2
ETF1	-0.66873	2.46e-07	-59.176	5.37e-08	-3
ETV1	-0.6669	2.99e-07	-59.497	4.75e-08	-2
ETV4	-0.66346	2.99e-07	-59.647	4.51e-08	-2
ETV5	-0.60891	2.62e-06	-52.501	7.05e-07	-2
EVI2A	0.5583	1.62e-05	46.732	6.29e-06	2
EVI2B	0.51651	6.57e-05	43.475	2.06e-05	2
EXOC6B	0.50473	0.00010867	51.154	1.18e-06	2
EXPH5	-1.2017	0	-135.73	0	-2
EXTL1	-0.51935	6.8e-05	-49.608	2.1e-06	-2
EXTL3	-0.57443	1.27e-05	-61.696	2.01e-08	-3
EZR	0.78419	1.56e-09	72.837	2.55e-10	3
FABP3	-0.67079	2.11e-07	-59.006	5.73e-08	-3
FAH	0.51211	7.71e-05	43.887	1.78e-05	2
FAM107A	0.84411	1.07e-10	88.224	5.52e-13	3
FAM110B	-0.89537	6.99e-12	-80.563	1.16e-11	-3
FAM114A1	0.70392	5.4e-08	67.412	2.18e-09	2
FAM131A	-1.3378	0	-144.32	0	-4
FAM13A	0.44274	0.00066415	34.528	0.00050157	2
FAM193A	0.72556	1.84e-08	61.62	2.07e-08	3
FAM20B	-0.4334	0.0009797	-45.873	8.65e-06	-2
FAM32A	-0.79342	8.23e-10	-68.511	1.4e-09	-2
FAM49A	-0.762	5.01e-09	-83.43	3.74e-12	-4
FAM53B	0.66131	2.77e-07	55.673	2.11e-07	2
FANCL	0.52847	4.49e-05	43.61	1.96e-05	2
FBLN2	-0.86313	2.73e-11	-76.493	5.92e-11	-3
FBN1	0.8636	2.95e-11	75.408	9.15e-11	3
FBXL2	-0.79457	1.14e-09	-71.943	3.68e-10	-2
FCER1G	0.52018	5.87e-05	43.533	2.01e-05	2
FCGBP	0.65534	3.69e-07	55.411	2.33e-07	3
FCGR2A	0.59578	3.88e-06	49.109	2.56e-06	2
FCGRT	0.50919	9.96e-05	58.224	7.83e-08	2
FDPS	-0.58404	6.41e-06	-53.291	5.18e-07	-2
FDX1	-0.47317	0.00027977	-45.414	1.02e-05	-2
FECH	-0.69935	6.53e-08	-60.11	3.77e-08	-3
FERMT2	0.62383	1.58e-06	64.321	7.19e-09	3
FGF1	0.92898	1.28e-12	91.658	1.38e-13	4
FGF12	-0.834	1.5e-10	-84.443	2.52e-12	-3
FGF13	-0.94327	7.78e-13	-104.03	0	-4
FGF2	0.76202	4.29e-09	69.829	8.32e-10	3
FGF9	-0.62571	1.19e-06	-48.368	3.36e-06	-2
FGFR1	0.76513	4.13e-09	69.09	1.12e-09	2
FGFR2	0.43252	0.00091526	34.349	0.00053343	2
FGFR3	0.77333	2.28e-09	66.94	2.65e-09	2
FHL2	-0.66645	2.41e-07	-57.781	9.3e-08	-2
FKBP5	1.5602	0	Inf	0	4
FLNB	0.77208	2.95e-09	70.687	5.92e-10	2
FLRT1	-0.97296	8.73e-14	-89.811	2.97e-13	-3
FNBP1	1.2356	0	129.67	0	3
FNBP4	0.59967	3.19e-06	47.77	4.21e-06	2
FOXK2	-0.59531	4.88e-06	-56.577	1.5e-07	-2
FOXO4	0.65992	3.02e-07	57.604	1e-07	2
FRMD4B	0.73391	1.33e-08	65.768	4.12e-09	3
FRMPD4	-0.77343	2.47e-09	-71.839	3.82e-10	-2
FRYL	1.0892	0	108.71	0	4
FXYD1	0.68206	1.36e-07	63.397	1.04e-08	2
FZD7	0.51669	6.88e-05	47.059	5.54e-06	3
G3BP1	0.49172	0.00014901	40.048	7.2e-05	2
GAB1	0.88171	2.09e-11	89.025	4.04e-13	2
GAB2	0.66518	2.62e-07	61.981	1.8e-08	3
GABBR2	-0.89798	1.57e-11	-101.03	0	-2
GABRA5	-0.96933	1.64e-13	-94.516	4.21e-14	-3
GABRB3	-0.87954	1.67e-11	-90.607	2.13e-13	-3
GABRD	-0.48648	0.00019316	-49.9	1.88e-06	-2
GAD1	-0.59004	5.16e-06	-55.679	2.11e-07	-2
GAD2	-0.55216	1.93e-05	-45.941	8.43e-06	-2
GAL	-0.60395	2.83e-06	-50.474	1.52e-06	-2
GALNT1	-0.60825	2.76e-06	-53.444	4.9e-07	-2
GATAD1	0.47793	0.00023862	38.755	0.00011329	2
GDE1	-0.68204	1.43e-07	-59.611	4.56e-08	-3
GEM	0.80608	5.7e-10	76.866	5.13e-11	3
GFAP	1.4158	0	Inf	0	4
GGCT	-1.0941	0	-111.37	0	-3
GHITM	-0.47154	0.00029627	-43.871	1.79e-05	-2
GINS1	-0.45573	0.00044212	-34.035	0.00059535	-2
GJA1	0.75178	7.16e-09	69.769	8.51e-10	3
GLCE	-0.74521	8.91e-09	-65.214	5.07e-09	-2
GLRA2	-0.91931	1.81e-12	-86.393	1.17e-12	-2
GLRX3	-0.43223	0.00094112	-41.404	4.41e-05	-2
GLUL	0.52922	4.17e-05	42.542	2.91e-05	2
GMPR	1.1381	0	118.83	0	4
GNA12	0.62765	1.46e-06	61.794	1.94e-08	3
GNA13	0.60114	4.24e-06	57.862	9.02e-08	3
GNAI1	-0.43685	0.00081349	-37.07	0.00020516	-2
GNAL	-1.044	0	-109.08	0	-3
GNB5	-0.7245	1.97e-08	-64.205	7.55e-09	-2
GNG12	0.69625	8.02e-08	71.335	4.61e-10	3
GNG4	-0.79745	6.97e-10	-69.23	1.06e-09	-3
GNG5	0.55226	2.07e-05	52.109	8.2e-07	2
GOLIM4	0.54295	2.98e-05	48.321	3.42e-06	2
GOSR2	-0.48029	0.00021345	-41.659	4.02e-05	-2
GPATCH8	0.5125	8.07e-05	46.198	7.68e-06	2
GPC4	0.56762	1.12e-05	50.184	1.69e-06	2
GPM6A	-0.65736	3.58e-07	-58.596	6.73e-08	-3
GPM6B	0.45979	0.00043772	45.612	9.51e-06	2
GPR17	-0.78719	1.5e-09	-69.604	9.1e-10	-2
GPRC5B	0.66714	2.72e-07	68.209	1.57e-09	3
GRIA1	-0.81189	5.33e-10	-89.989	2.71e-13	-3
GRIK1	-1.2537	0	-126.89	0	-3
GRIK3	-0.70503	4.76e-08	-58.309	7.57e-08	-2
GRIN2B	-0.58886	7.25e-06	-59.621	4.55e-08	-2
GRK4	0.4914	0.0001524	37.682	0.00016491	2
GRK5	-0.53126	3.91e-05	-40.13	6.99e-05	-2
GRM1	-0.52854	4.21e-05	-41.362	4.47e-05	-2
GRM2	-0.95507	2.95e-13	-89.456	3.41e-13	-3
GRM5	-0.46363	0.00037403	-39.242	9.56e-05	-2
GRP	-0.75177	5.75e-09	-66.009	3.8e-09	-3
GSN	1.0354	0	107.76	0	2
GSR	-0.54667	3.12e-05	-66.82	2.76e-09	-3
GUCA1A	-0.57084	1.06e-05	-54.433	3.35e-07	-2
GUCY1A2	-0.54047	3.15e-05	-49.152	2.51e-06	-2
GUK1	-0.57694	8.49e-06	-55.101	2.61e-07	-2
GUSBP11	0.79806	8.23e-10	69.859	8.24e-10	2
GYG1	0.5585	1.77e-05	53.576	4.67e-07	2
HADHB	0.65478	4.29e-07	63.146	1.15e-08	3
HAPLN1	-0.88061	1.56e-11	-88.164	5.6e-13	-4
HCCS	-0.55434	2e-05	-55.672	2.11e-07	-3
HCLS1	0.45513	0.00050054	45.209	1.1e-05	3
HCRTR1	-0.49315	0.0001524	-43.359	2.14e-05	-2
HDAC1	0.48394	0.000195	42.572	2.88e-05	2
HDAC9	-1.1865	0	-134.48	0	-4
HEBP2	1.3196	0	138.41	0	4
HEPH	0.57498	8.6e-06	50.403	1.56e-06	2
HIF1A	0.59323	5.16e-06	65.13	5.24e-09	3
HIP1R	0.63994	7.2e-07	58.214	7.83e-08	2
HIPK2	0.82267	2.62e-10	75.779	7.95e-11	3
HIST1H1C	0.83607	1.29e-10	77.862	3.41e-11	2
HIST1H2BK	-1.1565	0	-116.81	0	-3
HIVEP2	-1.1008	0	-111.87	0	-4
HLA-A	0.47053	0.00029032	39.839	7.76e-05	2
HLA-DMA	0.66664	2.81e-07	63.153	1.15e-08	3
HLA-DMB	0.47166	0.0002915	43.331	2.17e-05	3
HLA-DPA1	1.0527	0	105.11	0	2
HLA-E	0.69895	6.08e-08	59.902	4.09e-08	2
HLF	-0.56887	1.31e-05	-66.679	2.93e-09	-2
HMGB2	0.81362	3.07e-10	71.236	4.75e-10	3
HMGCR	-0.62165	1.49e-06	-51.235	1.14e-06	-2
HMGCS1	-0.95346	3.79e-13	-99.299	7.69e-15	-4
HMGN3	0.66996	2.43e-07	61.458	2.21e-08	2
HMOX2	-0.71938	2.43e-08	-64.702	6.22e-09	-3
HOMER1	-1.3127	0	-146.45	0	-4
HOPX	-0.60053	3.37e-06	-47.424	4.82e-06	-2
HPCA	-0.85634	4.2e-11	-75.607	8.42e-11	-3
HPS5	0.74064	1e-08	68.786	1.26e-09	4
HRAS	-0.4887	0.00016174	-38.344	0.00013034	-2
HRK	-0.51713	7.22e-05	-55.802	2.01e-07	-2
HS3ST1	-0.57372	9.06e-06	-45.655	9.37e-06	-2
HSD11B1	0.76601	3.84e-09	68.805	1.25e-09	2
HSD17B4	0.91229	2.65e-12	85.046	1.96e-12	3
HSDL2	0.66029	3.35e-07	56.277	1.68e-07	2
HSF4	0.78246	2.4e-09	83.703	3.34e-12	4
HSPA13	-0.63445	9.27e-07	-54.729	3e-07	-2
HSPA2	0.91242	3.68e-12	93.451	6.62e-14	3
HSPB1	0.88167	1.88e-11	90.017	2.71e-13	3
HSPB3	-0.5978	3.56e-06	-51.267	1.13e-06	-2
HSPBP1	-0.68077	1.45e-07	-58.4	7.31e-08	-2
HTR2A	-0.84014	9.94e-11	-77.927	3.34e-11	-3
HTR7P1	-0.90167	5.34e-12	-91.175	1.64e-13	-5
HTRA1	0.51043	9.28e-05	58.328	7.51e-08	2
HTRA2	-0.72628	1.68e-08	-60.827	2.84e-08	-3
HYAL3	-0.78323	1.38e-09	-65.896	3.95e-09	-2
ICK	0.54556	2.32e-05	41.987	3.57e-05	2
ID3	0.57699	8.25e-06	52.303	7.58e-07	3
ID4	0.72612	1.9e-08	63.389	1.04e-08	2
IDH3B	-0.55417	1.78e-05	-45.297	1.07e-05	-2
IFI16	0.43467	0.00094578	48.526	3.17e-06	2
IFITM1	0.57518	8.43e-06	50.254	1.65e-06	3
IFITM2	0.66467	2.72e-07	59.84	4.18e-08	3
IFITM3	0.71339	3.42e-08	66.36	3.31e-09	3
IFNGR1	0.65141	5.23e-07	63.571	9.73e-09	2
IFT88	0.5275	4.91e-05	48.779	2.88e-06	2
IGF1	-1.2403	0	-129.56	0	-4
IGSF3	-0.4801	0.00023762	-44.111	1.64e-05	-2
IL12RB2	-0.69956	6.19e-08	-63.136	1.15e-08	-2
IL13RA2	-0.57482	9.78e-06	-60.3	3.5e-08	-2
ING2	-0.64104	6.29e-07	-49.33	2.34e-06	-2
INPP4A	-0.70665	4.73e-08	-65.411	4.74e-09	-2
INSIG2	-0.70913	3.89e-08	-62.032	1.77e-08	-2
INSR	0.734	1.29e-08	65.622	4.36e-09	3
IQCK	0.54031	2.91e-05	45.352	1.04e-05	2
IQGAP1	0.95754	2.87e-13	94.983	3.61e-14	4
IRF2	0.58278	9.1e-06	57.126	1.21e-07	2
ISCA1	-0.59464	5.17e-06	-58.859	6.08e-08	-2
ISLR	0.70068	6.62e-08	60.671	3.02e-08	2
ITGA8	0.57602	8.23e-06	46.725	6.3e-06	2
ITGAV	0.44026	0.00075829	39.745	8.01e-05	2
ITGB1	0.62109	1.46e-06	53.723	4.41e-07	2
ITGB1BP1	-0.54351	2.76e-05	-50.094	1.75e-06	-2
ITGB4	1.4662	0	Inf	0	4
ITGB8	0.78874	1.27e-09	70.411	6.62e-10	2
ITM2A	0.80163	6.39e-10	72.761	2.62e-10	2
ITPKA	-1.3057	0	-135.86	0	-4
ITPKB	1.0984	0	110.61	0	4
ITSN2	0.51088	8.16e-05	46.631	6.52e-06	2
IZUMO4	0.84897	5.92e-11	77.283	4.3e-11	3
JAKMIP1	-0.57291	9.69e-06	-52.996	5.8e-07	-2
JUP	0.52548	5.19e-05	45.497	9.9e-06	2
KANK1	0.74673	7.17e-09	66.241	3.47e-09	2
KAT2B	0.75827	5.92e-09	71.434	4.45e-10	2
KAT6A	0.62667	1.21e-06	52.476	7.11e-07	2
KAZALD1	-0.48604	0.00018183	-36.989	0.00021051	-2
KCNA4	-0.66454	2.66e-07	-54.727	3e-07	-2
KCNA6	-0.95975	2.76e-13	-94.596	4.21e-14	-2
KCND2	-0.44591	0.00067519	-45.841	8.74e-06	-2
KCNF1	-1.076	0	-105.95	0	-3
KCNG1	-1.4601	0	-161.35	0	-3
KCNJ3	-0.62283	1.71e-06	-66.438	3.2e-09	-2
KCNJ6	-1.0046	1.65e-14	-91.848	1.28e-13	-3
KCNJ9	-0.72042	3.16e-08	-77.655	3.71e-11	-4
KCNK1	-0.62269	1.52e-06	-56.074	1.82e-07	-2
KCNK2	-0.70259	5.05e-08	-61.081	2.57e-08	-3
KCNK3	-1.1777	0	-117.78	0	-4
KCNN1	-0.59742	4.1e-06	-51.167	1.17e-06	-2
KCNN3	0.549	2.44e-05	54.948	2.76e-07	2
KCNQ2	-0.86683	3.62e-11	-83.084	4.25e-12	-2
KCNS1	0.50375	0.00011419	50.172	1.7e-06	2
KCNS3	-0.62135	1.48e-06	-52.974	5.84e-07	-3
KCNV1	-1.0388	0	-108.55	0	-3
KHK	-0.80134	5.7e-10	-66.167	3.56e-09	-2
KIAA0930	0.82958	1.67e-10	72.896	2.49e-10	3
KIAA1033	0.65727	3.27e-07	55.542	2.22e-07	2
KIAA1462	-0.47009	0.00030946	-39.218	9.64e-05	-2
KIF13B	1.0734	0	108.31	0	3
KIF1C	0.50569	0.00010289	43.447	2.08e-05	2
KIF21B	-0.89908	5.62e-12	-81.132	9.24e-12	-2
KIF2A	-0.45301	0.00056747	-53.192	5.39e-07	-3
KIF3B	-0.89383	8.5e-12	-85.476	1.68e-12	-3
KIF5B	0.55593	1.95e-05	55.112	2.6e-07	2
KIT	-0.46102	0.00042439	-42.551	2.9e-05	-2
KITLG	-0.60402	2.85e-06	-49.433	2.25e-06	-2
KLHDC3	-0.82336	2.61e-10	-79.157	2.06e-11	-2
KLK6	0.60077	3.56e-06	53.12	5.54e-07	2
KLKB1	0.49586	0.00012554	38.239	0.00013501	2
KTN1	0.46718	0.0003514	51.416	1.07e-06	2
LAMB1	-0.64356	5.74e-07	-52.954	5.87e-07	-2
LAMP2	1.2667	0	Inf	0	3
LAPTM4A	0.68741	1.08e-07	63.677	9.32e-09	3
LDB2	-0.62951	1.21e-06	-56.223	1.72e-07	-2
LDB3	0.47124	0.00027849	37.577	0.00017086	2
LGALS3BP	0.75255	5.79e-09	64.429	6.92e-09	2
LGMN	-0.55059	2.01e-05	-47.633	4.44e-06	-2
LIFR	0.7764	2.26e-09	70.195	7.21e-10	2
LIG4	-0.8273	1.68e-10	-73.942	1.65e-10	-3
LIMK2	0.65895	4.04e-07	59.775	4.28e-08	2
LIPE	0.55901	1.71e-05	49.662	2.06e-06	2
LITAF	1.0003	3.14e-14	97.208	1.46e-14	3
LMAN1	0.74133	1.02e-08	63.549	9.81e-09	2
LMO4	-0.50781	0.00010289	-52.197	7.91e-07	-2
LMO7	-0.52843	4.46e-05	-45.588	9.6e-06	-2
LMTK2	-0.48861	0.00016747	-39.922	7.53e-05	-2
LPAR1	0.8693	2.55e-11	79.29	1.97e-11	2
LPIN1	0.92065	1.62e-12	82.933	4.5e-12	2
LPL	1.5078	0	Inf	0	5
LRIG1	0.91242	3.6e-12	92.394	1.01e-13	4
LRP10	0.71669	3.41e-08	73.382	2.09e-10	3
LRP2	1.0198	1.65e-14	109.6	0	2
LRPAP1	-0.55971	1.49e-05	-45.506	9.88e-06	-3
LRRC32	0.68532	1.16e-07	62.029	1.77e-08	3
LRRTM2	-0.60911	2.3e-06	-48.729	2.93e-06	-2
LSM3	-0.62801	1.13e-06	-50.665	1.42e-06	-2
LYPLA1	-0.5528	1.99e-05	-49.508	2.19e-06	-2
MACF1	0.45022	0.00054212	40.296	6.57e-05	2
MAD2L1BP	-0.66212	2.71e-07	-56.197	1.74e-07	-3
MAG	0.6992	6.62e-08	62.481	1.5e-08	2
MAGI1	-1.2279	0	-127.02	0	-4
MAL	0.68616	1.56e-07	77.092	4.65e-11	3
MAN1A1	-1.0259	0	-101.85	0	-3
MAN2A1	0.4374	0.00089602	43.653	1.93e-05	2
MAN2A2	0.57858	7.8e-06	53.305	5.16e-07	2
MAOB	0.82206	2.23e-10	72.435	3.01e-10	2
MAP2	-0.57078	1.24e-05	-68.362	1.49e-09	-2
MAP2K6	-0.44063	0.0007959	-45.29	1.07e-05	-2
MAP3K5	0.61425	1.93e-06	54.079	3.85e-07	2
MAP4K4	0.60385	2.75e-06	47.697	4.33e-06	3
MAP7	0.92953	1.39e-12	87.342	7.98e-13	2
MAPK1	-0.74184	9.98e-09	-71.26	4.72e-10	-3
MAPK3	0.48069	0.00023729	53.831	4.25e-07	2
MAPK8	-0.65169	4.71e-07	-63.419	1.03e-08	-2
MAPK8IP1	-0.56626	1.31e-05	-48.869	2.79e-06	-2
MAPRE1	0.56069	1.44e-05	48.583	3.1e-06	2
MAPRE2	-0.43891	0.00082599	-46.361	7.24e-06	-2
MCAT	-0.81959	2.32e-10	-69.478	9.57e-10	-3
MCF2L2	1.0303	0	103.23	0	2
MCM7	0.63788	7.99e-07	54.067	3.87e-07	2
MDH2	-0.45749	0.00046686	-41.367	4.47e-05	-2
MDN1	0.9946	3.14e-14	91.688	1.33e-13	2
MED12	0.72406	1.94e-08	59.585	4.6e-08	2
MED8	-0.5587	1.62e-05	-52.848	6.12e-07	-2
MEF2C	-0.55215	2.31e-05	-57.426	1.08e-07	-2
MEF2D	-0.59371	4.28e-06	-53.462	4.87e-07	-2
MEST	-0.47683	0.00023591	-36.04	0.0002936	-2
METAP1	-0.63391	8.91e-07	-51.248	1.14e-06	-2
METTL13	-0.54092	3.13e-05	-50.714	1.39e-06	-2
MGLL	-0.49177	0.00016634	-42.15	3.36e-05	-2
MGST2	0.65843	3.8e-07	58.712	6.45e-08	2
MICAL3	0.80983	3.52e-10	67.768	1.88e-09	2
MLC1	0.70451	5.32e-08	67.791	1.86e-09	3
MLF1	-0.74274	8.23e-09	-61.086	2.57e-08	-2
MMD	-1.5421	0	-171.35	0	-5
MN1	-0.96689	1.53e-13	-91.78	1.28e-13	-4
MOBP	0.73521	1.25e-08	64.641	6.36e-09	3
MOG	0.62858	1.24e-06	54.75	2.98e-07	2
MPPED2	-0.51939	6.38e-05	-43.683	1.91e-05	-2
MRPL28	-0.99305	3.14e-14	-94.304	4.79e-14	-4
MRPL3	-0.64675	5.2e-07	-55.708	2.09e-07	-3
MRPL33	-0.58616	5.69e-06	-51.492	1.04e-06	-2
MRPL9	-0.44611	0.00061658	-40.941	5.21e-05	-2
MRPS12	-0.81369	3.08e-10	-70.592	6.13e-10	-3
MT1E	0.86257	4.54e-11	93.649	6.01e-14	4
MT1F	0.77896	2.53e-09	84.888	2.08e-12	3
MT1G	0.70988	4.79e-08	75.367	9.29e-11	3
MT1H	0.52754	6.02e-05	65.917	3.93e-09	3
MT1X	0.88706	1.15e-11	88.683	4.56e-13	3
MT2A	0.82192	3.13e-10	87.221	8.37e-13	3
MTM1	0.76625	3.54e-09	70.777	5.73e-10	3
MTMR11	0.53027	4.34e-05	46.212	7.64e-06	3
MTRR	0.65785	3.45e-07	57.592	1.01e-07	2
MVP	0.75152	5.75e-09	65.352	4.85e-09	3
MXI1	0.52108	6.68e-05	60.253	3.56e-08	2
MYL12B	-0.63392	9.87e-07	-57.272	1.15e-07	-3
MYLK	0.90304	3.84e-12	79.764	1.62e-11	3
MYO10	0.70755	4.4e-08	66.026	3.78e-09	3
MYO1B	-1.0311	0	-102.85	0	-4
MYO1E	0.80931	5.35e-10	76.459	5.99e-11	2
MYO5A	-0.53387	4.14e-05	-55.929	1.92e-07	-2
MYO6	0.79565	7.9e-10	71.287	4.68e-10	2
MYO9B	0.7907	1.15e-09	70.991	5.25e-10	3
MYOF	0.50782	9.67e-05	51.568	1.01e-06	3
MYT1L	-0.56206	1.63e-05	-57.187	1.19e-07	-2
N4BP2L1	0.52545	5.09e-05	41.469	4.31e-05	2
NAALAD2	0.56487	1.34e-05	47.09	5.48e-06	2
NAB1	0.68402	1.12e-07	56.681	1.44e-07	2
NACC2	0.57805	9.28e-06	59.279	5.16e-08	2
NAV3	-0.57776	9.69e-06	-59.22	5.28e-08	-3
NCALD	-0.58642	6.24e-06	-54.329	3.49e-07	-3
NCAM2	-0.72537	2.39e-08	-65.011	5.51e-09	-3
NCKIPSD	0.73859	1.25e-08	64.079	7.94e-09	2
NDN	-0.93334	9.08e-13	-86.194	1.25e-12	-4
NDP	0.60255	3.27e-06	55.732	2.07e-07	3
NDUFA9	-0.6049	2.84e-06	-53.387	5.01e-07	-3
NDUFB3	-0.48004	0.00023057	-41.171	4.79e-05	-2
NDUFB5	-0.51142	7.84e-05	-41.737	3.92e-05	-2
NDUFB6	-0.63163	1.01e-06	-53.543	4.72e-07	-3
NDUFS4	-0.45942	0.00044212	-42.991	2.46e-05	-2
NEBL	0.6297	1.2e-06	62.605	1.42e-08	3
NEK1	0.72646	1.81e-08	63.123	1.15e-08	2
NEK2	-0.97883	1.01e-13	-104.3	0	-4
NEK3	0.6462	5.37e-07	55.328	2.4e-07	2
NEK7	0.48915	0.00017122	47.917	3.98e-06	2
NEK9	0.75157	6.62e-09	71.306	4.65e-10	4
NELL1	-0.55626	1.64e-05	-46.071	8.03e-06	-2
NELL2	-0.52434	5.09e-05	-44.491	1.43e-05	-2
NFATC3	0.58296	6.75e-06	49.538	2.16e-06	2
NFE2L2	0.7136	3.49e-08	65.325	4.88e-09	2
NFKB1	0.57077	9.77e-06	46.873	5.95e-06	2
NFKBIA	0.80865	4.8e-10	77.744	3.58e-11	3
NFKBIE	-0.7221	2.32e-08	-68.246	1.54e-09	-3
NHP2	-0.88235	1.24e-11	-79.168	2.06e-11	-4
NIPSNAP1	-0.57006	1.08e-05	-48.079	3.75e-06	-2
NKTR	0.79846	7.59e-10	68.065	1.66e-09	2
NMU	-1.1114	0	-113.04	0	-4
NNAT	-0.86758	2.8e-11	-80.813	1.05e-11	-3
NOL4	-0.84785	7.55e-11	-84.252	2.71e-12	-3
NOP16	-0.66316	2.59e-07	-51.718	9.51e-07	-2
NOTCH2	0.59364	4.74e-06	57.084	1.23e-07	3
NOV	-0.70474	4.35e-08	-56.863	1.34e-07	-3
NPC1	0.87112	2.4e-11	84.235	2.71e-12	2
NPC2	0.88398	1.27e-11	86.829	9.85e-13	3
NPM3	-0.81692	3.06e-10	-74.546	1.29e-10	-2
NPPA	-1.2508	0	-129.11	0	-3
NPTN	-0.47158	0.00028699	-41.709	3.95e-05	-2
NPY5R	-0.51055	8.47e-05	-48.835	2.82e-06	-2
NR2C1	0.67485	1.83e-07	60.027	3.89e-08	3
NR3C2	0.66092	2.96e-07	54.154	3.74e-07	2
NRGN	-0.63346	9.09e-07	-53.038	5.7e-07	-3
NRXN1	-0.70261	5.55e-08	-66.83	2.76e-09	-2
NRXN3	-0.68223	1.27e-07	-60.633	3.06e-08	-2
NT5C2	0.43997	0.00076575	42.647	2.8e-05	2
NTNG1	-0.96548	1.4e-13	-88.137	5.67e-13	-3
NTSR2	0.67613	1.71e-07	60.903	2.76e-08	2
NUDT21	-0.58567	6.92e-06	-66.578	3.04e-09	-2
NUMA1	0.69787	6.13e-08	59.31	5.1e-08	4
NUP160	0.69995	6.43e-08	61.815	1.93e-08	3
NUP188	0.67084	1.81e-07	52.218	7.84e-07	2
NUP214	0.53757	3.2e-05	41.695	3.97e-05	2
NUPR1	1.064	0	110.85	0	4
NXPH2	-0.78096	1.64e-09	-69.139	1.1e-09	-2
NXT2	0.59213	4.83e-06	55.922	1.92e-07	3
OAZ1	-0.54444	2.47e-05	-45.078	1.15e-05	-2
OFD1	1.0007	1.65e-14	93.291	7.11e-14	3
OGDH	0.47338	0.00027332	39.813	7.82e-05	2
OGG1	-0.64439	8.79e-07	-69.455	9.62e-10	-2
OLFM1	-1.5683	0	-181.41	0	-4
OSMR	0.6011	3.47e-06	50.873	1.31e-06	2
OXCT1	-0.6224	1.39e-06	-51.933	8.79e-07	-2
P2RX5	-1.1854	0	-117.55	0	-3
P2RY14	0.63972	6.46e-07	50.438	1.54e-06	2
PADI2	0.71125	3.41e-08	61.784	1.95e-08	3
PAICS	0.54993	2e-05	42.14	3.37e-05	2
PAIP2B	0.68355	1.27e-07	65.876	3.98e-09	3
PAK1	-0.65757	4.36e-07	-74.725	1.2e-10	-2
PAK2	0.65606	3.92e-07	56.918	1.31e-07	2
PAN2	0.83656	1.22e-10	76.596	5.69e-11	2
PANK3	-1.0355	0	-105.02	0	-3
PANX1	-0.51929	7.02e-05	-51.705	9.55e-07	-2
PARP4	0.50273	0.00010767	45.186	1.11e-05	2
PAX6	0.52167	5.66e-05	45.558	9.71e-06	3
PBXIP1	0.59897	3.86e-06	59.641	4.51e-08	2
PC	0.61123	2.48e-06	61.658	2.05e-08	2
PCBD1	0.43774	0.00083607	46.961	5.74e-06	2
PCBP4	0.92199	1.65e-12	84.31	2.65e-12	3
PCDH7	-0.56863	1.26e-05	-51.013	1.24e-06	-2
PCDH8	-0.78318	1.75e-09	-76.52	5.87e-11	-2
PCF11	0.52525	5.5e-05	55.949	1.9e-07	2
PCLO	-0.61766	1.82e-06	-55.157	2.56e-07	-3
PCMT1	-0.72684	1.99e-08	-71.309	4.65e-10	-3
PDCD2	-0.5021	0.00010506	-39.171	9.8e-05	-2
PDE2A	-0.83071	1.46e-10	-74.437	1.35e-10	-4
PDE6D	-0.65363	3.8e-07	-54.142	3.75e-07	-2
PDE8A	0.82524	2.15e-10	77.416	4.08e-11	2
PDE8B	-0.60226	3.51e-06	-54.97	2.74e-07	-3
PDGFRA	-0.92313	1.51e-12	-81.234	8.94e-12	-2
PDGFRB	0.57138	1.01e-05	48.866	2.79e-06	2
PDHB	-0.68211	1.38e-07	-62.229	1.64e-08	-2
PDIA2	0.54669	2.27e-05	41.379	4.45e-05	2
PDK3	-0.61731	1.73e-06	-55.339	2.39e-07	-2
PDK4	0.75879	7.69e-09	78.402	2.75e-11	2
PDLIM4	0.52103	6.05e-05	45.178	1.11e-05	2
PDLIM5	0.67661	1.75e-07	62.672	1.39e-08	2
PECAM1	0.68795	1.08e-07	63.24	1.11e-08	2
PENK	-1.3407	0	-143.44	0	-4
PEX5	-0.67498	1.81e-07	-62.468	1.5e-08	-3
PGM3	0.44323	0.00075857	47.9	4e-06	2
PHACTR4	0.44714	0.00061486	44.727	1.32e-05	2
PHF1	0.63183	1.11e-06	64.076	7.94e-09	2
PHF14	-0.79419	7.59e-10	-65.334	4.87e-09	-2
PHGDH	0.67789	1.56e-07	59.92	4.06e-08	2
PHKA2	0.66814	2.11e-07	55.145	2.57e-07	2
PIK3C2G	-0.85916	3.21e-11	-72.795	2.59e-10	-2
PIM2	-0.72957	1.56e-08	-64.343	7.16e-09	-3
PIN1	-0.76314	3.62e-09	-67.756	1.88e-09	-3
PIP4K2A	0.78588	1.76e-09	86.985	9.24e-13	4
PIP5K1B	-0.88837	9.37e-12	-82.398	5.54e-12	-2
PITPNA	-0.56692	1.21e-05	-51.886	8.91e-07	-2
PITPNB	-0.59442	4.63e-06	-62.001	1.79e-08	-2
PKD2	1.0612	0	99.266	7.69e-15	3
PKIG	-0.69561	6.72e-08	-57.045	1.25e-07	-2
PKN1	0.55386	1.92e-05	50.061	1.77e-06	2
PLA2G16	0.8759	1.85e-11	86.289	1.22e-12	2
PLA2G5	-0.70068	5.41e-08	-55.698	2.09e-07	-2
PLCB1	-0.59423	6.04e-06	-66.911	2.68e-09	-2
PLCB4	-0.80056	6.87e-10	-71.862	3.8e-10	-2
PLCE1	0.54366	2.52e-05	44.124	1.64e-05	2
PLCL2	-0.65583	4.52e-07	-68.295	1.52e-09	-3
PLD1	0.57399	9.05e-06	46	8.25e-06	2
PLD2	0.7059	4.28e-08	58.947	5.86e-08	3
PLD3	-0.62072	1.5e-06	-53.327	5.13e-07	-2
PLEC	0.50048	0.00012192	50.305	1.62e-06	2
PLEKHB1	0.46966	0.00033333	44.516	1.42e-05	2
PLEKHB2	-0.51731	7.28e-05	-53.552	4.71e-07	-2
PLEKHG3	0.54941	2.23e-05	44.923	1.22e-05	2
PLEKHM2	0.49728	0.00013225	50.093	1.75e-06	2
PLIN3	0.65123	5.2e-07	60.919	2.74e-08	3
PLK2	-0.80062	7.16e-10	-74.4	1.37e-10	-2
PLLP	0.77919	2.01e-09	75.047	1.05e-10	2
PLOD2	0.81936	3.11e-10	80.608	1.14e-11	4
PLOD3	0.57064	1.17e-05	53.802	4.29e-07	2
PLP1	0.68636	1.24e-07	66.505	3.14e-09	3
PLP2	0.67493	2.01e-07	61.543	2.13e-08	3
PLS1	-0.52828	4.2e-05	-39.091	0.0001008	-2
PLSCR1	0.63584	8.32e-07	52.363	7.41e-07	2
PLTP	0.87906	1.84e-11	87.655	6.99e-13	3
PLXDC1	-0.72444	2.03e-08	-62.476	1.5e-08	-2
PLXDC2	0.4679	0.000335	43.284	2.21e-05	2
PLXNB1	0.88289	1.23e-11	83.399	3.76e-12	2
PLXNB2	0.72934	1.75e-08	67.086	2.5e-09	3
PLXND1	-0.67043	2.04e-07	-53.094	5.59e-07	-2
PMM1	-0.8003	6.39e-10	-73.165	2.26e-10	-2
PMP22	0.7398	1.23e-08	71.563	4.26e-10	3
PNOC	-1.3972	0	-154.94	0	-4
PNRC1	0.63462	9.05e-07	56.667	1.45e-07	3
POLB	-0.56331	1.31e-05	-48.944	2.72e-06	-2
PON2	0.75435	6.02e-09	73.082	2.34e-10	4
PPEF1	-1.176	0	-116.25	0	-3
PPM1E	-0.95513	3.31e-13	-93.149	7.11e-14	-3
PPP1CA	-0.51992	6.35e-05	-43.949	1.74e-05	-2
PPP1R11	-0.69882	9.02e-08	-68.589	1.36e-09	-2
PPP1R1A	-0.59189	4.58e-06	-49.953	1.84e-06	-2
PPP2CA	-0.56754	1.39e-05	-59.845	4.18e-08	-2
PPP2R5C	-0.52155	5.54e-05	-43.315	2.18e-05	-2
PPP2R5E	-0.4905	0.00017202	-47.202	5.25e-06	-2
PPP4R1	0.46387	0.00035959	36.765	0.00022662	2
PRELP	0.67453	1.82e-07	59.058	5.64e-08	3
PRKCB	-0.83384	1.85e-10	-92.652	8.97e-14	-5
PRKCD	-1.0995	0	-104.53	0	-4
PRKCG	-0.54341	3.14e-05	-56.774	1.39e-07	-2
PRKCI	-0.63335	1.29e-06	-65.363	4.83e-09	-2
PRKCZ	-0.62651	1.24e-06	-57.801	9.24e-08	-3
PRKD3	0.48969	0.00017743	46.376	7.2e-06	3
PRKG2	-1.3287	0	-141.3	0	-2
PROM1	-0.61915	1.53e-06	-47.413	4.83e-06	-2
PRPS2	-0.77888	1.75e-09	-70.107	7.43e-10	-3
PRRG1	0.68937	9.42e-08	59.871	4.14e-08	2
PRUNE2	0.81375	5.05e-10	76.789	5.27e-11	2
PSMA5	-0.51102	8.33e-05	-45.741	9.07e-06	-2
PSMB6	-0.46391	0.0003738	-39.041	0.00010257	-2
PSMD7	-0.57701	9.09e-06	-60.694	3e-08	-3
PSMD8	-0.77871	1.83e-09	-73.374	2.09e-10	-3
PSME3	-0.52526	5.36e-05	-48.303	3.44e-06	-2
PSTPIP1	0.43453	0.0008672	34.669	0.00047702	2
PTGDS	0.78915	1.19e-09	69.317	1.02e-09	2
PTGER3	-0.82509	2.24e-10	-75.014	1.06e-10	-3
PTGES	-0.51017	8.76e-05	-50.169	1.7e-06	-2
PTGIS	-0.75663	4.52e-09	-62.382	1.55e-08	-2
PTHLH	-1.6268	0	-185.8	0	-4
PTK2	0.78195	2.13e-09	71.709	4.02e-10	2
PTK2B	0.72997	1.93e-08	65.802	4.09e-09	2
PTPN13	0.45789	0.00043147	39.256	9.52e-05	2
PTPN21	0.53426	4.06e-05	46.304	7.38e-06	2
PTPN3	-0.56198	1.45e-05	-50.569	1.47e-06	-2
PTPN4	-0.77905	1.76e-09	-71.486	4.36e-10	-3
PTPRK	0.53674	3.37e-05	48.247	3.51e-06	2
PTPRN	-0.90627	3.99e-12	-85.035	1.96e-12	-3
PTPRN2	-0.73182	2e-08	-71.21	4.79e-10	-2
PTPRO	-0.85523	4.33e-11	-77.96	3.31e-11	-2
PTPRR	-1.1953	0	-123.48	0	-3
PTPRT	0.58998	5.54e-06	55.534	2.22e-07	3
PURA	0.72114	2.59e-08	72.041	3.53e-10	3
PWP1	-0.56879	1.06e-05	-49.058	2.6e-06	-2
PXDC1	0.57314	1.05e-05	52.841	6.14e-07	2
PYGB	0.652	4.1e-07	55.123	2.59e-07	2
QDPR	1.145	0	118.43	0	4
QKI	0.81387	4.19e-10	80.676	1.11e-11	3
R3HCC1	-0.75574	5.08e-09	-64.035	8.07e-09	-2
RAB13	0.73263	1.61e-08	68.607	1.35e-09	3
RAB27A	0.51621	6.82e-05	42.586	2.87e-05	2
RAB27B	-0.6179	1.66e-06	-51.991	8.59e-07	-2
RAB31	0.62048	1.69e-06	59.533	4.7e-08	3
RAB33A	-0.59528	3.9e-06	-50.902	1.29e-06	-2
RAB35	-0.67669	1.65e-07	-58.822	6.17e-08	-3
RAB36	-0.55055	2.28e-05	-51.912	8.83e-07	-3
RAB3A	-0.5493	2.19e-05	-48.744	2.92e-06	-2
RAB3B	-0.68078	1.3e-07	-56.601	1.49e-07	-2
RAB40B	-0.60312	2.96e-06	-47.34	4.97e-06	-2
RAB40C	-0.89173	6.82e-12	-81.64	7.67e-12	-3
RAB6B	-0.6069	2.75e-06	-54.305	3.52e-07	-2
RABGAP1	0.7147	3.07e-08	61.308	2.35e-08	2
RAC3	-0.45592	0.00044974	-38.413	0.00012737	-2
RAD1	-0.55501	1.98e-05	-55.487	2.26e-07	-2
RAD23B	-0.44879	0.00060174	-42.072	3.46e-05	-2
RALGDS	0.54666	2.41e-05	47.544	4.6e-06	2
RAMP1	0.48353	0.00021728	55.375	2.37e-07	3
RAP1GDS1	-0.6553	3.92e-07	-57.143	1.21e-07	-2
RAP2B	-0.98768	6.09e-14	-92.296	1.06e-13	-2
RAPGEF3	0.52777	4.57e-05	44.492	1.43e-05	2
RARB	-0.85758	4.33e-11	-78.375	2.77e-11	-3
RARRES3	1.2102	0	121.04	0	4
RASGRF1	-0.86409	3.77e-11	-85.748	1.5e-12	-3
RASGRP1	-1.1014	0	-111.42	0	-3
RASL10A	-1.0631	0	-104.06	0	-4
RASSF2	0.93782	1.01e-12	96.617	1.46e-14	3
RBBP8	0.53496	3.65e-05	44.146	1.62e-05	2
RBL2	0.63361	8.46e-07	51.918	8.82e-07	2
RBM6	0.62078	1.43e-06	49.157	2.51e-06	2
RBP4	-0.68678	9.66e-08	-58.578	6.78e-08	-2
RBPJ	0.50171	0.0001173	50.922	1.28e-06	2
RDX	0.45164	0.00056417	49.698	2.03e-06	2
REEP1	-0.47937	0.00023612	-41.768	3.88e-05	-2
REEP5	-0.47773	0.00025026	-45.978	8.32e-06	-2
RELN	-0.89981	5.04e-12	-82.148	6.16e-12	-2
RFC3	-1.0343	0	-101.45	0	-4
RFK	-0.63983	8.39e-07	-61.615	2.07e-08	-2
RFX4	0.75564	5.42e-09	67.341	2.24e-09	3
RGS14	-0.74857	9.12e-09	-72.192	3.31e-10	-2
RGS4	-0.65934	3.75e-07	-68.655	1.33e-09	-3
RGS6	-0.74063	9.4e-09	-65.732	4.18e-09	-3
RHOBTB2	-0.64898	6.18e-07	-64.336	7.17e-09	-2
RHOBTB3	1.2336	0	137.02	0	5
RHOG	0.58056	7.92e-06	59.953	4.01e-08	2
RHOQ	0.67558	2.01e-07	68.808	1.25e-09	4
RIMBP2	-0.79625	8.08e-10	-71.696	4.03e-10	-3
RIMS1	-1.4743	0	-164.54	0	-4
RIT2	-0.89947	5.07e-12	-81.756	7.31e-12	-3
RNASE1	0.51032	8.91e-05	50.58	1.46e-06	2
RND1	-0.91583	2.36e-12	-90.903	1.86e-13	-5
RND2	0.71942	4.49e-08	83.707	3.34e-12	3
RNF11	-0.49875	0.00013235	-50.558	1.47e-06	-2
RNF114	0.68916	9.68e-08	59.491	4.75e-08	2
RNF13	0.61455	2.49e-06	65.8	4.09e-09	2
RNF14	-0.48718	0.00019155	-49.796	1.95e-06	-2
RNF2	-0.61691	1.85e-06	-51.14	1.18e-06	-2
RNFT2	-0.57883	7.79e-06	-50.966	1.26e-06	-2
ROM1	0.88211	1.47e-11	83.951	3.03e-12	4
ROS1	0.89565	1.12e-11	90.424	2.29e-13	2
RPGR	0.72023	2.22e-08	61.723	1.99e-08	3
RPH3A	-0.53365	3.9e-05	-48.019	3.83e-06	-3
RPL39L	-0.87668	1.37e-11	-76.377	6.18e-11	-2
RPS4X	0.61567	2.32e-06	59.032	5.68e-08	2
RPS6	0.59877	3.64e-06	53.994	3.98e-07	3
RPS6KA2	0.77137	2.2e-09	63.181	1.14e-08	2
RPS6KA3	-0.56043	1.47e-05	-50.623	1.44e-06	-2
RPS6KA5	0.901	4.02e-12	79.676	1.68e-11	3
RRAS	0.46112	0.00039881	39.04	0.00010257	2
RRBP1	0.58051	6.8e-06	45.971	8.33e-06	2
RTN1	-0.46796	0.00032468	-44.07	1.67e-05	-2
RXRA	0.49614	0.00012931	43.393	2.12e-05	2
RYK	0.76729	3.11e-09	68.277	1.53e-09	3
RYR1	0.72613	1.78e-08	60.929	2.73e-08	2
RYR3	0.55306	1.9e-05	46.775	6.19e-06	2
S100A11	0.46584	0.0003469	43.407	2.11e-05	2
S100A8	0.62789	1.21e-06	54.823	2.89e-07	2
S100A9	0.55157	1.94e-05	45.853	8.71e-06	2
SAFB2	0.7478	7.17e-09	65.516	4.56e-09	2
SAMD14	0.51796	6.58e-05	42.226	3.27e-05	2
SASH1	0.85576	5.06e-11	80.377	1.25e-11	2
SCAF11	0.71928	2.48e-08	65.766	4.12e-09	4
SCAI	-0.57816	7.92e-06	-51.122	1.19e-06	-2
SCARB2	0.43084	0.00096631	34.025	0.00059726	2
SCG2	-0.76035	4.2e-09	-68.369	1.49e-09	-3
SCG5	-0.50927	8.54e-05	-43.598	1.97e-05	-2
SDC2	0.59207	6.27e-06	63.918	8.46e-09	2
SDC4	1.0543	0	101.18	0	3
SDHB	-0.47831	0.00024432	-47.087	5.48e-06	-2
SEC14L5	0.69554	7.62e-08	65.279	4.96e-09	3
SEC23IP	-0.62917	1.09e-06	-55.053	2.65e-07	-2
SEC61G	-0.65624	3.64e-07	-56.944	1.3e-07	-2
SELENBP1	0.44265	0.00075768	53.579	4.67e-07	2
SEMA4D	0.62681	1.3e-06	52.319	7.55e-07	2
SEMA4F	-0.51551	6.66e-05	-40.77	5.53e-05	-2
SEMA6A	0.85933	5.32e-11	91.32	1.54e-13	2
SEPHS2	-0.52167	5.44e-05	-39.513	8.73e-05	-2
SEPW1	-0.46764	0.00032994	-40.817	5.43e-05	-2
SERINC3	-0.7705	2.82e-09	-71.729	3.99e-10	-4
SERINC5	0.44239	0.00072582	46.206	7.66e-06	2
SERPINA3	0.90577	4.1e-12	81.525	8.04e-12	2
SERPINB1	0.57854	8.01e-06	52.309	7.57e-07	2
SERPINB2	-0.60477	3.01e-06	-58.988	5.77e-08	-2
SERPINB9	0.60443	3.07e-06	56.792	1.38e-07	3
SERPINF1	-0.54798	2.29e-05	-48.38	3.35e-06	-2
SETX	0.49193	0.00015305	44.721	1.32e-05	2
SEZ6L	-0.71256	3.3e-08	-61.636	2.06e-08	-2
SFI1	0.66235	2.6e-07	50.94	1.28e-06	2
SFRP1	0.72348	2.63e-08	77.379	4.13e-11	3
SGK1	1.1468	0	Inf	0	3
SGSH	0.62433	1.25e-06	51.309	1.11e-06	2
SHANK2	-0.84565	7.54e-11	-75.838	7.79e-11	-2
SIAH2	-0.77428	2.46e-09	-67.992	1.71e-09	-3
SIKE1	-0.47519	0.00024843	-39.453	8.89e-05	-2
SLBP	-0.69855	6.62e-08	-59.526	4.7e-08	-2
SLC13A3	0.93972	7.59e-13	85.402	1.72e-12	2
SLC14A1	1.0919	0	108.44	0	3
SLC16A2	-0.79298	1.18e-09	-73.075	2.34e-10	-3
SLC1A6	-1.1494	0	-116.31	0	-4
SLC22A5	0.51429	7.18e-05	44.024	1.7e-05	2
SLC25A1	0.50298	0.00011959	55.625	2.14e-07	2
SLC25A11	-0.54566	2.41e-05	-45.542	9.76e-06	-3
SLC25A14	-0.45676	0.00046696	-44.006	1.71e-05	-2
SLC25A4	-0.56664	1.18e-05	-51.201	1.16e-06	-2
SLC25A44	-0.54198	2.9e-05	-47.668	4.38e-06	-2
SLC25A46	-0.62704	1.29e-06	-60.483	3.26e-08	-2
SLC29A1	-0.59338	4.42e-06	-50.371	1.58e-06	-2
SLC30A3	-0.77395	2.17e-09	-65.895	3.95e-09	-2
SLC30A9	-0.76412	4.25e-09	-73.19	2.24e-10	-2
SLC31A2	0.77514	2.64e-09	72.976	2.44e-10	2
SLC35B1	-0.69802	6.67e-08	-58.695	6.49e-08	-3
SLC35D2	0.45404	0.00048785	36.124	0.00028468	2
SLC36A1	-0.58843	5.81e-06	-52.172	7.99e-07	-2
SLC46A3	0.45624	0.00054481	50.326	1.6e-06	2
SLC6A8	0.46059	0.00043537	50.446	1.54e-06	2
SLC7A11	0.58457	6.27e-06	49.236	2.43e-06	2
SLC7A2	0.56109	1.67e-05	53.589	4.66e-07	2
SLC7A8	-0.4952	0.00014011	-45.041	1.17e-05	-2
SLC8A2	-0.95504	2.76e-13	-86.232	1.24e-12	-3
SLC9A3R1	0.4634	0.00036176	38.252	0.00013434	2
SLC9A7	-0.54777	2.37e-05	-48.876	2.78e-06	-2
SLCO2A1	-0.89614	5.9e-12	-81.122	9.25e-12	-2
SLCO3A1	0.66392	2.72e-07	55.458	2.29e-07	2
SLIT1	-0.57655	8.95e-06	-51.897	8.88e-07	-2
SLIT2	-0.44648	0.0006122	-37.629	0.00016779	-2
SLITRK3	-0.5987	4.05e-06	-53.344	5.1e-07	-2
SLN	-1.0187	0	-93.958	5.38e-14	-3
SMAD3	-0.92127	1.54e-12	-83.15	4.14e-12	-2
SMAD5	0.77189	2.85e-09	73.535	1.97e-10	4
SMARCC1	0.66858	2.22e-07	54.574	3.18e-07	2
SMARCD2	0.58993	5.25e-06	49.027	2.63e-06	2
SMC1A	0.53549	3.73e-05	47.001	5.65e-06	2
SMG6	0.56541	1.21e-05	45.981	8.31e-06	2
SMOX	0.68717	1.21e-07	63.134	1.15e-08	2
SNAP23	0.72971	1.85e-08	67.987	1.71e-09	3
SNRNP70	0.51824	6.35e-05	43.64	1.94e-05	2
SNRPB	-0.50673	9.44e-05	-42.065	3.47e-05	-2
SNUPN	-0.55639	1.67e-05	-46.165	7.76e-06	-2
SNX3	-0.85249	4.82e-11	-76.79	5.27e-11	-3
SNX4	-0.55293	1.98e-05	-49.942	1.85e-06	-2
SOCS2	-0.51605	7.01e-05	-41.454	4.33e-05	-2
SOCS7	-0.62115	1.7e-06	-57.916	8.84e-08	-3
SORBS1	0.50442	0.00010289	46.154	7.78e-06	2
SORBS3	0.82343	2.57e-10	78.54	2.6e-11	3
SOX10	0.5484	2.49e-05	57.145	1.21e-07	2
SOX15	0.50032	0.00011184	40.981	5.13e-05	2
SOX9	0.58812	5.22e-06	50.664	1.42e-06	3
SP1	0.62603	1.31e-06	56.341	1.64e-07	3
SPA17	-0.59873	3.39e-06	-47.571	4.55e-06	-2
SPAG6	-0.71914	2.38e-08	-61.349	2.31e-08	-2
SPAG7	-0.53422	3.6e-05	-41.288	4.59e-05	-2
SPEF1	-0.76347	3.24e-09	-64.711	6.2e-09	-3
SPON1	0.67302	2.22e-07	71.541	4.27e-10	4
SPP1	1.057	0	103.85	0	2
SPR	0.58341	6.21e-06	47.003	5.65e-06	2
SQLE	-0.65384	3.71e-07	-51.568	1.01e-06	-2
SRD5A1	-0.97821	1.14e-13	-104.28	0	-3
SREBF1	0.59318	4.11e-06	46.523	6.79e-06	2
SRGN	0.54041	3.07e-05	47.499	4.67e-06	2
SRI	0.69583	7.14e-08	59.364	5e-08	3
SRPK1	-0.43427	0.00085765	-34.82	0.00045247	-2
SRPX	0.44851	0.0006122	43.249	2.23e-05	3
SRRM1	0.46459	0.00037403	48.922	2.74e-06	2
SRRM2	0.5166	7.82e-05	54.432	3.35e-07	3
SSBP2	-0.75057	8.85e-09	-76.711	5.44e-11	-3
SSFA2	1.3617	0	149.5	0	4
SSPN	0.5603	1.54e-05	51.05	1.23e-06	3
SSX2IP	-0.48428	0.00020148	-47.204	5.25e-06	-2
ST13	0.55213	1.88e-05	44.325	1.52e-05	2
ST18	0.92945	1.24e-12	88.165	5.6e-13	2
ST5	0.46879	0.00033615	48.494	3.21e-06	2
ST8SIA3	-0.74903	6.28e-09	-64.821	5.93e-09	-3
ST8SIA4	-0.59873	3.47e-06	-46.662	6.44e-06	-2
ST8SIA5	-0.97547	8.73e-14	-88.962	4.06e-13	-4
STAG2	0.62074	1.57e-06	52.459	7.14e-07	2
STAT3	0.6129	1.99e-06	50.94	1.28e-06	2
STK25	-0.67046	1.91e-07	-52.678	6.55e-07	-2
STK35	0.70701	4.28e-08	57.416	1.08e-07	2
STMN2	-0.70518	4.35e-08	-58.305	7.57e-08	-3
STOM	0.93807	1.04e-12	96.607	1.46e-14	4
STX1A	-1.0078	1.65e-14	-93.204	7.11e-14	-4
SUB1	-0.66904	2.52e-07	-66.475	3.16e-09	-2
SUCLA2	-0.55387	2.18e-05	-61.937	1.83e-08	-2
SUCLG2	0.45197	0.00054925	39.441	8.91e-05	2
SULT4A1	-0.68855	1.05e-07	-57.945	8.74e-08	-2
SUMO1	-0.68002	1.61e-07	-66.322	3.36e-09	-2
SUN2	1.2441	0	135.88	0	3
SUPT4H1	-0.64092	6.15e-07	-50.529	1.49e-06	-2
SVEP1	0.48628	0.00018082	38.519	0.0001226	2
SWAP70	0.54744	2.36e-05	50.621	1.44e-06	2
SYMPK	0.68849	8.68e-08	55.323	2.4e-07	2
SYNGR3	-0.65095	4.44e-07	-53.129	5.52e-07	-2
SYNJ2	0.73843	9.87e-09	60.268	3.54e-08	2
SYPL1	0.62794	1.17e-06	54.749	2.98e-07	3
SYT17	-0.842	1.35e-10	-85.345	1.75e-12	-2
TAC1	-0.75302	5.8e-09	-70.07	7.53e-10	-3
TACC1	0.51662	6.88e-05	44.888	1.23e-05	2
TAF11	-0.48407	0.00020091	-48.62	3.05e-06	-2
TANC2	-0.5901	5.55e-06	-61.249	2.4e-08	-2
TATDN2	-0.66486	2.71e-07	-61.635	2.06e-08	-3
TBC1D9	-0.72727	2.15e-08	-71.384	4.52e-10	-2
TBL1X	0.70703	4.48e-08	66.296	3.39e-09	2
TBPL1	-0.50649	8.89e-05	-37.223	0.00019402	-2
TCF12	0.55906	1.5e-05	46.68	6.41e-06	2
TCF7L2	0.45207	0.00053247	44.199	1.59e-05	2
TCFL5	0.86374	2.8e-11	79.675	1.68e-11	3
TDRD3	0.50548	9.12e-05	38.666	0.00011672	2
TEP1	0.49894	0.00012444	42.904	2.54e-05	2
TF	0.66644	2.65e-07	61.032	2.62e-08	2
TFEB	0.56207	1.63e-05	57.253	1.16e-07	2
TGFB3	0.73548	1.66e-08	71.499	4.34e-10	2
TGFBR1	0.46387	0.00045018	47.354	4.95e-06	2
TGFBR3	0.5389	3.2e-05	49.079	2.58e-06	2
TGM2	0.89286	7.57e-12	85.441	1.7e-12	3
THOC1	0.51167	7.59e-05	40.501	6.11e-05	2
THSD7A	-0.91087	3.4e-12	-82.728	4.83e-12	-3
TIMM17A	-0.68733	1.21e-07	-72.756	2.62e-10	-3
TIMP1	0.86248	4.15e-11	83.985	3.01e-12	2
TIMP3	0.61815	2.06e-06	56.076	1.82e-07	2
TIPARP	0.66198	3.26e-07	64.713	6.2e-09	2
TJP1	0.57887	7.64e-06	51.674	9.67e-07	2
TJP2	0.88134	1.83e-11	88.857	4.25e-13	2
TLE2	0.50501	9.8e-05	39.448	8.9e-05	2
TLE4	0.49028	0.00016767	45.644	9.4e-06	2
TLR2	0.65024	4.66e-07	56.489	1.55e-07	3
TM7SF2	-0.5488	2.36e-05	-48.585	3.1e-06	-2
TM9SF2	-0.54361	3.09e-05	-54.948	2.76e-07	-3
TMCC2	0.52263	6.36e-05	59.829	4.2e-08	3
TMED3	-0.67071	2.43e-07	-65.218	5.07e-09	-3
TMEM123	0.68332	1.21e-07	62.135	1.7e-08	3
TMEM158	-0.91208	3.31e-12	-87.824	6.48e-13	-4
TMEM47	0.59569	3.97e-06	53.048	5.68e-07	2
TMEM63A	0.51344	7.46e-05	44.652	1.35e-05	2
TMEM8B	-1.001	3.14e-14	-99.075	7.69e-15	-4
TNFAIP1	-0.75476	6.67e-09	-70.694	5.92e-10	-3
TNFRSF10B	0.46678	0.00035053	44.734	1.31e-05	2
TNFRSF11A	-0.7422	9.27e-09	-65.478	4.62e-09	-2
TNFRSF11B	0.71136	3.61e-08	62.086	1.74e-08	3
TNFRSF1A	0.51659	7.37e-05	53.05	5.68e-07	2
TNFRSF21	-0.69104	1.08e-07	-71.836	3.82e-10	-3
TNKS	0.60413	2.89e-06	49.097	2.57e-06	3
TNN	-0.4653	0.00033018	-34.434	0.0005181	-2
TNPO1	0.66299	2.6e-07	53.082	5.61e-07	2
TOB1	0.85384	4.78e-11	79.443	1.85e-11	3
TOB2	0.64629	5.15e-07	54.462	3.32e-07	2
TOM1L1	-0.80506	4.89e-10	-67.421	2.17e-09	-2
TOR1A	-0.59467	4.69e-06	-53.741	4.38e-07	-2
TOX3	-1.0857	0	-106.88	0	-3
TP53BP2	0.61831	1.82e-06	58.675	6.53e-08	2
TPBG	-0.83971	1.1e-10	-81.268	8.87e-12	-3
TPD52L1	0.73495	1.38e-08	66.18	3.55e-09	2
TPGS2	-0.6612	3.19e-07	-62.205	1.66e-08	-2
TPM3	-0.52703	4.72e-05	-46.629	6.52e-06	-2
TPP1	0.84768	7.45e-11	84.124	2.84e-12	4
TRA2A	0.53217	4.17e-05	46.664	6.44e-06	2
TRAF3IP2	0.6372	8.12e-07	52.395	7.32e-07	2
TRANK1	0.54753	2.44e-05	44.699	1.33e-05	2
TRIAP1	-0.47949	0.00021667	-36.305	0.00026692	-2
TRIB1	-0.46257	0.00035425	-33.543	0.00070673	-2
TRIB2	-0.84723	7.54e-11	-74.338	1.4e-10	-2
TRIM22	0.67931	1.51e-07	61.181	2.47e-08	4
TRIM52	0.67635	1.78e-07	62.282	1.61e-08	4
TRIP10	0.59086	4.82e-06	50.144	1.71e-06	2
TROVE2	0.58761	6.16e-06	62.008	1.78e-08	2
TRPC3	-0.59673	3.9e-06	-53.739	4.38e-07	-2
TSC22D4	0.761	4.25e-09	73.236	2.2e-10	3
TSFM	-0.49812	0.00012544	-43.097	2.36e-05	-2
TSPO	0.82863	1.78e-10	76.314	6.34e-11	3
TSPYL2	0.75533	7.72e-09	69.502	9.49e-10	2
TST	0.81113	3.89e-10	72.921	2.48e-10	2
TTC9	-0.84119	1.04e-10	-78.897	2.27e-11	-2
TUBA1A	-0.57274	9.16e-06	-49.135	2.53e-06	-2
TUBA4A	-0.57383	8.66e-06	-46.415	7.09e-06	-3
TUBB2A	-0.69352	8.09e-08	-63.825	8.8e-09	-3
TUBB3	-0.58357	5.77e-06	-43.395	2.12e-05	-2
TUBG1	-0.57678	7.7e-06	-44.219	1.58e-05	-2
TUBGCP4	-0.87918	1.34e-11	-81.196	9.05e-12	-3
TULP3	0.5655	1.31e-05	51.452	1.05e-06	2
TUSC2	-0.85659	5.73e-11	-78.929	2.25e-11	-2
TUSC3	-0.66365	3.22e-07	-69.103	1.11e-09	-2
TXN	-0.59927	3.62e-06	-50.504	1.5e-06	-2
TXNIP	0.75712	5.86e-09	78.671	2.48e-11	3
TXNL4A	-0.73473	1.61e-08	-70.975	5.28e-10	-3
TYMS	0.72599	1.97e-08	62.377	1.55e-08	2
UBE2D1	-0.62998	1.01e-06	-50.394	1.56e-06	-2
UBE2D2	-0.76195	3.98e-09	-70.141	7.37e-10	-3
UBE2E3	-0.80625	5.6e-10	-74.072	1.56e-10	-2
UBE2G1	-0.65183	4.21e-07	-54.887	2.83e-07	-3
UBE2K	-0.68499	1.14e-07	-58.611	6.7e-08	-2
UBE2N	-0.47724	0.00023928	-40.353	6.44e-05	-2
UBR5	0.7062	6.16e-08	70.908	5.42e-10	2
ULK2	-0.63763	1.38e-06	-74.283	1.43e-10	-2
UNG	0.76307	5.79e-09	82.834	4.65e-12	4
UPP1	0.86663	3.77e-11	83.944	3.03e-12	2
UQCRFS1	-0.7549	5.37e-09	-68.741	1.28e-09	-2
UROS	-0.64268	6.24e-07	-57.532	1.03e-07	-3
USP10	-0.51766	6.72e-05	-43.066	2.39e-05	-2
USP12	-0.89325	1.48e-11	-102.65	0	-3
USP14	-0.51381	7.7e-05	-45.642	9.4e-06	-2
UST	-1.2018	0	-124.66	0	-3
VAMP1	0.70048	6.25e-08	59.982	3.97e-08	2
VAMP3	0.67223	2.2e-07	68.846	1.24e-09	3
VCAN	0.98227	7.48e-14	99.445	7.69e-15	5
VDAC1	-0.49891	0.00014578	-64.986	5.57e-09	-2
VEZF1	0.60456	2.76e-06	50.229	1.66e-06	2
VGF	-0.5371	3.21e-05	-41.847	3.76e-05	-2
VHL	-0.48814	0.00016182	-37.669	0.00016563	-2
VIM	0.86246	3.13e-11	80.913	1e-11	5
VIP	-1.3007	0	-140.99	0	-3
VLDLR	-0.85736	6.41e-11	-89.013	4.04e-13	-3
VSIG4	0.52593	5.48e-05	51.853	9.01e-07	3
VTI1B	-0.57976	7.49e-06	-53.463	4.87e-07	-2
VWF	1.0051	1.65e-14	101.52	0	4
WASF2	0.50216	0.00014688	61.892	1.86e-08	3
WDR77	-0.50883	9.08e-05	-47.963	3.91e-06	-2
WFS1	0.95565	2.76e-13	93.922	5.38e-14	4
WNT7A	-0.78926	1.06e-09	-65.44	4.69e-09	-2
WSB1	0.53037	4.16e-05	43.813	1.83e-05	2
WSB2	-0.79294	1.09e-09	-76.452	5.99e-11	-3
WWTR1	0.75087	8.84e-09	80.256	1.31e-11	3
XPC	0.596	4.25e-06	56.104	1.8e-07	2
XPO7	-0.65472	5.34e-07	-67.61	2e-09	-2
XYLT1	-0.72648	2.04e-08	-62.855	1.29e-08	-2
YAF2	-0.60594	2.58e-06	-50.048	1.77e-06	-2
YAP1	0.51925	7.08e-05	56.944	1.3e-07	2
YES1	0.48986	0.0001626	43.931	1.75e-05	2
YTHDC1	0.78209	1.5e-09	65.335	4.87e-09	2
YTHDF3	-0.56326	1.63e-05	-55.629	2.14e-07	-2
YWHAZ	-0.77106	3.33e-09	-83.42	3.74e-12	-3
ZBTB16	0.82292	2.56e-10	83.02	4.35e-12	4
ZBTB20	0.76268	3.88e-09	71.543	4.27e-10	2
ZC3HAV1	0.61675	1.89e-06	54.844	2.87e-07	3
ZCCHC24	0.8003	8.41e-10	86.621	1.07e-12	4
ZFP36L1	0.67106	2.24e-07	64.673	6.28e-09	3
ZFYVE26	0.71106	3.44e-08	60.352	3.44e-08	2
ZHX3	0.7523	5.74e-09	67.063	2.52e-09	3
ZNF146	0.45119	0.0005436	43.562	1.99e-05	2
ZNF189	0.7836	1.28e-09	64.572	6.54e-09	2
ZNF217	0.59422	4.91e-06	63.018	1.2e-08	2
ZNF292	0.61956	1.46e-06	48.059	3.77e-06	2
ZNF330	0.51926	6.26e-05	41.739	3.92e-05	2
ZNF423	0.52131	6.41e-05	56.501	1.55e-07	3
ZNF652	0.70379	4.65e-08	59.506	4.74e-08	2
ZNF711	-0.70855	4.56e-08	-70.658	5.97e-10	-2
ZNF804A	-0.7352	1.31e-08	-63.229	1.11e-08	-3
ZNF91	-0.53597	3.89e-05	-53.537	4.73e-07	-2
ZNHIT3	-0.56101	1.43e-05	-47.203	5.25e-06	-2
ZRSR2	0.53917	3.27e-05	46.247	7.55e-06	2
ZYX	0.53942	3.27e-05	45.791	8.91e-06	2
