# Supplementary material for: Re-exploring the core genes and modules in the human frontal cortex during chronological aging: insights from network-based analysis of transcriptomic studies
Source: Aging (Albany NY). 2018 Oct 20;10(10):2816–31. doi: 10.18632/aging.101589 (PMC6224233; doi:10.18632/aging.101589)
Supplement: Table S3 [file aging-10-101589-s003.xlsx]

## Sheet: 工作表1
Table S3A. KEGG pathway analysis among significant down-regulation genes
Category	Term	Count	%	PValue	Genes	List Total	Pop Hits	Pop Total	Fold Enrichment	Bonferroni	Benjamini	FDR
KEGG_PATHWAY	hsa04723:Retrograde endocannabinoid signaling	24	0.0225598	3.36e-10	GABRD, ADCY1, GABRB3, ADCY7, GNAI1, GABRA5, PRKCG, CACNA1S, GRM1, RIMS1, KCNJ3, PRKCB, GRM5, MAPK1, KCNJ6, PLCB4, KCNJ9, GRIA1, CNR1, GNB5, MGLL, MAPK8, GNG4, PLCB1	339	101	6910	4.8436	8.34e-08	8.34e-08	4.36e-07
KEGG_PATHWAY	hsa04540:Gap junction	20	0.0187998	3.08e-08	HRAS, DRD1, ADCY1, ADCY7, GNAI1, TUBB2A, PRKCG, PRKG2, GRM1, PRKCB, GRM5, MAPK1, PLCB4, GUCY1A2, PDGFRA, TUBA4A, PLCB1, TUBA1A, TUBB3, HTR2A	339	88	6910	4.63261	7.63e-06	3.81e-06	3.99e-05
KEGG_PATHWAY	hsa04724:Glutamatergic synapse	22	0.0206798	1.08e-07	DLGAP1, ADCY1, ADCY7, GRIK1, GNAI1, GRIK3, PRKCG, HOMER1, GRM1, KCNJ3, SHANK2, PRKCB, GRM5, MAPK1, GRM2, PLCB4, GRIN2B, GRIA1, SLC1A6, GNB5, GNG4, PLCB1	339	114	6910	3.93365	2.68e-05	8.92e-06	0.00014
KEGG_PATHWAY	hsa04713:Circadian entrainment	19	0.0178598	5.77e-07	ADCY1, ADCY7, GNAI1, PRKCG, PRKG2, KCNJ3, PRKCB, MAPK1, KCNJ6, PLCB4, GRIN2B, KCNJ9, GRIA1, CACNA1G, GUCY1A2, CACNA1H, GNB5, GNG4, PLCB1	339	95	6910	4.0767	0.000143	3.58e-05	0.000749
KEGG_PATHWAY	hsa04921:Oxytocin signaling pathway	25	0.0234998	5.78e-07	MEF2C, HRAS, ADCY1, ADCY7, GNAI1, CACNB1, CACNB2, CACNB3, CACNB4, KCNJ3, CAMKK2, PLCB4, GUCY1A2, PLCB1, CACNA2D1, CACNG3, PRKCG, CACNA1S, PRKCB, MAPK1, PPP1CA, KCNJ6, CAMK4, KCNJ9, CAMK1	339	158	6910	3.22523	0.000143	2.87e-05	0.000751
KEGG_PATHWAY	hsa04730:Long-term depression	15	0.0140999	7.67e-07	CRHR1, MAPK1, HRAS, PLCB4, GNAI1, GRIA1, PPP2CA, CRH, GUCY1A2, IGF1, PRKCG, PRKG2, PLCB1, GRM1, PRKCB	339	60	6910	5.09587	0.00019	3.17e-05	0.000995
KEGG_PATHWAY	hsa05032:Morphine addiction	18	0.0169198	1.47e-06	GABRD, DRD1, ADCY1, ADCY7, GABRB3, GNAI1, GABRA5, PRKCG, GABBR2, KCNJ3, PRKCB, KCNJ6, PDE2A, KCNJ9, GNB5, PDE8B, GRK5, GNG4	339	91	6910	4.0319	0.000365	5.21e-05	0.00190806
KEGG_PATHWAY	hsa04020:Calcium signaling pathway	26	0.0244398	1.68e-06	DRD1, ADCY1, ADCY7, ITPKA, EDNRA, ATP2B2, PLCB4, PLCB1, SLC8A2, PTGER3, CCKBR, SLC25A4, PRKCG, GRM1, CACNA1S, PRKCB, VDAC1, P2RX5, GRM5, GNAL, CAMK4, PDGFRA, CACNA1G, CACNA1H, ADRA1D, HTR2A	339	179	6910	2.96073	0.000415	5.19e-05	0.00217338
KEGG_PATHWAY	hsa04010:MAPK signaling pathway	32	0.0300797	2.02e-06	MEF2C, HRAS, FGF9, CACNB1, CACNB2, FGF13, CACNB3, FGF12, CACNB4, CDC42, BDNF, RAC3, RASGRP1, PAK1, MAP2K6, CACNA2D1, PTPRR, CACNG3, PRKCG, CACNA1S, PRKCB, MAPK1, DUSP3, RPS6KA3, RASGRF1, CACNA1G, PDGFRA, CACNA1H, MAPK8, MAPK8IP1, DUSP7, DUSP6	339	255	6910	2.55793	0.000502	5.57e-05	0.00262464
KEGG_PATHWAY	hsa04720:Long-term potentiation	15	0.0140999	2.62e-06	ADCY1, HRAS, PRKCG, GRM1, PRKCB, GRM5, MAPK1, RPS6KA3, PPP1CA, PLCB4, GRIN2B, CAMK4, GRIA1, PPP1R1A, PLCB1	339	66	6910	4.63261	0.000649	6.49e-05	0.00339587
KEGG_PATHWAY	hsa04728:Dopaminergic synapse	21	0.0197398	3.31e-06	DRD1, GNAI1, PPP2R5C, PRKCG, ARNTL, KCNJ3, PRKCB, GNAL, PPP1CA, PLCB4, KCNJ6, GRIN2B, KCNJ9, GRIA1, PPP2CA, GNB5, MAPK8, PPP2R5E, GNG4, PLCB1, CLOCK	339	128	6910	3.34416	0.00082	7.46e-05	0.00429178
KEGG_PATHWAY	hsa05012:Parkinson's disease	21	0.0197398	1.65e-05	NDUFB3, NDUFB5, DRD1, NDUFB6, SLC25A4, NDUFA9, GNAI1, UBE2G1, COX8A, CYCS, ATP5F1, UQCRFS1, COX5A, ATP5G3, VDAC1, GNAL, SDHB, NDUFS4, HTRA2, ATP5A1, ATP5J	339	142	6910	3.01446	0.00409052	0.000342	0.0214418
KEGG_PATHWAY	hsa04261:Adrenergic signaling in cardiomyocytes	21	0.0197398	2.51e-05	CACNA2D1, ADCY1, ADCY7, GNAI1, PPP2R5C, CACNB1, CACNB2, CACNG3, CACNB3, CACNB4, CACNA1S, TPM3, MAPK1, ATP2B2, PPP1CA, PLCB4, PPP2CA, PPP1R1A, PPP2R5E, PLCB1, ADRA1D	339	146	6910	2.93187	0.00619529	0.000478	0.0325072
KEGG_PATHWAY	hsa04727:GABAergic synapse	15	0.0140999	5.51e-05	GABRD, ADCY1, ADCY7, GABRB3, GNAI1, GABRA5, PRKCG, GABBR2, CACNA1S, PRKCB, GAD2, KCNJ6, GNB5, GNG4, GAD1	339	85	6910	3.59708	0.0135765	0.000976	0.0714886
KEGG_PATHWAY	hsa05010:Alzheimer's disease	22	0.0206798	6.32e-05	NDUFB3, CDK5R1, NDUFB5, NDUFB6, NDUFA9, COX8A, CYCS, ATP5F1, BAD, UQCRFS1, COX5A, CACNA1S, ATP5G3, CDK5, SDHB, MAPK1, NDUFS4, PLCB4, GRIN2B, ATP5A1, PLCB1, ATP5J	339	168	6910	2.66927	0.0155569	0.00104473	0.0819944
KEGG_PATHWAY	hsa04015:Rap1 signaling pathway	25	0.0234998	8.26e-05	PRKCZ, ADCY1, HRAS, ADCY7, MAGI1, GNAI1, FGF9, PRKCI, KITLG, IGF1, PRKCG, FGF13, FGF12, KIT, RGS14, PRKCB, MAPK1, CDC42, PLCB4, GRIN2B, RAC3, CNR1, PDGFRA, PLCB1, MAP2K6	339	210	6910	2.4266	0.020266	0.00127882	0.107057
KEGG_PATHWAY	hsa04725:Cholinergic synapse	17	0.0159798	8.78e-05	ADCY1, HRAS, ADCY7, GNAI1, PRKCG, CACNA1S, KCNJ3, PRKCB, MAPK1, KCNJ6, PLCB4, CAMK4, CHRNA4, GNB5, GNG4, PLCB1, KCNQ2	339	111	6910	3.12179	0.0215365	0.00127987	0.113838
KEGG_PATHWAY	hsa04360:Axon guidance	18	0.0169198	0.000136	HRAS, GNAI1, NTNG1, EPHB3, CDK5, CXCL12, SLIT1, SLIT2, EPHB2, EPHA3, EPHA5, CDC42, EPHA4, MAPK1, RND1, RAC3, SEMA4F, PAK1	339	127	6910	2.889	0.0331896	0.00187341	0.176428
KEGG_PATHWAY	hsa04022:cGMP-PKG signaling pathway	21	0.0197398	0.000158	MEF2C, ADCY1, SLC8A2, SLC25A4, ADCY7, GNAI1, BAD, PRKG2, CACNA1S, VDAC1, EDNRA, MEF2D, ATP2B2, MAPK1, PPP1CA, PLCB4, PDE2A, ADRA2A, GUCY1A2, PLCB1, ADRA1D	339	166	6910	2.57863	0.0384028	0.00205891	0.204661
KEGG_PATHWAY	hsa04726:Serotonergic synapse	16	0.0150399	0.000302	HRAS, KCND2, GABRB3, GNAI1, PRKCG, CACNA1S, KCNJ3, PRKCB, MAPK1, KCNJ6, PLCB4, KCNJ9, GNB5, GNG4, PLCB1, HTR2A	339	111	6910	2.93816	0.0720847	0.00373375	0.390642
KEGG_PATHWAY	hsa05016:Huntington's disease	22	0.0206798	0.000421	NDUFB3, NDUFB5, NDUFB6, SLC25A4, NDUFA9, COX8A, CYCS, ATP5F1, UQCRFS1, COX5A, ATP5G3, VDAC1, GRM5, SDHB, BDNF, NDUFS4, PLCB4, GRIN2B, ATP5A1, PLCB1, TBPL1, ATP5J	339	192	6910	2.33561	0.099101	0.00495729	0.5445
KEGG_PATHWAY	hsa04925:Aldosterone synthesis and secretion	13	0.0122199	0.000516	ADCY1, PLCB4, PDE2A, CAMK4, ADCY7, CACNA1G, CACNA1H, CAMK1, PRKCG, PLCB1, CACNA1S, KCNK3, PRKCB	339	81	6910	3.27142	0.12022	0.00580506	0.667851
KEGG_PATHWAY	hsa00190:Oxidative phosphorylation	16	0.0150399	0.0020294	NDUFB3, NDUFB5, NDUFB6, NDUFA9, COX8A, ATP5F1, ATP6V1G2, COX5A, UQCRFS1, ATP5G3, ATP6V0B, SDHB, NDUFS4, ATP5A1, ATP6V0D1, ATP5J	339	133	6910	2.45215	0.395771	0.0216663	2.6013
KEGG_PATHWAY	hsa04911:Insulin secretion	12	0.0112799	0.00269323	RAB3A, ADCY1, STX1A, PLCB4, ADCY7, KCNN1, PRKCG, PLCB1, CACNA1S, PCLO, PRKCB, ADCYAP1	339	85	6910	2.87767	0.487688	0.0274828	3.43854
KEGG_PATHWAY	hsa05200:Pathways in cancer	33	0.0310197	0.00282967	HRAS, ADCY1, ADCY7, FGF9, GNAI1, KITLG, FGF13, KIT, FGF12, CXCL12, TPM3, EDNRA, CDC42, PLCB4, RAC3, RASGRP1, RARB, PLCB1, GNG4, LAMB1, PTGER3, VHL, CYCS, SMAD3, IGF1, PRKCG, BAD, PRKCB, MAPK1, PDGFRA, GNB5, MAPK8, WNT7A	339	393	6910	1.71159	0.504779	0.0277187	3.6098
KEGG_PATHWAY	hsa04915:Estrogen signaling pathway	13	0.0122199	0.00306547	MAPK1, ADCY1, HRAS, KCNJ6, PLCB4, ADCY7, KCNJ9, GNAI1, GABBR2, PLCB1, GRM1, PRKCD, KCNJ3	339	99	6910	2.67662	0.53299	0.0288601	3.90512
KEGG_PATHWAY	hsa04260:Cardiac muscle contraction	11	0.0103399	0.00333261	CACNA2D1, COX8A, CACNB1, CACNB2, CACNG3, CACNB3, CACNB4, UQCRFS1, COX5A, CACNA1S, TPM3	339	75	6910	2.98958	0.56302	0.0301965	4.23868
KEGG_PATHWAY	hsa04014:Ras signaling pathway	22	0.0206798	0.00335078	HRAS, FGF9, IGF1, KITLG, PRKCG, FGF13, BAD, FGF12, KIT, PRKCB, CDC42, MAPK1, GRIN2B, RASGRF1, RAC3, RASGRP1, PDGFRA, GNB5, MAPK8, PAK1, GNG4, PLA2G5	339	226	6910	1.98423	0.564991	0.0292906	4.26132
KEGG_PATHWAY	hsa04080:Neuroactive ligand-receptor interaction	25	0.0234998	0.00438432	DRD1, GRIK1, GABRB3, GRIK3, GLRA2, GABBR2, EDNRA, HCRTR1, GRIN2B, CNR1, ADRA2A, CHRNA4, GABRD, PTGER3, CCKBR, GABRA5, GRM1, NPY5R, P2RX5, GRM5, CRHR1, GRM2, GRIA1, ADRA1D, HTR2A	339	277	6910	1.83966	0.663684	0.0368788	5.54151
KEGG_PATHWAY	hsa04912:GnRH signaling pathway	12	0.0112799	0.00460316	CDC42, MAPK1, ADCY1, HRAS, PLCB4, ADCY7, MAPK8, PLCB1, CACNA1S, PRKCD, MAP2K6, PRKCB	339	91	6910	2.68793	0.681528	0.0374225	5.81053
KEGG_PATHWAY	hsa04270:Vascular smooth muscle contraction	14	0.0131599	0.00520663	ADCY1, ADCY7, PRKCG, CACNA1S, PRKCD, PRKCB, EDNRA, MAPK1, PPP1CA, PLCB4, GUCY1A2, PLCB1, PLA2G5, ADRA1D	339	119	6910	2.39806	0.725997	0.0409018	6.54873
KEGG_PATHWAY	hsa04530:Tight junction	15	0.0140999	0.00689042	PRKCZ, RAB3B, HRAS, MAGI1, GNAI1, PRKCI, CASK, ACTN2, MYL12B, PRKCG, PRKCD, PRKCB, CDC42, CSNK2A1, PPP2CA	339	137	6910	2.23177	0.819989	0.0521752	8.58033
KEGG_PATHWAY	hsa05414:Dilated cardiomyopathy	11	0.0103399	0.00753238	ADCY1, CACNA2D1, ADCY7, CACNB1, CACNB2, IGF1, CACNG3, CACNB3, CACNB4, CACNA1S, TPM3	339	84	6910	2.66927	0.846661	0.0552371	9.3441
KEGG_PATHWAY	hsa04024:cAMP signaling pathway	19	0.0178598	0.00799886	DRD1, ADCY1, PTGER3, ADCY7, GNAI1, GABBR2, BAD, CACNA1S, EDNRA, MAPK1, ATP2B2, PPP1CA, BDNF, GRIN2B, CAMK4, RAC3, GRIA1, MAPK8, PAK1	339	198	6910	1.95599	0.863536	0.0568964	9.89538
KEGG_PATHWAY	hsa04750:Inflammatory mediator regulation of TRP channels	12	0.0112799	0.00804711	ADCY1, PPP1CA, PLCB4, ADCY7, IGF1, MAPK8, PRKCG, PLCB1, PRKCD, MAP2K6, PRKCB, HTR2A	339	98	6910	2.49594	0.865172	0.0556422	9.95224
KEGG_PATHWAY	hsa04916:Melanogenesis	12	0.0112799	0.00932923	MAPK1, ADCY1, HRAS, PLCB4, ADCY7, GNAI1, KITLG, PRKCG, KIT, PLCB1, WNT7A, PRKCB	339	100	6910	2.44602	0.902169	0.0625292	11.4507
KEGG_PATHWAY	hsa05130:Pathogenic Escherichia coli infection	8	0.00751993	0.0113906	CDC42, ARPC3, TUBB2A, ARPC2, TUBA4A, ARPC5, TUBA1A, TUBB3	339	51	6910	3.19741	0.941638	0.0739121	13.8117
KEGG_PATHWAY	hsa04510:Focal adhesion	19	0.0178598	0.0118137	HRAS, IGF1, ACTN2, MYL12B, PRKCG, BAD, PRKCB, CDC42, MAPK1, PPP1CA, RASGRF1, RAC3, CCND2, PDGFRA, RELN, MAPK8, TNN, PAK1, LAMB1	339	206	6910	1.88003	0.947516	0.0746275	14.2891
KEGG_PATHWAY	hsa04071:Sphingolipid signaling pathway	13	0.0122199	0.0140142	MAPK1, PRKCZ, HRAS, PLCB4, RAC3, GNAI1, PPP2CA, PPP2R5C, PRKCG, PPP2R5E, MAPK8, PLCB1, PRKCB	339	120	6910	2.20821	0.969806	0.0858372	16.7327
KEGG_PATHWAY	hsa00020:Citrate cycle (TCA cycle)	6	0.00563995	0.0141161	SDHB, IDH3B, DLAT, SUCLA2, MDH2, PDHB	339	30	6910	4.0767	0.97057	0.0843707	16.8443
KEGG_PATHWAY	hsa01100:Metabolic pathways	76	0.0714393	0.0195744	TM7SF2, SEPHS2, TUSC3, HMGCR, PIP5K1B, COX5A, UQCRFS1, ITPKA, PDHB, NDUFS4, PTGIS, ACOT8, PLCB4, PTGES, XYLT1, B3GALNT1, MGLL, ATP6V0D1, PLCB1, SUCLA2, AGPAT1, ATP5J, PLD3, HYAL3, PIK3C2G, FECH, CYCS, CYP26A1, DGUOK, MAN1A1, COQ7, GLCE, PMM1, COQ2, PANK3, RFK, SQLE, INPP4A, MDH2, PRPS2, PLA2G5, NDUFB3, NDUFB5, EXTL3, GALNT1, NDUFB6, ASS1, HMGCS1, DCK, UROS, ASNS, ATP6V1G2, EXTL1, ACAT2, ATP5G3, A…	339	1228	6910	1.26152	0.992573	0.112703	22.6236
KEGG_PATHWAY	hsa04666:Fc gamma R-mediated phagocytosis	10	0.00939991	0.0209192	CDC42, MAPK1, ARPC3, ARPC2, PIP5K1B, PRKCG, PAK1, ARPC5, PRKCD, PRKCB	339	84	6910	2.4266	0.994716	0.117356	23.9894
KEGG_PATHWAY	hsa04970:Salivary secretion	10	0.00939991	0.0240135	ATP2B2, ADCY1, PLCB4, ADCY7, GUCY1A2, PRKCG, PRKG2, PLCB1, ADRA1D, PRKCB	339	86	6910	2.37017	0.99759	0.130804	27.0478
KEGG_PATHWAY	hsa04611:Platelet activation	13	0.0122199	0.0248576	MAPK1, PRKCZ, ADCY1, PPP1CA, PLCB4, ADCY7, GNAI1, RASGRP1, GUCY1A2, PRKCI, MYL12B, PRKG2, PLCB1	339	130	6910	2.03835	0.998055	0.132272	27.8623
KEGG_PATHWAY	hsa05231:Choline metabolism in cancer	11	0.0103399	0.0253257	MAPK1, HRAS, DGKB, DGKE, RAC3, PDGFRA, PIP5K1B, LYPLA1, MAPK8, PRKCG, PRKCB	339	101	6910	2.21998	0.998274	0.131832	28.3102
KEGG_PATHWAY	hsa04971:Gastric acid secretion	9	0.00845992	0.0253889	ADCY1, PLCB4, ADCY7, CCKBR, GNAI1, PRKCG, PLCB1, KCNK2, PRKCB	339	73	6910	2.51303	0.998301	0.129465	28.3705
KEGG_PATHWAY	hsa00534:Glycosaminoglycan biosynthesis - heparan sulfate / heparin	5	0.00469995	0.027511	EXTL3, XYLT1, HS3ST1, EXTL1, GLCE	339	24	6910	4.24656	0.999011	0.136878	30.3679
KEGG_PATHWAY	hsa05030:Cocaine addiction	7	0.00657994	0.0310919	CDK5R1, DRD1, BDNF, GRM2, GRIN2B, GNAI1, CDK5	339	49	6910	2.91193	0.999604	0.150572	33.6222
KEGG_PATHWAY	hsa04924:Renin secretion	8	0.00751993	0.0357397	EDNRA, PLCB4, GNAI1, GUCY1A2, PRKG2, PLCB1, CACNA1S, ADCYAP1	339	64	6910	2.54794	0.99988	0.168229	37.6368
KEGG_PATHWAY	hsa05410:Hypertrophic cardiomyopathy (HCM)	9	0.00845992	0.0359573	CACNA2D1, CACNB1, CACNB2, IGF1, CACNG3, CACNB3, CACNB4, CACNA1S, TPM3	339	78	6910	2.35194	0.999886	0.166093	37.8192
KEGG_PATHWAY	hsa04062:Chemokine signaling pathway	16	0.0150399	0.0384427	PRKCZ, ADCY1, HRAS, ADCY7, GNAI1, CX3CL1, PRKCD, CXCL12, CDC42, MAPK1, PLCB4, GNB5, PAK1, GRK5, GNG4, PLCB1	339	186	6910	1.75342	0.99994	0.173558	39.8673
KEGG_PATHWAY	hsa00650:Butanoate metabolism	5	0.00469995	0.0405407	GAD2, OXCT1, HMGCS1, ACAT2, GAD1	339	27	6910	3.77472	0.999965	0.179118	41.5475
KEGG_PATHWAY	hsa05031:Amphetamine addiction	8	0.00751993	0.0412803	DRD1, STX1A, PPP1CA, GRIN2B, CAMK4, GRIA1, PRKCG, PRKCB	339	66	6910	2.47072	0.999971	0.179024	42.1295
KEGG_PATHWAY	hsa05033:Nicotine addiction	6	0.00563995	0.0439142	GABRD, GRIN2B, GABRB3, GRIA1, GABRA5, CHRNA4	339	40	6910	3.05752	0.999985	0.186364	44.1586
KEGG_PATHWAY	hsa04070:Phosphatidylinositol signaling system	10	0.00939991	0.0496175	DGKB, PIK3C2G, PLCB4, DGKE, PIP5K1B, PRKCG, INPP4A, PLCB1, ITPKA, PRKCB	339	98	6910	2.07995	0.999997	0.205046	48.3295
KEGG_PATHWAY	hsa04810:Regulation of actin cytoskeleton	17	0.0159798	0.053275	HRAS, FGF9, PIP5K1B, ABI2, ACTN2, MYL12B, FGF13, FGF12, ARPC5, CDC42, MAPK1, PPP1CA, ARPC3, RAC3, ARPC2, PDGFRA, PAK1	339	211	6910	1.64227	0.999999	0.215296	50.8509
KEGG_PATHWAY	hsa04520:Adherens junction	8	0.00751993	0.0574783	CDC42, MAPK1, CSNK2A1, RAC3, LMO7, SMAD3, ACTN2, SSX2IP	339	71	6910	2.29673	1	0.227062	53.6081
KEGG_PATHWAY	hsa05218:Melanoma	8	0.00751993	0.0574783	MAPK1, HRAS, FGF9, PDGFRA, IGF1, FGF13, FGF12, BAD	339	71	6910	2.29673	1	0.227062	53.6081
KEGG_PATHWAY	hsa05412:Arrhythmogenic right ventricular cardiomyopathy (ARVC)	8	0.00751993	0.0574783	CACNA2D1, CACNB1, CACNB2, ACTN2, CACNG3, CACNB3, CACNB4, CACNA1S	339	71	6910	2.29673	1	0.227062	53.6081
KEGG_PATHWAY	hsa04150:mTOR signaling pathway	7	0.00657994	0.0627087	MAPK1, RPS6KA3, ULK2, IGF1, PRKCG, EIF4E2, PRKCB	339	58	6910	2.46008	1	0.241877	56.8396
KEGG_PATHWAY	hsa05146:Amoebiasis	10	0.00939991	0.0741592	GNAL, ADCY1, PLCB4, ARG2, SERPINB2, ACTN2, PRKCG, PLCB1, LAMB1, PRKCB	339	106	6910	1.92297	1	0.276666	63.202
KEGG_PATHWAY	hsa04370:VEGF signaling pathway	7	0.00657994	0.0763383	CDC42, MAPK1, HRAS, RAC3, PRKCG, BAD, PRKCB	339	61	6910	2.33909	1	0.279799	64.31
KEGG_PATHWAY	hsa00072:Synthesis and degradation of ketone bodies	3	0.00281997	0.082799	OXCT1, HMGCS1, ACAT2	339	10	6910	6.11504	1	0.296285	67.4168
KEGG_PATHWAY	hsa04930:Type II diabetes mellitus	6	0.00563995	0.0836886	MAPK1, PRKCZ, SOCS2, CACNA1G, MAPK8, PRKCD	339	48	6910	2.54794	1	0.295027	67.8244
KEGG_PATHWAY	hsa04972:Pancreatic secretion	9	0.00845992	0.0840661	ATP2B2, ADCY1, PLCB4, ADCY7, PRKCG, PLCB1, RAB27B, PLA2G5, PRKCB	339	93	6910	1.97259	1	0.292253	67.996
KEGG_PATHWAY	hsa04114:Oocyte meiosis	10	0.00939991	0.0850027	MAPK1, ADCY1, PPP1CA, RPS6KA3, YWHAZ, ADCY7, PPP2CA, PPP2R5C, IGF1, PPP2R5E	339	109	6910	1.87004	1	0.291236	68.418
KEGG_PATHWAY	hsa00900:Terpenoid backbone biosynthesis	4	0.00375996	0.0898433	HMGCR, FDPS, HMGCS1, ACAT2	339	22	6910	3.70609	1	0.301748	70.5184
KEGG_PATHWAY	hsa05034:Alcoholism	14	0.0131599	0.0925897	DRD1, HRAS, GNAI1, CAMKK2, MAPK1, PPP1CA, BDNF, GRIN2B, HIST1H2BK, CAMK4, CRH, GNB5, HDAC9, GNG4	339	177	6910	1.61225	1	0.305864	71.652
Table S3B. KEGG pathway analysis among significant up-regulation genes
Category	Term	Count	%	PValue	Genes	List Total	Pop Hits	Pop Total	Fold Enrichment	Bonferroni	Benjamini	FDR
KEGG_PATHWAY	hsa04810:Regulation of actin cytoskeleton	30	0.0299285	2.50412e-08	GNA13, FGFR2, FGFR1, FGFR3, WASF2, GNA12, ITGB4, RDX, GNG12, ITGB1, IQGAP1, PTK2, DOCK1, EZR, PAK2, GSN, ITGB8, ITGAV, RRAS, FGF1, FGF2, LIMK2, ACTN4, ARHGEF6, ITGA8, MAPK3, PDGFRB, PIP4K2A, MYLK, CD14	301	211	6910	3.264	6.16013e-06	6.16013e-06	3.24484e-05
KEGG_PATHWAY	hsa04151:PI3K-Akt signaling pathway	35	0.0349165	5.02475e-06	FGFR2, FGFR1, FGFR3, EFNA1, OSMR, TLR2, ITGB4, NFKB1, GNG12, LPAR1, ITGB1, PTK2, ITGB8, BCL2, ITGAV, FGF1, ANGPT2, INSR, GNG5, FGF2, SPP1, SGK1, RBL2, RXRA, PKN1, RPS6, BRCA1, DDIT4, COL4A5, VWF, CDKN1A, CCND3, ITGA8, MAPK3, PDGFRB	301	345	6910	2.32895	0.00123533	0.000617855	0.00651087
KEGG_PATHWAY	hsa05205:Proteoglycans in cancer	25	0.0249404	5.04282e-06	FGFR1, ERBB3, HCLS1, TLR2, RDX, RPS6, SDC4, TIMP3, FLNB, ITGB1, STAT3, IQGAP1, FZD7, SDC2, PTK2, PLCE1, CDKN1A, EZR, HIF1A, CD44, ITGAV, GAB1, MAPK3, RRAS, FGF2	301	200	6910	2.8696	0.00123977	0.000413427	0.00653429
KEGG_PATHWAY	hsa04520:Adherens junction	12	0.0119714	0.000214057	FGFR1, TJP1, ACTN4, SORBS1, TGFBR1, MAPK3, WASF2, YES1, CTNNA1, INSR, TCF7L2, IQGAP1	301	71	6910	3.88002	0.051301	0.0130796	0.277021
KEGG_PATHWAY	hsa04014:Ras signaling pathway	23	0.0229452	0.000301208	FGFR2, PLD2, FGFR1, PLD1, PLA2G16, FGFR3, EFNA1, NFKB1, GNG12, FOXO4, RALGDS, PLCE1, GAB2, PAK2, GAB1, MAPK3, RRAS, PDGFRB, FGF1, FGF2, GNG5, INSR, ANGPT2	301	226	6910	2.33631	0.0714289	0.0147124	0.389603
KEGG_PATHWAY	hsa05200:Pathways in cancer	33	0.0329213	0.000383695	GNA13, FGFR2, FGFR1, FGFR3, GNA12, TGFB3, NFKBIA, NFKB1, GNG12, ZBTB16, LPAR1, TCF7L2, ITGB1, PTK2, BCL2, ITGAV, FGF1, GNG5, FGF2, BMP4, TGFBR1, RXRA, CTNNA1, FZD7, RALGDS, STAT3, COL4A5, JUP, CDKN1A, HIF1A, HDAC1, MAPK3, PDGFRB	301	393	6910	1.92767	0.0900878	0.0156114	0.496053
KEGG_PATHWAY	hsa04010:MAPK signaling pathway	24	0.0239428	0.000657362	FGFR2, FGFR1, FGFR3, TGFBR1, GNA12, TGFB3, NFKB1, GNG12, FLNB, RPS6KA5, TNFRSF1A, MAP4K4, MAP3K5, HSPA2, PAK2, RPS6KA2, MAPK3, HSPB1, RRAS, PDGFRB, FGF1, FGF2, NFATC3, CD14	301	255	6910	2.16064	0.149358	0.0228442	0.848469
KEGG_PATHWAY	hsa05140:Leishmaniasis	11	0.0109738	0.000898324	MAPK3, TGFB3, TLR2, NFKBIA, NFKB1, HLA-DPA1, FCGR2A, HLA-DMB, HLA-DMA, ITGB1, IFNGR1	301	71	6910	3.55669	0.198353	0.0272575	1.15782
KEGG_PATHWAY	hsa04510:Focal adhesion	20	0.0199523	0.00147903	ACTN4, ITGB4, CAPN2, FLNB, ITGB1, COL4A5, VWF, PTK2, DOCK1, CCND3, PAK2, ITGB8, ITGAV, ITGA8, BCL2, MAPK3, PDGFRB, ZYX, MYLK, SPP1	301	206	6910	2.22882	0.305185	0.0396492	1.89966
KEGG_PATHWAY	hsa05145:Toxoplasmosis	14	0.0139666	0.00172256	TGFB3, TLR2, NFKBIA, NFKB1, HLA-DMB, HLA-DMA, ITGB1, STAT3, TNFRSF1A, HSPA2, BCL2, MAPK3, HLA-DPA1, IFNGR1	301	118	6910	2.72369	0.345652	0.0415248	2.20925
KEGG_PATHWAY	hsa04550:Signaling pathways regulating pluripotency of stem cells	15	0.0149642	0.00291492	BMP4, FGFR2, FGFR1, FGFR3, SMAD5, PAX6, LIFR, STAT3, FZD7, MAPK3, ID4, ID3, BMPR1B, FGF2, KAT6A	301	140	6910	2.45966	0.51233	0.063198	3.71201
KEGG_PATHWAY	hsa04066:HIF-1 signaling pathway	12	0.0119714	0.00331007	TF, CDKN1A, HIF1A, BCL2, MAPK3, NFKB1, RPS6, ANGPT2, INSR, STAT3, IFNGR1, TIMP1	301	98	6910	2.81104	0.557638	0.0657105	4.20531
KEGG_PATHWAY	hsa04514:Cell adhesion molecules (CAMs)	15	0.0149642	0.00332166	MAG, HLA-A, HLA-DMB, HLA-E, SDC4, HLA-DMA, ITGB1, SDC2, ITGB8, ITGAV, ITGA8, PECAM1, CD22, VCAN, HLA-DPA1	301	142	6910	2.42502	0.558902	0.0610196	4.21975
KEGG_PATHWAY	hsa04978:Mineral absorption	8	0.00798093	0.00337641	TF, MT2A, MT1E, HEPH, MT1H, MT1X, MT1G, MT1F	301	46	6910	3.99249	0.564823	0.0576973	4.28791
KEGG_PATHWAY	hsa05412:Arrhythmogenic right ventricular cardiomyopathy (ARVC)	10	0.00997616	0.00338212	JUP, ACTN4, ITGB8, ITGAV, ITGA8, ITGB4, GJA1, CTNNA1, ITGB1, TCF7L2	301	71	6910	3.23335	0.565436	0.0540454	4.29501
KEGG_PATHWAY	hsa05131:Shigellosis	9	0.00897854	0.00612252	DOCK1, CD44, HCLS1, MAPK3, WASF2, NFKBIA, NFKB1, ITGB1, RHOG	301	64	6910	3.2283	0.77926	0.0901022	7.64953
KEGG_PATHWAY	hsa05132:Salmonella infection	10	0.00997616	0.00949411	TJP1, PLEKHM2, MAPK3, WASF2, PKN1, NFKB1, FLNB, RHOG, CD14, IFNGR1	301	83	6910	2.76588	0.904316	0.128938	11.6278
KEGG_PATHWAY	hsa04512:ECM-receptor interaction	10	0.00997616	0.012749	VWF, CD44, ITGB8, ITGAV, ITGA8, ITGB4, SDC4, ITGB1, SPP1, COL4A5	301	87	6910	2.63871	0.957422	0.160843	15.3177
KEGG_PATHWAY	hsa00340:Histidine metabolism	5	0.00498808	0.0160429	ALDH7A1, ASPA, MAOB, ALDH2, ALDH9A1	301	23	6910	4.99061	0.981287	0.188927	18.9066
KEGG_PATHWAY	hsa05100:Bacterial invasion of epithelial cells	9	0.00897854	0.0192768	PTK2, DOCK1, HCLS1, GAB1, WASF2, CTNNA1, ITGB1, RHOG, DNM2	301	78	6910	2.64886	0.991674	0.212915	22.2932
KEGG_PATHWAY	hsa04015:Rap1 signaling pathway	17	0.0169595	0.0200145	FGFR2, FGFR1, FGFR3, EFNA1, LPAR1, ITGB1, RALGDS, PLCE1, MAPK3, RRAS, PDGFRB, RAPGEF3, FGF1, FGF2, INSR, ANGPT2, PRKD3	301	210	6910	1.85841	0.993081	0.210878	23.0472
KEGG_PATHWAY	hsa05321:Inflammatory bowel disease (IBD)	8	0.00798093	0.0202249	TGFB3, TLR2, NFKB1, HLA-DPA1, HLA-DMB, HLA-DMA, STAT3, IFNGR1	301	64	6910	2.8696	0.993437	0.204249	23.261
KEGG_PATHWAY	hsa05152:Tuberculosis	15	0.0149642	0.0214388	TNFRSF1A, LAMP2, BCL2, MAPK3, TLR2, TGFB3, FCER1G, NFKB1, HLA-DPA1, FCGR2A, HLA-DMB, HLA-DMA, CD14, CD74, IFNGR1	301	177	6910	1.94549	0.995162	0.206892	24.4839
KEGG_PATHWAY	hsa00310:Lysine degradation	7	0.00698331	0.0241977	ALDH7A1, PLOD2, PLOD3, ALDH2, OGDH, BBOX1, ALDH9A1	301	52	6910	3.09034	0.997584	0.222037	27.1967
KEGG_PATHWAY	hsa05150:Staphylococcus aureus infection	7	0.00698331	0.0285794	C5, CFH, HLA-DPA1, FCGR2A, CFI, HLA-DMB, HLA-DMA	301	54	6910	2.97588	0.999202	0.248225	31.321
KEGG_PATHWAY	hsa04350:TGF-beta signaling pathway	9	0.00897854	0.0287211	BMP4, SP1, TGFBR1, MAPK3, SMAD5, TGFB3, ID4, ID3, BMPR1B	301	84	6910	2.45966	0.99923	0.240978	31.4507
KEGG_PATHWAY	hsa04666:Fc gamma R-mediated phagocytosis	9	0.00897854	0.0287211	PLD2, MYO10, PLD1, GAB2, LIMK2, GSN, MAPK3, WASF2, FCGR2A	301	84	6910	2.45966	0.99923	0.240978	31.4507
KEGG_PATHWAY	hsa04920:Adipocytokine signaling pathway	8	0.00798093	0.0313722	TNFRSF1A, ACSL1, RXRA, ADIPOR2, NFKBIA, NFKB1, ACACB, STAT3	301	70	6910	2.62364	0.999607	0.252047	33.836
KEGG_PATHWAY	hsa04145:Phagosome	13	0.012969	0.0336894	LAMP2, ATP6V0E1, ITGAV, HLA-A, TLR2, HLA-DPA1, VAMP3, FCGR2A, HLA-DMB, HLA-E, HLA-DMA, ITGB1, CD14	301	153	6910	1.95058	0.999782	0.259986	35.8579
KEGG_PATHWAY	hsa04071:Sphingolipid signaling pathway	11	0.0109738	0.0352213	GNA13, PLD2, TNFRSF1A, MAP3K5, PLD1, GAB2, BCL2, MAPK3, GNA12, FCER1G, NFKB1	301	120	6910	2.10437	0.999852	0.262259	37.1631
KEGG_PATHWAY	hsa05220:Chronic myeloid leukemia	8	0.00798093	0.0358541	CDKN1A, GAB2, HDAC1, TGFBR1, MAPK3, TGFB3, NFKBIA, NFKB1	301	72	6910	2.55076	0.999874	0.25874	37.6952
KEGG_PATHWAY	hsa05215:Prostate cancer	9	0.00897854	0.0365533	FGFR2, FGFR1, CDKN1A, BCL2, MAPK3, PDGFRB, NFKBIA, NFKB1, TCF7L2	301	88	6910	2.34786	0.999895	0.255842	38.2781
KEGG_PATHWAY	hsa05146:Amoebiasis	10	0.00997616	0.0401816	SERPINB9, PTK2, ACTN4, TGFB3, TLR2, SERPINB1, HSPB1, NFKB1, CD14, COL4A5	301	106	6910	2.16574	0.999958	0.270411	41.2232
KEGG_PATHWAY	hsa00071:Fatty acid degradation	6	0.00598569	0.0405956	ACADVL, ALDH7A1, ACSL1, ALDH2, ALDH9A1, HADHB	301	44	6910	3.13047	0.999963	0.265772	41.5508
KEGG_PATHWAY	hsa00410:beta-Alanine metabolism	5	0.00498808	0.0435356	ALDH6A1, ALDH7A1, ALDH2, SMOX, ALDH9A1	301	31	6910	3.70271	0.999982	0.275342	43.8297
KEGG_PATHWAY	hsa04360:Axon guidance	11	0.0109738	0.0488441	SEMA6A, PTK2, PAK2, LIMK2, PLXNB1, EFNA1, PLXNB2, MAPK3, SEMA4D, NFATC3, ITGB1	301	127	6910	1.98839	0.999996	0.2967	47.738
KEGG_PATHWAY	hsa05166:HTLV-I infection	18	0.0179571	0.052708	TSPO, KAT2B, TGFBR1, HLA-A, TGFB3, NFKBIA, NFKB1, HLA-DMB, HLA-E, HLA-DMA, FZD7, TNFRSF1A, CDKN1A, CCND3, RRAS, PDGFRB, HLA-DPA1, NFATC3	301	256	6910	1.61415	0.999998	0.309273	50.4233
KEGG_PATHWAY	hsa05332:Graft-versus-host disease	5	0.00498808	0.0529589	HLA-A, HLA-DPA1, HLA-DMB, HLA-E, HLA-DMA	301	33	6910	3.4783	0.999998	0.303559	50.5931
KEGG_PATHWAY	hsa05212:Pancreatic cancer	7	0.00698331	0.0618534	TGFBR1, ARHGEF6, MAPK3, TGFB3, NFKB1, STAT3, RALGDS	301	65	6910	2.47227	1	0.338562	56.2796
KEGG_PATHWAY	hsa04390:Hippo signaling pathway	12	0.0119714	0.0634804	BMP4, CCND3, TP53BP2, TGFBR1, TGFB3, YAP1, BMPR1B, FGF1, WWTR1, CTNNA1, TCF7L2, FZD7	301	151	6910	1.82438	1	0.338794	57.252
KEGG_PATHWAY	hsa05169:Epstein-Barr virus infection	14	0.0139666	0.0692531	VIM, HLA-A, NFKBIA, NFKB1, HLA-E, STAT3, NUP214, CDKN1A, HSPA2, HDAC1, CD44, BCL2, HSPB1, RBPJ	301	190	6910	1.69155	1	0.356847	60.5434
KEGG_PATHWAY	hsa05231:Choline metabolism in cancer	9	0.00897854	0.0714725	PLD2, PLD1, HIF1A, SP1, MAPK3, WASF2, PDGFRB, SLC22A5, RALGDS	301	101	6910	2.04566	1	0.359132	61.7453
KEGG_PATHWAY	hsa05330:Allograft rejection	5	0.00498808	0.0748402	HLA-A, HLA-DPA1, HLA-DMB, HLA-E, HLA-DMA	301	37	6910	3.10227	1	0.365946	63.5047
KEGG_PATHWAY	hsa05222:Small cell lung cancer	8	0.00798093	0.0752153	PTK2, ITGAV, RXRA, BCL2, NFKBIA, NFKB1, ITGB1, COL4A5	301	85	6910	2.16064	1	0.360676	63.6959
KEGG_PATHWAY	hsa04910:Insulin signaling pathway	11	0.0109738	0.076695	PHKA2, SREBF1, SORBS1, MAPK3, RHOQ, ACACB, TRIP10, RPS6, INSR, LIPE, PYGB	301	138	6910	1.82989	1	0.3599	64.4415
KEGG_PATHWAY	hsa04142:Lysosome	10	0.00997616	0.0794836	SGSH, LAMP2, NPC1, NPC2, LAPTM4A, LITAF, TPP1, ABCA2, SCARB2, CTSH	301	121	6910	1.89726	1	0.364124	65.8083
KEGG_PATHWAY	hsa00620:Pyruvate metabolism	5	0.00498808	0.0937989	ALDH7A1, ALDH2, ACACB, ALDH9A1, PC	301	40	6910	2.8696	1	0.409467	72.0928
KEGG_PATHWAY	hsa00380:Tryptophan metabolism	5	0.00498808	0.0937989	ALDH7A1, MAOB, ALDH2, OGDH, ALDH9A1	301	40	6910	2.8696	1	0.409467	72.0928
KEGG_PATHWAY	hsa05221:Acute myeloid leukemia	6	0.00598569	0.0945017	JUP, MAPK3, NFKB1, ZBTB16, TCF7L2, STAT3	301	56	6910	2.45966	1	0.405231	72.3719
KEGG_PATHWAY	hsa04931:Insulin resistance	9	0.00897854	0.0966039	SREBF1, TNFRSF1A, RPS6KA2, NFKBIA, NFKB1, ACACB, INSR, STAT3, PYGB	301	108	6910	1.91307	1	0.405878	73.1916
KEGG_PATHWAY	hsa05161:Hepatitis B	11	0.0109738	0.0987173	CDKN1A, PTK2B, TGFBR1, BCL2, MAPK3, TGFB3, TLR2, NFKBIA, NFKB1, NFATC3, STAT3	301	145	6910	1.74155	1	0.40655	73.993
