# Supplementary material for: Re-exploring the core genes and modules in the human frontal cortex during chronological aging: insights from network-based analysis of transcriptomic studies
Source: Aging (Albany NY). 2018 Oct 20;10(10):2816–31. doi: 10.18632/aging.101589 (PMC6224233; doi:10.18632/aging.101589)
Supplement: Table S4 [file aging-10-101589-s004.xlsx]

## Sheet: node_table.csv
Table S4. The betweeness (BC) and degree (DC) of centrality of 1260 significant differently expressed genes
Label	Degree	Betweenness
CDC42	30	12193.4
MAPK1	29	9241.11
HRAS	27	7136.24
HDAC1	25	6305.53
MAPK3	24	3638.48
YES1	22	6574.41
STAT3	22	6440.65
MAPK8	19	4197.93
GNAI1	17	7205.27
CDK5	17	3445.45
PPP2CA	16	4965.1
SMAD3	16	4411.48
KAT2B	16	3398.27
CDKN1A	15	5164.23
NFKB1	15	4253.86
PLCB1	15	4127.16
BCL2	14	5227.01
PRKCD	13	3786.35
SP1	13	2989.42
PAK1	13	2220.97
HDAC9	13	1234.52
RAC3	12	2759.74
NFKBIA	12	2381.75
SUMO1	12	1579.76
UBE2D1	11	2789.31
ITGB1	11	1932.86
KIT	11	1741.53
ACTA1	10	3416.9
PAK2	10	3320.33
CDK8	10	2150.88
PDGFRB	10	1818.22
HIF1A	10	1698.14
YWHAZ	10	1385.3
PPP1CA	9	5653.26
BRCA1	9	3403.59
PTK2	9	2686.01
YAP1	9	1287.89
TUBA4A	9	950.56
TUBA1A	9	950.56
RRAS	8	2004.6
PSMA5	8	1506.27
ACTN2	8	1348.23
WWTR1	8	1195.42
EPHB2	8	780.67
CACNA1S	7	2568
VHL	7	1844.95
CTNNA1	7	1683.51
IQGAP1	7	1283.47
RPS6KA3	7	1273.16
CDC6	7	1215.77
EZR	7	1200.36
UBE2D2	7	985.3
PSMD8	7	887.38
BMP4	7	840.28
FGF2	7	229.74
EFNA1	7	68.12
CCT4	6	2181.95
TUBG1	6	1650.59
MEF2C	6	1455.14
ACTN4	6	1011.03
RPS6KA2	6	990.65
ITGAV	6	780.1
EGR1	6	670.42
GJA1	6	660.18
RBPJ	6	618.07
FGFR1	6	604.55
LPAR1	6	509.19
PSMD7	6	507.73
CCNA1	6	458.31
RBL2	6	449.65
CCNC	6	193.86
CCND3	6	175.79
RHOQ	5	3974.57
MYO9B	5	2561.92
TXN	5	1193.21
PDE2A	5	988.17
INSR	5	958.63
RPS6	5	886.33
MED12	5	854.02
CCT2	5	780.46
MCM7	5	765.37
MAPRE1	5	741
PLXNB1	5	727.57
MAP3K5	5	712.64
CAPN2	5	592.33
SDC2	5	526.89
PIK3C2G	5	480.79
TJP2	5	282.63
TUBB2A	5	277.05
MEF2D	5	236.37
SMAD5	5	210.14
BAD	5	186.6
GNA13	5	182.86
ADCY7	5	173.5
TGFBR1	5	139.97
SYNJ2	5	80.13
GAB1	5	61.56
GAB2	5	27.73
CACNA2D1	5	3
HOMER1	4	3990
MYO5A	4	3275
RPH3A	4	1842
SNAP23	4	1840
CYCS	4	1216.91
TNKS	4	1107
ARL2	4	740
SMARCC1	4	740
MYLK	4	728.72
SLC9A3R1	4	581.19
PTK2B	4	526.7
EGR2	4	519.71
UBE2N	4	475.62
TGFB3	4	466.83
CDK5R1	4	418.57
PRKCB	4	418.38
MAP2K6	4	397.23
PDGFRA	4	395.53
CD44	4	378.34
DOCK1	4	374.9
RFC3	4	372
USP14	4	371
SFI1	4	371
RHOG	4	296.65
TCF7L2	4	284.32
PAX6	4	240.03
FGFR3	4	209.55
FGFR2	4	209.55
ZBTB16	4	197.05
ADCY1	4	149.5
TBL1X	4	122.33
TJP1	4	122.14
RALGDS	4	84.54
CCND2	4	30.56
MED8	4	19.1
GNA12	4	14.84
FGF1	4	5.99
RAB27A	3	2561
RGS6	3	1475
PRKCI	3	1198.34
LRP2	3	1147.25
LMO4	3	773.35
GNB5	3	741
DNM2	3	741
HIPK2	3	740
RND1	3	646.92
CCKBR	3	555.5
VAMP1	3	555.5
PTPN21	3	533.85
LMTK2	3	522.36
PRKCZ	3	489.21
BNIP2	3	469.57
TGM2	3	395.15
PLXNB2	3	371.5
CSNK2A1	3	371
TLR2	3	371
UQCRFS1	3	371
EDNRA	3	371
COPS5	3	371
ITGB4	3	347.57
BMPR1B	3	293.41
PSME3	3	251.95
MYO6	3	240.86
FOXO4	3	203.21
PIN1	3	137.55
SDC4	3	130.55
RBBP8	3	112.24
PLEC	3	74.41
EPHA5	3	67.53
EPHA4	3	67.53
EPHA3	3	67.53
ITGA8	3	65.85
SPP1	3	22.1
NUP214	3	7.78
FGF9	3	5.99
TLE4	3	1.87
DUSP3	3	0.6
DUSP6	3	0.6
DUSP7	3	0.6
ARHGEF6	3	0
PLD2	3	0
PIP5K1B	3	0
PSMB6	3	0
ZNF217	3	0
ING2	3	0
ZYX	3	0
TP53BP2	3	0
TUBGCP4	3	0
GRIA1	2	4320
RYR1	2	2912
AGT	2	1107
CLU	2	1066.89
TRIP10	2	1000.79
RAB3A	2	740
TEP1	2	740
LRPAP1	2	740
ATP6AP2	2	740
MAGI1	2	441.2
UBE2K	2	371
WSB1	2	371
KAT6A	2	371
ASCL1	2	371
PDE6D	2	371
ATP6V0D1	2	371
LDB2	2	371
CACNA1H	2	371
ABCA1	2	371
VLDLR	2	371
SLIT2	2	371
RIMS1	2	371
RND2	2	371
PARP4	2	371
GUCY1A2	2	274.71
VAMP3	2	184.5
HCRTR1	2	184.5
ITSN2	2	168.4
SOCS2	2	167.41
SOX9	2	165.04
HTR2A	2	134.86
HSPB1	2	120.32
CD9	2	112.93
AKAP1	2	103.6
SEMA4D	2	91.08
JUP	2	86.66
TGFBR3	2	79
PRKG2	2	64.56
TPM3	2	48.34
MYL12B	2	39.06
ERBB3	2	38.26
GSN	2	23.87
PRKCG	2	23.58
EPHB3	2	19.41
SGK1	2	16.92
RGS4	2	16.36
ACVR2A	2	3.41
ITGB8	2	3.13
TLE2	2	1.87
NMU	2	1
VTI1B	2	1
CDC7	2	0
PTPRR	2	0
CACNB3	2	0
COX5A	2	0
CACNB2	2	0
SIAH2	2	0
STK25	2	0
RAD1	2	0
RAB13	2	0
SIKE1	2	0
RPS4X	2	0
PIP4K2A	2	0
ADRA1D	2	0
SMARCD2	2	0
PTPN13	2	0
ACTL6A	2	0
CACNB4	2	0
CACNB1	2	0
RGS14	2	0
BRD1	1	0
GSR	1	0
STX1A	1	0
KITLG	1	0
CAP2	1	0
MAPK8IP1	1	0
RNF11	1	0
CDC42EP1	1	0
AMOTL2	1	0
XPO7	1	0
HIP1R	1	0
NOTCH2	1	0
LPIN1	1	0
HRK	1	0
HTRA2	1	0
ENPP2	1	0
NOV	1	0
GMPR	1	0
VWF	1	0
RAB27B	1	0
GINS1	1	0
ANXA3	1	0
EXPH5	1	0
PLK2	1	0
NFKBIE	1	0
CDK16	1	0
ADRA2A	1	0
PTPRO	1	0
GRM1	1	0
CETN3	1	0
CHD1	1	0
ERC2	1	0
CDC42EP3	1	0
GEM	1	0
NFATC3	1	0
IGF1	1	0
NTSR2	1	0
CD14	1	0
CDK5R2	1	0
GRM5	1	0
KIF5B	1	0
DDIT4	1	0
MRPS12	1	0
MLC1	1	0
ANGPT2	1	0
AKAP5	1	0
TYMS	1	0
CCNG2	1	0
PLXND1	1	0
KIF1C	1	0
TACC1	1	0
SSBP2	1	0
AATK	1	0
TCF12	1	0
PURA	1	0
EDN3	1	0
PPP2R5E	1	0
BCL11A	1	0
NPY5R	1	0
LIMK2	1	0
SSX2IP	1	0
RDX	1	0
PKN1	1	0
SHANK2	1	0
ANXA2	1	0
ITGB1BP1	1	0
PTGER3	1	0
HIST1H2BK	1	0
MVP	1	0
CACNA1G	1	0
ETF1	1	0
SOX10	1	0
QKI	1	0
SORBS1	1	0
GNG4	1	0
NEK2	1	0
RNF2	1	0
CNR1	1	0
DR1	1	0
GNG5	1	0
RAB3B	1	0
PLTP	1	0
SDHB	1	0
CASK	1	0
RPGR	1	0
RASSF2	1	0
ARHGAP44	1	0
UBE2E3	1	0
IRF2	1	0
CAPN3	1	0
KIF2A	1	0
ETV1	1	0
CEBPD	1	0
PPP2R5C	1	0
RHOBTB2	1	0
STMN2	1	0
PSTPIP1	1	0
UBE2G1	1	0
AQP4	1	0
FNBP1	1	0
ANXA4	1	0
PTPRT	1	0
NAB1	1	0
ATP6V0E1	1	0
DIO2	1	0
RASGRF1	1	0
CAST	1	0
FLNB	1	0
AHNAK	1	0
CCK	1	0
DCAF11	1	0
UBR5	1	0
RELN	1	0
LDB3	1	0
RASGRP1	1	0
TMEM8B	1	0
