# Supplementary material for: Re-exploring the core genes and modules in the human frontal cortex during chronological aging: insights from network-based analysis of transcriptomic studies
Source: Aging (Albany NY). 2018 Oct 20;10(10):2816–31. doi: 10.18632/aging.101589 (PMC6224233; doi:10.18632/aging.101589)
Supplement: Table S5 [file aging-10-101589-s005.xlsx]

## Sheet: 工作表1
Table S5: Gene enrichment analyses using DAVID on the 5 subnetworks and 18 co-expressed PPI Modules counting at least 5 genes，P-value<0.05
DAVID was run at default settings.
subnetwork1
Table S5.1.1: PPI Module 1
Category	Term	Count	%	PValue	Genes	List Total	Pop Hits	Pop Total	Fold Enrichment	Bonferroni	Benjamini	FDR
GOTERM_CC_DIRECT	GO:0005829~cytosol	23	0.482788	5.93007e-12	HRAS, YWHAZ, NFKBIA, BAD, LPIN1, PRKCD, CAPN3, RALGDS, PRKCB, DDIT4, MAPK1, RPS6KA3, DUSP3, RASGRF1, RPS6KA2, RASGRP1, BCL2, MAPK3, MAPK8, MAPK8IP1, NFATC3, DUSP7, DUSP6	29	3315	18224	4.36004	3.73592e-10	3.73592e-10	6.00449e-09
GOTERM_BP_DIRECT	GO:0018105~peptidyl-serine phosphorylation	7	0.146935	4.9681e-08	MAPK1, RPS6KA2, BCL2, MAPK3, MAPK8, PRKCD, PRKCB	29	125	16792	32.4259	2.50886e-05	2.50886e-05	7.16428e-05
GOTERM_BP_DIRECT	GO:0006915~apoptotic process	10	0.209908	2.08331e-07	MAPK1, RPS6KA3, BCL2, MAPK3, HRK, NFKBIA, BAD, CAPN3, PRKCD, PRKCB	29	567	16792	10.2122	0.000105202	5.26022e-05	0.000300425
GOTERM_CC_DIRECT	GO:0005622~intracellular	12	0.251889	2.04998e-06	PLD2, MAPK1, HRAS, RASGRF1, RASGRP1, MAPK3, MAPK8, CAPN3, PRKCD, RALGDS, PRKCB, DDIT4	29	1332	18224	5.66139	0.000129141	6.45725e-05	0.0020757
GOTERM_MF_DIRECT	GO:0016301~kinase activity	7	0.146935	2.30365e-06	MAPK1, RPS6KA3, YWHAZ, RPS6KA2, MAPK3, MAPK8, MAPK8IP1	29	241	16881	16.9076	0.00025337	0.00025337	0.00260269
GOTERM_BP_DIRECT	GO:0000165~MAPK cascade	7	0.146935	3.84739e-06	MAPK1, HRAS, RASGRF1, RASGRP1, MAPK3, DUSP7, DUSP6	29	262	16792	15.4704	0.00194105	0.000647436	0.00554801
GOTERM_BP_DIRECT	GO:0007165~signal transduction	11	0.230898	9.96981e-06	MAPK1, RPS6KA3, HRAS, YWHAZ, RASGRF1, RPS6KA2, RASGRP1, CAPN3, PRKCD, RALGDS, PRKCB	29	1161	16792	5.48611	0.00502213	0.0012579	0.0143761
GOTERM_BP_DIRECT	GO:0038095~Fc-epsilon receptor signaling pathway	6	0.125945	1.02033e-05	MAPK1, HRAS, MAPK3, NFKBIA, MAPK8, NFATC3	29	178	16792	19.518	0.00513945	0.00103001	0.0147127
GOTERM_BP_DIRECT	GO:1900740~positive regulation of protein insertion into mitochondrial membrane involved in apoptotic signaling pathway	4	0.0839631	1.63566e-05	YWHAZ, BCL2, MAPK8, BAD	29	30	16792	77.2046	0.00822613	0.00137575	0.0235846
GOTERM_MF_DIRECT	GO:0004674~protein serine/threonine kinase activity	7	0.146935	2.91857e-05	MAPK1, RPS6KA3, RPS6KA2, MAPK3, MAPK8, PRKCD, PRKCB	29	376	16881	10.837	0.00320532	0.00160395	0.0329698
GOTERM_CC_DIRECT	GO:0005634~nucleus	20	0.419815	3.38348e-05	EGR1, HRAS, YWHAZ, NFKBIA, LPIN1, PRKCD, CAPN3, RALGDS, PRKCB, MAPK1, RPS6KA3, DUSP3, RPS6KA2, BCL2, NAB1, RASSF2, MAPK3, MAPK8, MAPK8IP1, NFATC3	29	5415	18224	2.32101	0.00212936	0.00071029	0.0342543
GOTERM_BP_DIRECT	GO:0018107~peptidyl-threonine phosphorylation	4	0.0839631	3.36841e-05	MAPK1, BCL2, MAPK8, PRKCD	29	38	16792	60.951	0.0168669	0.00242716	0.0485634
GOTERM_BP_DIRECT	GO:0030168~platelet activation	5	0.104954	3.76444e-05	MAPK1, YWHAZ, MAPK3, PRKCD, PRKCB	29	115	16792	25.1754	0.0188312	0.00237353	0.0542716
GOTERM_CC_DIRECT	GO:0005654~nucleoplasm	14	0.293871	9.32298e-05	EGR1, YWHAZ, LPIN1, PRKCD, PRKCB, MAPK1, RPS6KA3, DUSP3, RPS6KA2, MAPK3, MAPK8, NFATC3, DUSP7, DUSP6	29	2784	18224	3.16013	0.00585654	0.00146736	0.0943601
GOTERM_CC_DIRECT	GO:0005737~cytoplasm	19	0.398825	9.43475e-05	EGR1, YWHAZ, HRAS, PTPRR, NFKBIA, LPIN1, PRKCD, CAPN3, PRKCB, DDIT4, MAPK1, RPS6KA3, DUSP3, RPS6KA2, BCL2, RASSF2, MAPK8IP1, NFATC3, DUSP6	29	5222	18224	2.28645	0.00592654	0.00118813	0.0954909
GOTERM_BP_DIRECT	GO:0006468~protein phosphorylation	7	0.146935	8.79473e-05	MAPK1, RPS6KA3, MAPK3, RASSF2, MAPK8, PRKCD, PRKCB	29	456	16792	8.88869	0.0434434	0.00492288	0.12675
GOTERM_BP_DIRECT	GO:0043065~positive regulation of apoptotic process	6	0.125945	0.000123462	RPS6KA2, RASSF2, HRK, MAPK8, BAD, DUSP6	29	300	16792	11.5807	0.0604482	0.00621584	0.177892
GOTERM_MF_DIRECT	GO:0004707~MAP kinase activity	3	0.0629723	0.000238474	MAPK1, MAPK3, MAPK8	29	14	16881	124.736	0.0258941	0.00870695	0.269103
GOTERM_MF_DIRECT	GO:0019901~protein kinase binding	6	0.125945	0.000343878	DUSP3, RPS6KA3, YWHAZ, PTPRR, BAD, PRKCD	29	376	16881	9.28888	0.0371263	0.00941368	0.387835
GOTERM_BP_DIRECT	GO:0007049~cell cycle	5	0.104954	0.000435385	MAPK1, RPS6KA3, MAPK3, RASSF2, PRKCD	29	217	16792	13.3418	0.197415	0.0197939	0.626018
GOTERM_BP_DIRECT	GO:0046579~positive regulation of Ras protein signal transduction	3	0.0629723	0.000450524	HRAS, RASGRF1, RASGRP1	29	19	16792	91.4265	0.20353	0.0187852	0.647721
GOTERM_MF_DIRECT	GO:0004725~protein tyrosine phosphatase activity	4	0.0839631	0.00059337	DUSP3, PTPRR, DUSP7, DUSP6	29	100	16881	23.2841	0.0632043	0.0129731	0.668359
GOTERM_BP_DIRECT	GO:0035335~peptidyl-tyrosine dephosphorylation	4	0.0839631	0.000585088	DUSP3, PTPRR, DUSP7, DUSP6	29	99	16792	23.3953	0.255882	0.0224786	0.840425
GOTERM_BP_DIRECT	GO:0000187~activation of MAPK activity	4	0.0839631	0.00073383	MAPK1, MAPK3, DUSP7, DUSP6	29	107	16792	21.6461	0.309763	0.0261325	1.05303
GOTERM_BP_DIRECT	GO:0051090~regulation of sequence-specific DNA binding transcription factor activity	3	0.0629723	0.000785518	MAPK1, MAPK3, MAPK8	29	25	16792	69.4841	0.32756	0.0261093	1.12681
GOTERM_BP_DIRECT	GO:0000188~inactivation of MAPK activity	3	0.0629723	0.000785518	DUSP3, DUSP7, DUSP6	29	25	16792	69.4841	0.32756	0.0261093	1.12681
GOTERM_BP_DIRECT	GO:0043066~negative regulation of apoptotic process	6	0.125945	0.000838674	RPS6KA3, YWHAZ, BCL2, NFKBIA, MAPK8, CAPN3	29	455	16792	7.63562	0.345385	0.0261342	1.20263
GOTERM_MF_DIRECT	GO:0008134~transcription factor binding	5	0.104954	0.00116795	MAPK1, YWHAZ, BCL2, NAB1, NFKBIA	29	284	16881	10.2483	0.12063	0.0211971	1.31167
GOTERM_BP_DIRECT	GO:0038096~Fc-gamma receptor signaling pathway involved in phagocytosis	4	0.0839631	0.00120539	PLD2, MAPK1, MAPK3, PRKCD	29	127	16792	18.2373	0.456153	0.0351944	1.72425
GOTERM_BP_DIRECT	GO:0031663~lipopolysaccharide-mediated signaling pathway	3	0.0629723	0.00128939	MAPK1, MAPK3, NFKBIA	29	32	16792	54.2845	0.478769	0.0355505	1.84337
GOTERM_MF_DIRECT	GO:0008138~protein tyrosine/serine/threonine phosphatase activity	3	0.0629723	0.00170463	DUSP3, DUSP7, DUSP6	29	37	16881	47.1976	0.171111	0.0264537	1.90912
GOTERM_BP_DIRECT	GO:0043330~response to exogenous dsRNA	3	0.0629723	0.00145536	MAPK1, MAPK3, NFKBIA	29	34	16792	51.0913	0.52073	0.0379704	2.07834
GOTERM_MF_DIRECT	GO:0004672~protein kinase activity	5	0.104954	0.00275041	RPS6KA3, RPS6KA2, RASSF2, PRKCD, PRKCB	29	359	16881	8.10729	0.261373	0.0371621	3.06385
GOTERM_BP_DIRECT	GO:0048538~thymus development	3	0.0629723	0.00232097	MAPK1, BCL2, MAPK3	29	43	16792	40.3978	0.690703	0.0569846	3.29534
GOTERM_CC_DIRECT	GO:0005739~mitochondrion	8	0.167926	0.00330664	MAPK1, YWHAZ, BCL2, MAPK3, HRK, MAPK8, BAD, DDIT4	29	1331	18224	3.77709	0.188332	0.0341795	3.29809
GOTERM_BP_DIRECT	GO:0001666~response to hypoxia	4	0.0839631	0.00286597	EGR1, BAD, PRKCB, DDIT4	29	172	16792	13.4659	0.765287	0.0666907	4.05434
GOTERM_BP_DIRECT	GO:0050853~B cell receptor signaling pathway	3	0.0629723	0.0036367	MAPK1, BCL2, PRKCB	29	54	16792	32.1686	0.841163	0.0802293	5.11825
GOTERM_BP_DIRECT	GO:0070373~negative regulation of ERK1 and ERK2 cascade	3	0.0629723	0.00418364	DUSP3, PTPRR, DUSP6	29	58	16792	29.9501	0.879628	0.0879412	5.86657
GOTERM_BP_DIRECT	GO:0035556~intracellular signal transduction	5	0.104954	0.00424071	RPS6KA3, RASGRF1, RPS6KA2, PRKCD, PRKCB	29	403	16792	7.18405	0.883062	0.0855399	5.94435
GOTERM_BP_DIRECT	GO:0045944~positive regulation of transcription from RNA polymerase II promoter	7	0.146935	0.00486521	EGR1, RPS6KA3, HRAS, MAPK3, NFKBIA, LPIN1, NFATC3	29	981	16792	4.13174	0.914815	0.0938198	6.79141
GOTERM_BP_DIRECT	GO:0000189~MAPK import into nucleus	2	0.0419815	0.00499434	MAPK1, MAPK3	29	3	16792	386.023	0.920218	0.0926695	6.96567
GOTERM_BP_DIRECT	GO:0031281~positive regulation of cyclase activity	2	0.0419815	0.00499434	MAPK3, MAPK8	29	3	16792	386.023	0.920218	0.0926695	6.96567
GOTERM_BP_DIRECT	GO:0061308~cardiac neural crest cell development involved in heart development	2	0.0419815	0.00499434	MAPK1, MAPK3	29	3	16792	386.023	0.920218	0.0926695	6.96567
GOTERM_BP_DIRECT	GO:0046330~positive regulation of JNK cascade	3	0.0629723	0.00522662	HRAS, RASGRP1, RASSF2	29	65	16792	26.7247	0.929091	0.0933633	7.27837
GOTERM_BP_DIRECT	GO:0007265~Ras protein signal transduction	3	0.0629723	0.00603732	HRAS, RASGRP1, RALGDS	29	70	16792	24.8158	0.953022	0.103464	8.36211
GOTERM_BP_DIRECT	GO:0071260~cellular response to mechanical stimulus	3	0.0629723	0.00620594	MAPK3, MAPK8, BAD	29	71	16792	24.4662	0.95688	0.102736	8.58604
GOTERM_BP_DIRECT	GO:0090170~regulation of Golgi inheritance	2	0.0419815	0.00665377	MAPK1, MAPK3	29	4	16792	289.517	0.965658	0.106295	9.17828
GOTERM_BP_DIRECT	GO:0071322~cellular response to carbohydrate stimulus	2	0.0419815	0.00665377	RPS6KA2, PRKCB	29	4	16792	289.517	0.965658	0.106295	9.17828
GOTERM_BP_DIRECT	GO:0070849~response to epidermal growth factor	2	0.0419815	0.00665377	MAPK1, MAPK3	29	4	16792	289.517	0.965658	0.106295	9.17828
GOTERM_BP_DIRECT	GO:0007258~JUN phosphorylation	2	0.0419815	0.00665377	MAPK8, MAPK8IP1	29	4	16792	289.517	0.965658	0.106295	9.17828
GOTERM_BP_DIRECT	GO:0014066~regulation of phosphatidylinositol 3-kinase signaling	3	0.0629723	0.00744588	MAPK1, RASGRP1, MAPK3	29	78	16792	22.2706	0.977045	0.11463	10.2171
GOTERM_BP_DIRECT	GO:0007264~small GTPase mediated signal transduction	4	0.0839631	0.00776426	PLD2, HRAS, RASGRF1, RALGDS	29	246	16792	9.41519	0.980479	0.115743	10.6315
GOTERM_BP_DIRECT	GO:0072584~caveolin-mediated endocytosis	2	0.0419815	0.00831053	MAPK1, MAPK3	29	5	16792	231.614	0.985218	0.119889	11.3384
GOTERM_MF_DIRECT	GO:0005515~protein binding	22	0.461797	0.0111619	EGR1, PLD2, HRAS, YWHAZ, HRK, PTPRR, NFKBIA, BAD, PRKCD, CAPN3, RALGDS, PRKCB, MAPK1, RPS6KA3, RPS6KA2, BCL2, RASSF2, MAPK3, MAPK8, MAPK8IP1, NFATC3, DUSP7	29	8785	16881	1.45774	0.70908	0.128195	11.9106
GOTERM_BP_DIRECT	GO:0009636~response to toxic substance	3	0.0629723	0.0087884	MAPK1, BCL2, MAPK3	29	85	16792	20.4365	0.988412	0.122879	11.9525
GOTERM_BP_DIRECT	GO:0060440~trachea formation	2	0.0419815	0.00996463	MAPK1, MAPK3	29	6	16792	193.011	0.993638	0.134542	13.4473
GOTERM_BP_DIRECT	GO:0045893~positive regulation of transcription, DNA-templated	5	0.104954	0.00998316	EGR1, MAPK1, MAPK3, CAPN3, NFATC3	29	515	16792	5.62169	0.993698	0.131289	13.4706
GOTERM_MF_DIRECT	GO:0005085~guanyl-nucleotide exchange factor activity	3	0.0629723	0.0162661	RASGRF1, RASGRP1, RALGDS	29	118	16881	14.7992	0.835359	0.165063	16.9137
GOTERM_BP_DIRECT	GO:0002223~stimulatory C-type lectin receptor signaling pathway	3	0.0629723	0.0131685	HRAS, NFKBIA, PRKCD	29	105	16792	16.5438	0.998762	0.165503	17.3998
GOTERM_BP_DIRECT	GO:0032872~regulation of stress-activated MAPK cascade	2	0.0419815	0.0132648	MAPK1, MAPK3	29	8	16792	144.759	0.998822	0.162608	17.5161
GOTERM_BP_DIRECT	GO:2000641~regulation of early endosome to late endosome transport	2	0.0419815	0.0132648	MAPK1, MAPK3	29	8	16792	144.759	0.998822	0.162608	17.5161
GOTERM_BP_DIRECT	GO:0042473~outer ear morphogenesis	2	0.0419815	0.014911	MAPK1, MAPK3	29	9	16792	128.674	0.999493	0.17678	19.4783
GOTERM_BP_DIRECT	GO:0060020~Bergmann glial cell differentiation	2	0.0419815	0.014911	MAPK1, MAPK3	29	9	16792	128.674	0.999493	0.17678	19.4783
GOTERM_CC_DIRECT	GO:0005741~mitochondrial outer membrane	3	0.0629723	0.0218411	BCL2, BAD, LPIN1	29	149	18224	12.6526	0.751233	0.180244	20.0368
GOTERM_BP_DIRECT	GO:0046902~regulation of mitochondrial membrane permeability	2	0.0419815	0.0165544	BCL2, BAD	29	10	16792	115.807	0.999782	0.190023	21.394
GOTERM_MF_DIRECT	GO:0017017~MAP kinase tyrosine/serine/threonine phosphatase activity	2	0.0419815	0.0213569	DUSP7, DUSP6	29	13	16881	89.5544	0.906959	0.19417	21.6442
GOTERM_MF_DIRECT	GO:0001784~phosphotyrosine binding	2	0.0419815	0.0213569	MAPK1, MAPK3	29	13	16881	89.5544	0.906959	0.19417	21.6442
GOTERM_CC_DIRECT	GO:0043234~protein complex	4	0.0839631	0.0247283	MAPK1, MAPK3, RASSF2, CAPN3	29	412	18224	6.1011	0.793503	0.17896	22.3948
GOTERM_CC_DIRECT	GO:0031143~pseudopodium	2	0.0419815	0.025812	MAPK1, MAPK3	29	17	18224	73.931	0.807472	0.167279	23.2635
GOTERM_BP_DIRECT	GO:0030278~regulation of ossification	2	0.0419815	0.0181953	MAPK1, MAPK3	29	11	16792	105.279	0.999906	0.202423	23.2643
GOTERM_BP_DIRECT	GO:0001934~positive regulation of protein phosphorylation	3	0.0629723	0.0188676	HRAS, RASGRP1, MAPK3	29	127	16792	13.678	0.999934	0.204693	24.0185
GOTERM_MF_DIRECT	GO:0004697~protein kinase C activity	2	0.0419815	0.0246033	PRKCD, PRKCB	29	15	16881	77.6138	0.935443	0.204155	24.5312
GOTERM_BP_DIRECT	GO:0051092~positive regulation of NF-kappaB transcription factor activity	3	0.0629723	0.0205734	NFKBIA, CAPN3, PRKCB	29	133	16792	13.0609	0.999972	0.21662	25.9014
GOTERM_BP_DIRECT	GO:0060425~lung morphogenesis	2	0.0419815	0.021469	MAPK1, MAPK3	29	13	16792	89.0822	0.999983	0.22049	26.8726
GOTERM_MF_DIRECT	GO:0031435~mitogen-activated protein kinase kinase kinase binding	2	0.0419815	0.0278393	MAPK1, MAPK8IP1	29	17	16881	68.4828	0.95521	0.21251	27.3122
GOTERM_BP_DIRECT	GO:0008283~cell proliferation	4	0.0839631	0.0224808	HRAS, RASGRF1, BCL2, DDIT4	29	366	16792	6.32825	0.99999	0.22521	27.9554
GOTERM_BP_DIRECT	GO:0070498~interleukin-1-mediated signaling pathway	2	0.0419815	0.023102	EGR1, MAPK3	29	14	16792	82.7192	0.999993	0.226318	28.6128
GOTERM_BP_DIRECT	GO:0060397~JAK-STAT cascade involved in growth hormone signaling pathway	2	0.0419815	0.0247323	MAPK1, MAPK3	29	15	16792	77.2046	0.999997	0.235919	30.3117
GOTERM_BP_DIRECT	GO:0008631~intrinsic apoptotic signaling pathway in response to oxidative stress	2	0.0419815	0.0247323	BCL2, PRKCD	29	15	16792	77.2046	0.999997	0.235919	30.3117
GOTERM_BP_DIRECT	GO:0050852~T cell receptor signaling pathway	3	0.0629723	0.025108	MAPK1, HRAS, NFKBIA	29	148	16792	11.7372	0.999997	0.234733	30.6979
GOTERM_MF_DIRECT	GO:0005524~ATP binding	7	0.146935	0.0330504	MAPK1, RPS6KA3, RPS6KA2, MAPK3, MAPK8, PRKCD, PRKCB	29	1495	16881	2.72557	0.975202	0.23208	31.5949
GOTERM_BP_DIRECT	GO:1904355~positive regulation of telomere capping	2	0.0419815	0.0263599	MAPK1, MAPK3	29	16	16792	72.3793	0.999999	0.240666	31.9702
GOTERM_MF_DIRECT	GO:0042802~identical protein binding	5	0.104954	0.033757	MAPK1, YWHAZ, BCL2, NFKBIA, MAPK8IP1	29	749	16881	3.88587	0.977118	0.22262	32.1575
GOTERM_BP_DIRECT	GO:1901216~positive regulation of neuron death	2	0.0419815	0.027985	BAD, DDIT4	29	17	16792	68.1217	0.999999	0.249247	33.5894
GOTERM_BP_DIRECT	GO:0007411~axon guidance	3	0.0629723	0.0286694	MAPK1, HRAS, MAPK3	29	159	16792	10.9252	1	0.250263	34.2606
GOTERM_CC_DIRECT	GO:0005789~endoplasmic reticulum membrane	5	0.104954	0.0412539	PLD2, RASGRP1, BCL2, MAPK8IP1, LPIN1	29	862	18224	3.64509	0.92964	0.233111	34.7262
GOTERM_CC_DIRECT	GO:0005794~Golgi apparatus	5	0.104954	0.0414026	PLD2, MAPK1, HRAS, RASGRP1, MAPK3	29	863	18224	3.64087	0.930324	0.215079	34.8286
GOTERM_BP_DIRECT	GO:0060324~face development	2	0.0419815	0.0296074	MAPK1, MAPK3	29	18	16792	64.3372	1	0.253139	35.1701
GOTERM_MF_DIRECT	GO:0071889~14-3-3 protein binding	2	0.0419815	0.039084	BAD, DDIT4	29	24	16881	48.5086	0.987544	0.23974	36.2654
GOTERM_BP_DIRECT	GO:0045862~positive regulation of proteolysis	2	0.0419815	0.0312273	BAD, CAPN3	29	19	16792	60.951	1	0.260874	36.7133
GOTERM_BP_DIRECT	GO:0051493~regulation of cytoskeleton organization	2	0.0419815	0.0312273	MAPK1, MAPK3	29	19	16792	60.951	1	0.260874	36.7133
GOTERM_CC_DIRECT	GO:0031965~nuclear membrane	3	0.0629723	0.0479774	RPS6KA2, BCL2, LPIN1	29	229	18224	8.2325	0.954838	0.227501	39.2157
GOTERM_BP_DIRECT	GO:0070374~positive regulation of ERK1 and ERK2 cascade	3	0.0629723	0.0341884	HRAS, RASGRP1, MAPK3	29	175	16792	9.92631	1	0.277703	39.4464
GOTERM_BP_DIRECT	GO:2001243~negative regulation of intrinsic apoptotic signaling pathway	2	0.0419815	0.0360711	BCL2, MAPK8IP1	29	22	16792	52.6395	1	0.286319	41.1265
GOTERM_BP_DIRECT	GO:0033137~negative regulation of peptidyl-serine phosphorylation	2	0.0419815	0.0376805	RASSF2, DDIT4	29	23	16792	50.3508	1	0.292746	42.5282
GOTERM_BP_DIRECT	GO:0001836~release of cytochrome c from mitochondria	2	0.0419815	0.0376805	BCL2, BAD	29	23	16792	50.3508	1	0.292746	42.5282
GOTERM_BP_DIRECT	GO:0090398~cellular senescence	2	0.0419815	0.0376805	HRAS, PRKCD	29	23	16792	50.3508	1	0.292746	42.5282
GOTERM_BP_DIRECT	GO:0070371~ERK1 and ERK2 cascade	2	0.0419815	0.0392874	MAPK1, MAPK3	29	24	16792	48.2529	1	0.298893	43.8967
GOTERM_BP_DIRECT	GO:0030878~thyroid gland development	2	0.0419815	0.0408916	MAPK1, MAPK3	29	25	16792	46.3228	1	0.304777	45.2326
GOTERM_BP_DIRECT	GO:0090200~positive regulation of release of cytochrome c from mitochondria	2	0.0419815	0.0456889	HRK, BAD	29	28	16792	41.3596	1	0.329868	49.053
GOTERM_BP_DIRECT	GO:0006974~cellular response to DNA damage stimulus	3	0.0629723	0.046749	MAPK1, BCL2, MAPK3	29	208	16792	8.35146	1	0.331665	49.8631
GOTERM_BP_DIRECT	GO:0051973~positive regulation of telomerase activity	2	0.0419815	0.0472828	MAPK1, MAPK3	29	29	16792	39.9334	1	0.330347	50.2665
GOTERM_BP_DIRECT	GO:0046627~negative regulation of insulin receptor signaling pathway	2	0.0419815	0.0472828	PRKCD, PRKCB	29	29	16792	39.9334	1	0.330347	50.2665
GOTERM_CC_DIRECT	GO:0048471~perinuclear region of cytoplasm	4	0.0839631	0.0686966	HRAS, PTPRR, MAPK8IP1, PRKCD	29	621	18224	4.04775	0.988709	0.29171	51.3557
GOTERM_BP_DIRECT	GO:0097193~intrinsic apoptotic signaling pathway	2	0.0419815	0.0488742	HRAS, BAD	29	30	16792	38.6023	1	0.335118	51.4511
GOTERM_BP_DIRECT	GO:0042100~B cell proliferation	2	0.0419815	0.0520492	BCL2, PRKCD	29	32	16792	36.1897	1	0.348495	53.7365
GOTERM_BP_DIRECT	GO:0032212~positive regulation of telomere maintenance via telomerase	2	0.0419815	0.0520492	MAPK1, MAPK3	29	32	16792	36.1897	1	0.348495	53.7365
GOTERM_BP_DIRECT	GO:2001244~positive regulation of intrinsic apoptotic signaling pathway	2	0.0419815	0.0536329	BCL2, BAD	29	33	16792	35.093	1	0.352715	54.8387
GOTERM_BP_DIRECT	GO:0002931~response to ischemia	2	0.0419815	0.0536329	EGR1, BCL2	29	33	16792	35.093	1	0.352715	54.8387
GOTERM_BP_DIRECT	GO:0097192~extrinsic apoptotic signaling pathway in absence of ligand	2	0.0419815	0.055214	BCL2, BAD	29	34	16792	34.0609	1	0.35678	55.9146
GOTERM_BP_DIRECT	GO:0072593~reactive oxygen species metabolic process	2	0.0419815	0.0567926	BCL2, DDIT4	29	35	16792	33.0877	1	0.360697	56.965
GOTERM_MF_DIRECT	GO:0019902~phosphatase binding	2	0.0419815	0.0720707	MAPK1, MAPK3	29	45	16881	25.8713	0.999733	0.383686	57.0488
GOTERM_BP_DIRECT	GO:0043407~negative regulation of MAP kinase activity	2	0.0419815	0.0583687	PRKCD, DUSP7	29	36	16792	32.1686	1	0.364476	57.9905
GOTERM_BP_DIRECT	GO:0038128~ERBB2 signaling pathway	2	0.0419815	0.0615131	HRAS, PTPRR	29	38	16792	30.4755	1	0.375922	59.9688
GOTERM_BP_DIRECT	GO:0008625~extrinsic apoptotic signaling pathway via death domain receptors	2	0.0419815	0.0615131	BCL2, BAD	29	38	16792	30.4755	1	0.375922	59.9688
GOTERM_MF_DIRECT	GO:0031625~ubiquitin protein ligase binding	3	0.0629723	0.0815459	YWHAZ, BCL2, NFKBIA	29	287	16881	6.08471	0.999914	0.405379	61.7515
GOTERM_BP_DIRECT	GO:0043547~positive regulation of GTPase activity	4	0.0839631	0.0666419	HRAS, RASGRF1, RASGRP1, RALGDS	29	565	16792	4.09936	1	0.396346	63.0104
GOTERM_CC_DIRECT	GO:0005901~caveola	2	0.0419815	0.0952722	MAPK1, MAPK3	29	65	18224	19.3358	0.998178	0.362719	63.7156
GOTERM_BP_DIRECT	GO:0010628~positive regulation of gene expression	3	0.0629723	0.0703018	HRAS, RPS6KA2, MAPK8	29	262	16792	6.63017	1	0.408969	65.0479
GOTERM_BP_DIRECT	GO:0007077~mitotic nuclear envelope disassembly	2	0.0419815	0.0708859	LPIN1, PRKCB	29	44	16792	26.3197	1	0.407231	65.3632
GOTERM_BP_DIRECT	GO:0008630~intrinsic apoptotic signaling pathway in response to DNA damage	2	0.0419815	0.0755384	BCL2, BAD	29	47	16792	24.6398	1	0.423568	67.782
GOTERM_BP_DIRECT	GO:0042542~response to hydrogen peroxide	2	0.0419815	0.0817068	BCL2, BAD	29	51	16792	22.7072	1	0.445486	70.747
GOTERM_BP_DIRECT	GO:0032880~regulation of protein localization	2	0.0419815	0.0832427	BCL2, MAPK8	29	52	16792	22.2706	1	0.447399	71.4447
GOTERM_BP_DIRECT	GO:0019233~sensory perception of pain	2	0.0419815	0.0832427	MAPK1, MAPK3	29	52	16792	22.2706	1	0.447399	71.4447
GOTERM_BP_DIRECT	GO:0045727~positive regulation of translation	2	0.0419815	0.0847761	MAPK1, MAPK3	29	53	16792	21.8504	1	0.449255	72.1258
GOTERM_BP_DIRECT	GO:0016032~viral process	3	0.0629723	0.0882545	MAPK1, MAPK3, NFKBIA	29	299	16792	5.80971	1	0.458784	73.6151
GOTERM_BP_DIRECT	GO:0042493~response to drug	3	0.0629723	0.0907788	BCL2, BAD, DUSP6	29	304	16792	5.71416	1	0.464282	74.6492
GOTERM_BP_DIRECT	GO:0032091~negative regulation of protein binding	2	0.0419815	0.090885	MAPK8, PRKCD	29	57	16792	20.317	1	0.460386	74.6919
GOTERM_BP_DIRECT	GO:0051592~response to calcium ion	2	0.0419815	0.0924061	BAD, CAPN3	29	58	16792	19.9667	1	0.461946	75.2957
GOTERM_BP_DIRECT	GO:0043406~positive regulation of MAP kinase activity	2	0.0419815	0.0939247	HRAS, RASGRP1	29	59	16792	19.6283	1	0.463463	75.8851
GOTERM_BP_DIRECT	GO:0050679~positive regulation of epithelial cell proliferation	2	0.0419815	0.0954409	HRAS, BAD	29	60	16792	19.3011	1	0.464939	76.4605
GOTERM_BP_DIRECT	GO:0006950~response to stress	2	0.0419815	0.0969546	MAPK1, MAPK8	29	61	16792	18.9847	1	0.466375	77.0223
Table S5.1.2: PPI Module 2
Category	Term	Count	%	PValue	Genes	List Total	Pop Hits	Pop Total	Fold Enrichment	Bonferroni	Benjamini	FDR
GOTERM_CC_DIRECT	GO:0005829~cytosol	18	0.447539	2.60796e-09	PRKCZ, MYO6, ACTA1, ARHGEF6, PRKCI, MYO9B, IQGAP1, ANXA2, CDC42, DOCK1, PAK2, ARHGAP44, RAC3, RHOBTB2, AKAP5, PAK1, CDC42EP3, RHOG	23	3315	18224	4.30234	2.86875e-07	2.86875e-07	2.94654e-06
GOTERM_BP_DIRECT	GO:0051056~regulation of small GTPase mediated signal transduction	7	0.174043	1.55019e-08	CDC42, ARHGAP44, RAC3, ARHGEF6, RHOBTB2, MYO9B, RHOG	23	134	16792	38.1389	4.12351e-06	4.12351e-06	2.03349e-05
GOTERM_MF_DIRECT	GO:0005096~GTPase activator activity	7	0.174043	1.15367e-06	DOCK1, CDC42EP1, ARHGAP44, ARHGEF6, MYO9B, CDC42EP3, IQGAP1	23	279	16881	18.4147	8.99824e-05	8.99824e-05	0.00122033
GOTERM_BP_DIRECT	GO:0043547~positive regulation of GTPase activity	8	0.198906	5.16518e-06	FNBP1, DOCK1, CDC42EP1, ARHGAP44, ARHGEF6, MYO9B, CDC42EP3, IQGAP1	23	565	16792	10.3375	0.001373	0.000686735	0.00677531
GOTERM_CC_DIRECT	GO:0031941~filamentous actin	4	0.099453	6.71474e-06	PRKCZ, MYO6, RAC3, PAK1	23	31	18224	102.238	0.000738351	0.000369244	0.00758622
GOTERM_CC_DIRECT	GO:0005622~intracellular	10	0.248633	1.20367e-05	CDC42, PRKCZ, DOCK1, RAC3, ARHGEF6, AKAP5, RHOBTB2, PRKCI, MYO9B, RHOG	23	1332	18224	5.94856	0.00132317	0.000441251	0.0135985
GOTERM_BP_DIRECT	GO:0007264~small GTPase mediated signal transduction	6	0.14918	1.39165e-05	CDC42, DOCK1, RAC3, RHOBTB2, GEM, RHOG	23	246	16792	17.807	0.00369497	0.00123318	0.0182537
GOTERM_BP_DIRECT	GO:0007266~Rho protein signal transduction	4	0.099453	3.67595e-05	CDC42EP1, MYO9B, CDC42EP3, RHOG	23	50	16792	58.407	0.00973056	0.00244157	0.0482092
GOTERM_CC_DIRECT	GO:0005886~plasma membrane	15	0.372949	4.37698e-05	PRKCZ, MYO6, PRKCI, IQGAP1, ANXA2, CDC42, FNBP1, CDC42EP1, PAK2, RAC3, RHOBTB2, AKAP5, PAK1, CDC42EP3, RHOG	23	4121	18224	2.88406	0.00480321	0.00120297	0.049441
GOTERM_CC_DIRECT	GO:0005911~cell-cell junction	5	0.124316	4.90791e-05	CDC42, PRKCZ, PAK1, IQGAP1, ANXA2	23	172	18224	23.0334	0.00538428	0.00107918	0.0554368
GOTERM_CC_DIRECT	GO:0048471~perinuclear region of cytoplasm	7	0.174043	7.14866e-05	PRKCZ, MYO6, PAK2, RAC3, HIP1R, MYO9B, ANXA2	23	621	18224	8.93146	0.00783297	0.00130978	0.0807377
GOTERM_BP_DIRECT	GO:0007165~signal transduction	9	0.223769	6.78976e-05	PRKCZ, DOCK1, PAK2, ARHGAP44, AKAP5, MYO9B, GEM, CDC42EP3, IQGAP1	23	1161	16792	5.65959	0.0178992	0.00360576	0.0890292
GOTERM_MF_DIRECT	GO:0005516~calmodulin binding	5	0.124316	9.50792e-05	MYO6, AKAP5, MYO9B, GEM, IQGAP1	23	189	16881	19.4168	0.0073891	0.0037014	0.100527
GOTERM_MF_DIRECT	GO:0005515~protein binding	21	0.522128	0.000123976	PRKCZ, MYO6, LIMK2, ACTA1, HIP1R, ARHGEF6, PRKCI, MYO9B, GEM, IQGAP1, ANXA2, CDC42, FNBP1, DOCK1, CDC42EP1, PAK2, ARHGAP44, RAC3, AKAP5, PAK1, RHOG	23	8785	16881	1.75448	0.00962409	0.00321838	0.131061
GOTERM_CC_DIRECT	GO:0015629~actin cytoskeleton	5	0.124316	0.000123031	CDC42EP1, ACTA1, MYO9B, CDC42EP3, IQGAP1	23	218	18224	18.1731	0.013443	0.00193159	0.138915
GOTERM_BP_DIRECT	GO:0031274~positive regulation of pseudopodium assembly	3	0.0745898	0.000126696	CDC42, CDC42EP1, CDC42EP3	23	13	16792	168.482	0.0331417	0.00560147	0.166068
GOTERM_CC_DIRECT	GO:0001726~ruffle	4	0.099453	0.000167582	MYO6, PAK1, IQGAP1, ANXA2	23	90	18224	35.2155	0.0182666	0.00230179	0.189175
GOTERM_CC_DIRECT	GO:0005938~cell cortex	4	0.099453	0.000420687	FNBP1, MYO6, MYO9B, ANXA2	23	123	18224	25.7674	0.0452305	0.00512962	0.474275
GOTERM_BP_DIRECT	GO:0098609~cell-cell adhesion	5	0.124316	0.000385926	CDC42EP1, MYO6, PAK2, IQGAP1, ANXA2	23	271	16792	13.4702	0.0975808	0.014561	0.505063
GOTERM_MF_DIRECT	GO:0098641~cadherin binding involved in cell-cell adhesion	5	0.124316	0.000488798	CDC42EP1, MYO6, PAK2, IQGAP1, ANXA2	23	290	16881	12.6544	0.0374176	0.0094886	0.515833
GOTERM_CC_DIRECT	GO:0030496~midbody	4	0.099453	0.000483589	CDC42, GEM, IQGAP1, ANXA2	23	129	18224	24.5689	0.0518169	0.00530663	0.545012
GOTERM_CC_DIRECT	GO:0005913~cell-cell adherens junction	5	0.124316	0.000550495	CDC42EP1, MYO6, PAK2, IQGAP1, ANXA2	23	323	18224	12.2654	0.0587732	0.00549134	0.620203
GOTERM_MF_DIRECT	GO:0043531~ADP binding	3	0.0745898	0.000835362	MYO6, ACTA1, MYO9B	23	33	16881	66.7233	0.0631063	0.0129525	0.880103
GOTERM_BP_DIRECT	GO:1900026~positive regulation of substrate adhesion-dependent cell spreading	3	0.0745898	0.000793601	CDC42, DOCK1, RAC3	23	32	16792	68.4457	0.190373	0.0260523	1.03603
GOTERM_CC_DIRECT	GO:0031252~cell leading edge	3	0.0745898	0.00100333	PRKCZ, PRKCI, IQGAP1	23	39	18224	60.9498	0.104544	0.00915963	1.12775
GOTERM_MF_DIRECT	GO:0004672~protein kinase activity	5	0.124316	0.00108637	PRKCZ, PAK2, LIMK2, PRKCI, PAK1	23	359	16881	10.2222	0.0812883	0.0140311	1.14318
GOTERM_CC_DIRECT	GO:0005925~focal adhesion	5	0.124316	0.00112363	CDC42, CDC42EP1, PAK1, RHOG, IQGAP1	23	391	18224	10.1323	0.116327	0.00946785	1.26218
GOTERM_MF_DIRECT	GO:0004674~protein serine/threonine kinase activity	5	0.124316	0.0012893	PRKCZ, PAK2, LIMK2, PRKCI, PAK1	23	376	16881	9.76006	0.0957324	0.0142729	1.3554
GOTERM_MF_DIRECT	GO:0019901~protein kinase binding	5	0.124316	0.0012893	CDC42, PRKCZ, PAK2, PAK1, IQGAP1	23	376	16881	9.76006	0.0957324	0.0142729	1.3554
GOTERM_MF_DIRECT	GO:0005525~GTP binding	5	0.124316	0.00139345	CDC42, RAC3, RHOBTB2, GEM, RHOG	23	384	16881	9.55673	0.103059	0.0135036	1.46417
GOTERM_CC_DIRECT	GO:0005905~clathrin-coated pit	3	0.0745898	0.00198737	FNBP1, MYO6, HIP1R	23	55	18224	43.219	0.19654	0.0155091	2.22254
GOTERM_MF_DIRECT	GO:0005524~ATP binding	8	0.198906	0.002183	PRKCZ, MYO6, PAK2, ACTA1, LIMK2, PRKCI, MYO9B, PAK1	23	1495	16881	3.92753	0.156723	0.0187617	2.28514
GOTERM_CC_DIRECT	GO:0005737~cytoplasm	14	0.348086	0.00275565	PRKCZ, MYO6, LIMK2, HIP1R, PRKCI, MYO9B, IQGAP1, CDC42, DOCK1, CDC42EP1, PAK2, ARHGAP44, PAK1, CDC42EP3	23	5222	18224	2.12426	0.2618	0.0200327	3.06961
GOTERM_CC_DIRECT	GO:0005884~actin filament	3	0.0745898	0.00276341	ACTA1, MYO9B, IQGAP1	23	65	18224	36.5699	0.262431	0.0188449	3.07813
GOTERM_BP_DIRECT	GO:0006468~protein phosphorylation	5	0.124316	0.00266181	PRKCZ, PAK2, LIMK2, PRKCI, PAK1	23	456	16792	8.00534	0.507857	0.0757532	3.43592
GOTERM_MF_DIRECT	GO:0003924~GTPase activity	4	0.099453	0.00333294	CDC42, RAC3, GEM, RHOG	23	234	16881	12.5463	0.22926	0.0257042	3.46978
GOTERM_CC_DIRECT	GO:0032587~ruffle membrane	3	0.0745898	0.0043578	MYO6, HIP1R, PAK1	23	82	18224	28.9883	0.381467	0.0278636	4.81455
GOTERM_BP_DIRECT	GO:0048010~vascular endothelial growth factor receptor signaling pathway	3	0.0745898	0.00396204	CDC42, DOCK1, PAK2	23	72	16792	30.4203	0.652154	0.100215	5.07432
GOTERM_BP_DIRECT	GO:0031295~T cell costimulation	3	0.0745898	0.00463288	CDC42, PAK2, PAK1	23	78	16792	28.0803	0.709226	0.106217	5.90957
GOTERM_BP_DIRECT	GO:0006915~apoptotic process	5	0.124316	0.00579665	DOCK1, PAK2, HIP1R, ARHGEF6, PAK1	23	567	16792	6.43816	0.786986	0.120908	7.34246
GOTERM_CC_DIRECT	GO:0031256~leading edge membrane	2	0.0497265	0.00961873	CDC42, ARHGAP44	23	8	18224	198.087	0.654645	0.0573551	10.345
GOTERM_CC_DIRECT	GO:0030665~clathrin-coated vesicle membrane	2	0.0497265	0.0132029	MYO6, HIP1R	23	11	18224	144.063	0.768227	0.0740612	13.9433
GOTERM_BP_DIRECT	GO:0018105~peptidyl-serine phosphorylation	3	0.0745898	0.0115205	PRKCZ, PAK2, PRKCI	23	125	16792	17.5221	0.954144	0.211084	14.1012
GOTERM_CC_DIRECT	GO:0070062~extracellular exosome	9	0.223769	0.0133669	CDC42, PRKCZ, MYO6, ACTA1, RAC3, PRKCI, RHOG, IQGAP1, ANXA2	23	2811	18224	2.53687	0.772424	0.0713408	14.1046
GOTERM_BP_DIRECT	GO:0038096~Fc-gamma receptor signaling pathway involved in phagocytosis	3	0.0745898	0.0118749	CDC42, DOCK1, PAK1	23	127	16792	17.2461	0.958315	0.203058	14.5042
GOTERM_CC_DIRECT	GO:0043220~Schmidt-Lanterman incisure	2	0.0497265	0.0143949	PRKCI, ANXA2	23	12	18224	132.058	0.797081	0.0731373	15.1105
GOTERM_BP_DIRECT	GO:0030036~actin cytoskeleton organization	3	0.0745898	0.0124154	CDC42, RAC3, RHOG	23	130	16792	16.8482	0.963962	0.19872	15.1157
GOTERM_MF_DIRECT	GO:0044548~S100 protein binding	2	0.0497265	0.0168162	IQGAP1, ANXA2	23	13	16881	112.916	0.733616	0.113307	16.4221
GOTERM_CC_DIRECT	GO:0030027~lamellipodium	3	0.0745898	0.0157704	ACTA1, RAC3, ARHGEF6	23	160	18224	14.8565	0.825977	0.0764038	16.4394
GOTERM_BP_DIRECT	GO:0006897~endocytosis	3	0.0745898	0.0141007	CDC42, FNBP1, MYO6	23	139	16792	15.7573	0.97712	0.210292	16.9963
GOTERM_BP_DIRECT	GO:0035556~intracellular signal transduction	4	0.099453	0.0150592	PRKCZ, RAC3, PRKCI, MYO9B	23	403	16792	7.24652	0.982336	0.211343	18.0486
GOTERM_MF_DIRECT	GO:0004697~protein kinase C activity	2	0.0497265	0.0193792	PRKCZ, PRKCI	23	15	16881	97.8609	0.782688	0.119444	18.6982
GOTERM_MF_DIRECT	GO:0017049~GTP-Rho binding	2	0.0497265	0.0206584	CDC42EP1, CDC42EP3	23	16	16881	91.7446	0.803723	0.117722	19.813
GOTERM_CC_DIRECT	GO:0051233~spindle midzone	2	0.0497265	0.0227004	CDC42, GEM	23	19	18224	83.405	0.920007	0.104003	22.8509
GOTERM_BP_DIRECT	GO:0016477~cell migration	3	0.0745898	0.0210661	PRKCZ, DOCK1, PRKCI	23	172	16792	12.7341	0.996529	0.269946	24.368
GOTERM_CC_DIRECT	GO:0045121~membrane raft	3	0.0745898	0.0253199	PRKCZ, IQGAP1, ANXA2	23	206	18224	11.539	0.940457	0.110899	25.1553
GOTERM_BP_DIRECT	GO:0031333~negative regulation of protein complex assembly	2	0.0497265	0.022051	CDC42, PRKCZ	23	17	16792	85.8926	0.997345	0.268142	25.3601
GOTERM_BP_DIRECT	GO:0030048~actin filament-based movement	2	0.0497265	0.022051	MYO6, MYO9B	23	17	16792	85.8926	0.997345	0.268142	25.3601
GOTERM_MF_DIRECT	GO:0019904~protein domain specific binding	3	0.0745898	0.0296884	PRKCZ, PRKCI, IQGAP1	23	208	16881	10.5859	0.904704	0.154571	27.2974
GOTERM_BP_DIRECT	GO:1990138~neuron projection extension	2	0.0497265	0.0246145	PRKCZ, IQGAP1	23	19	16792	76.8513	0.998679	0.282132	27.8862
GOTERM_CC_DIRECT	GO:0036464~cytoplasmic ribonucleoprotein granule	2	0.0497265	0.0297661	CDC42, IQGAP1	23	25	18224	63.3878	0.963991	0.1245	28.9234
GOTERM_CC_DIRECT	GO:0005768~endosome	3	0.0745898	0.0298058	PRKCZ, PRKCI, ANXA2	23	225	18224	10.5646	0.964153	0.120163	28.9562
GOTERM_CC_DIRECT	GO:0043005~neuron projection	3	0.0745898	0.0327916	CDC42, RAC3, IQGAP1	23	237	18224	10.0297	0.974461	0.127013	31.3877
GOTERM_CC_DIRECT	GO:0016020~membrane	7	0.174043	0.0416282	CDC42, PRKCZ, DOCK1, MYO6, MYO9B, GEM, ANXA2	23	2200	18224	2.52111	0.990694	0.153835	38.1462
GOTERM_BP_DIRECT	GO:0046326~positive regulation of glucose import	2	0.0497265	0.0385995	PRKCZ, PRKCI	23	30	16792	48.6725	0.999972	0.392628	40.3316
GOTERM_BP_DIRECT	GO:0090004~positive regulation of establishment of protein localization to plasma membrane	2	0.0497265	0.0385995	PRKCI, RHOG	23	30	16792	48.6725	0.999972	0.392628	40.3316
GOTERM_MF_DIRECT	GO:0005547~phosphatidylinositol-3,4,5-trisphosphate binding	2	0.0497265	0.0483994	HIP1R, IQGAP1	23	38	16881	38.6293	0.979133	0.227383	40.8305
GOTERM_CC_DIRECT	GO:0072686~mitotic spindle	2	0.0497265	0.0483705	CDC42, GEM	23	41	18224	38.6511	0.99572	0.171435	42.8883
GOTERM_CC_DIRECT	GO:0043025~neuronal cell body	3	0.0745898	0.0548169	CDC42, RAC3, HIP1R	23	315	18224	7.54617	0.997973	0.186748	47.1101
GOTERM_CC_DIRECT	GO:0016459~myosin complex	2	0.0497265	0.0586854	MYO6, MYO9B	23	50	18224	31.6939	0.998709	0.193135	49.5049
GOTERM_BP_DIRECT	GO:0000278~mitotic cell cycle	2	0.0497265	0.052393	PAK2, PAK1	23	41	16792	35.614	0.999999	0.478308	50.6353
GOTERM_MF_DIRECT	GO:0004702~receptor signaling protein serine/threonine kinase activity	2	0.0497265	0.0668819	PAK2, PAK1	23	53	16881	27.6965	0.995481	0.286423	51.9166
GOTERM_BP_DIRECT	GO:0030838~positive regulation of actin filament polymerization	2	0.0497265	0.0573618	CDC42EP1, CDC42EP3	23	45	16792	32.4483	1	0.494996	53.9249
GOTERM_MF_DIRECT	GO:0048306~calcium-dependent protein binding	2	0.0497265	0.0729663	RAC3, ANXA2	23	58	16881	25.3088	0.997287	0.293639	55.1313
GOTERM_MF_DIRECT	GO:0005546~phosphatidylinositol-4,5-bisphosphate binding	2	0.0497265	0.0729663	HIP1R, ANXA2	23	58	16881	25.3088	0.997287	0.293639	55.1313
GOTERM_BP_DIRECT	GO:0031532~actin cytoskeleton reorganization	2	0.0497265	0.0598369	PRKCZ, PAK1	23	47	16792	31.0675	1	0.495336	55.4869
GOTERM_CC_DIRECT	GO:0005856~cytoskeleton	3	0.0745898	0.0730773	FNBP1, HIP1R, AKAP5	23	371	18224	6.40713	0.999763	0.229607	57.5723
GOTERM_MF_DIRECT	GO:0003774~motor activity	2	0.0497265	0.0826225	MYO6, MYO9B	23	66	16881	22.2411	0.998801	0.31181	59.8356
GOTERM_CC_DIRECT	GO:0030175~filopodium	2	0.0497265	0.0823399	CDC42, ACTA1	23	71	18224	22.3197	0.999921	0.249058	62.1234
GOTERM_CC_DIRECT	GO:0045177~apical part of cell	2	0.0497265	0.0867807	CDC42, MYO6	23	75	18224	21.1293	0.999954	0.254498	64.1435
GOTERM_CC_DIRECT	GO:0043234~protein complex	3	0.0745898	0.0875377	PRKCI, PAK1, IQGAP1	23	412	18224	5.76952	0.999958	0.250173	64.4779
GOTERM_MF_DIRECT	GO:0005089~Rho guanyl-nucleotide exchange factor activity	2	0.0497265	0.0957431	DOCK1, ARHGEF6	23	77	16881	19.0638	0.99961	0.338444	65.5124
GOTERM_BP_DIRECT	GO:0033138~positive regulation of peptidyl-serine phosphorylation	2	0.0497265	0.0878581	CDC42, PAK1	23	70	16792	20.8596	1	0.624107	70.0697
GOTERM_BP_DIRECT	GO:0032869~cellular response to insulin stimulus	2	0.0497265	0.0962268	PRKCI, PAK1	23	77	16792	18.9633	1	0.644815	73.4782
Table S5.1.3: PPI Module 3
Category	Term	Count	%	PValue	Genes	List Total	Pop Hits	Pop Total	Fold Enrichment	Bonferroni	Benjamini	FDR
GOTERM_CC_DIRECT	GO:0005654~nucleoplasm	17	0.459211	7.98275e-10	MEF2C, ING2, KAT2B, TLE4, TLE2, TCF7L2, NOTCH2, MEF2D, SUMO1, NUP214, ZNF217, HDAC1, HIST1H2BK, BCL11A, IRF2, HDAC9, RBPJ	22	2784	18224	5.05825	4.55017e-08	4.55017e-08	7.91266e-07
GOTERM_BP_DIRECT	GO:0000122~negative regulation of transcription from RNA polymerase II promoter	11	0.297137	4.53455e-09	MEF2C, ZNF217, HDAC1, DR1, BCL11A, TLE4, IRF2, ZBTB16, RBPJ, HDAC9, TCF7L2	22	720	16792	11.6611	1.47826e-06	1.47826e-06	6.13628e-06
GOTERM_CC_DIRECT	GO:0005634~nucleus	19	0.513236	1.58275e-07	MEF2C, ING2, KAT2B, TLE4, TLE2, ZBTB16, TCF7L2, NOTCH2, MEF2D, SUMO1, NUP214, HDAC1, HIST1H2BK, DR1, BCL11A, ETV1, CHD1, RBPJ, HDAC9	22	5415	18224	2.90654	9.02162e-06	4.51082e-06	0.000156885
GOTERM_MF_DIRECT	GO:0000978~RNA polymerase II core promoter proximal region sequence-specific DNA binding	8	0.216099	1.5469e-07	MEF2C, MEF2D, ZNF217, HDAC1, BCL11A, ETV1, RBPJ, TCF7L2	22	355	16881	17.2917	1.29939e-05	1.29939e-05	0.000166042
GOTERM_BP_DIRECT	GO:0006351~transcription, DNA-templated	13	0.351162	6.41556e-07	MEF2C, MEF2D, ZNF217, ING2, HDAC1, DR1, BCL11A, TLE4, CHD1, TLE2, ZBTB16, HDAC9, TCF7L2	22	1955	16792	5.07547	0.000209125	0.000104568	0.000868168
GOTERM_MF_DIRECT	GO:0008134~transcription factor binding	7	0.189087	9.43738e-07	SUMO1, KAT2B, HDAC1, DR1, RBPJ, HDAC9, TCF7L2	22	284	16881	18.9128	7.92709e-05	3.96362e-05	0.00101299
GOTERM_BP_DIRECT	GO:0045892~negative regulation of transcription, DNA-templated	8	0.216099	1.58887e-06	SUMO1, ZNF217, HDAC1, TLE2, ZBTB16, RBPJ, HDAC9, TCF7L2	22	499	16792	12.2368	0.000517839	0.000172643	0.00215009
GOTERM_MF_DIRECT	GO:0042826~histone deacetylase binding	5	0.135062	6.94778e-06	MEF2C, MEF2D, KAT2B, HDAC1, HDAC9	22	102	16881	37.6136	0.000583445	0.00019452	0.00745739
GOTERM_MF_DIRECT	GO:0003700~transcription factor activity, sequence-specific DNA binding	9	0.243112	1.12071e-05	MEF2C, MEF2D, ZNF217, HDAC1, ETV1, IRF2, ZBTB16, RBPJ, TCF7L2	22	961	16881	7.18612	0.000940957	0.000235322	0.0120289
GOTERM_BP_DIRECT	GO:0045944~positive regulation of transcription from RNA polymerase II promoter	9	0.243112	1.35478e-05	MEF2C, MEF2D, KAT2B, HDAC1, BCL11A, ETV1, IRF2, RBPJ, TCF7L2	22	981	16792	7.0025	0.00440688	0.00110355	0.0183317
GOTERM_BP_DIRECT	GO:1904837~beta-catenin-TCF complex assembly	4	0.10805	2.01442e-05	HDAC1, TLE4, TLE2, TCF7L2	22	43	16792	71.0021	0.00654557	0.00131256	0.0272563
GOTERM_MF_DIRECT	GO:0003682~chromatin binding	6	0.162075	9.73509e-05	MEF2C, KAT2B, ING2, HDAC1, TLE4, RBPJ	22	391	16881	11.7747	0.00814452	0.00163424	0.104445
GOTERM_BP_DIRECT	GO:0008285~negative regulation of cell proliferation	6	0.162075	0.00010595	NOTCH2, KAT2B, ING2, HDAC1, ZBTB16, RBPJ	22	396	16792	11.5647	0.0339517	0.00574036	0.143279
GOTERM_MF_DIRECT	GO:0033613~activating transcription factor binding	3	0.0810373	0.000335408	MEF2C, MEF2D, HDAC1	22	22	16881	104.634	0.0277857	0.00468548	0.359434
GOTERM_MF_DIRECT	GO:0001103~RNA polymerase II repressing transcription factor binding	3	0.0810373	0.000507738	HDAC1, RBPJ, TCF7L2	22	27	16881	85.2576	0.0417637	0.00607587	0.543654
GOTERM_CC_DIRECT	GO:0000118~histone deacetylase complex	3	0.0810373	0.000778155	ZNF217, HDAC1, HDAC9	22	36	18224	69.0303	0.0434021	0.0146819	0.768654
GOTERM_MF_DIRECT	GO:0070491~repressing transcription factor binding	3	0.0810373	0.000855549	HDAC1, TLE4, HDAC9	22	35	16881	65.7701	0.0693732	0.00894685	0.91452
GOTERM_MF_DIRECT	GO:0005515~protein binding	19	0.513236	0.00136162	MEF2C, KAT2B, ING2, TLE4, ZBTB16, TLE2, TCF7L2, NOTCH2, MEF2D, SUMO1, NUP214, ZNF217, HDAC1, DR1, CHD1, IRF2, ETV1, RBPJ, HDAC9	22	8785	16881	1.65954	0.108147	0.0126366	1.4519
GOTERM_MF_DIRECT	GO:0003714~transcription corepressor activity	4	0.10805	0.00194234	DR1, TLE4, TLE2, HDAC9	22	203	16881	15.1196	0.150676	0.0161989	2.06528
GOTERM_MF_DIRECT	GO:0000977~RNA polymerase II regulatory region sequence-specific DNA binding	4	0.10805	0.00208184	MEF2C, MEF2D, KAT2B, IRF2	22	208	16881	14.7561	0.160591	0.0157883	2.21211
GOTERM_BP_DIRECT	GO:0006355~regulation of transcription, DNA-templated	8	0.216099	0.00172014	MEF2C, NOTCH2, SUMO1, ZNF217, ING2, HDAC1, IRF2, TLE2	22	1504	16792	4.05996	0.429503	0.0770481	2.30281
GOTERM_MF_DIRECT	GO:0044212~transcription regulatory region DNA binding	4	0.10805	0.00222746	MEF2C, ZNF217, HDAC1, TCF7L2	22	213	16881	14.4097	0.170818	0.0154884	2.36517
GOTERM_MF_DIRECT	GO:0046982~protein heterodimerization activity	5	0.135062	0.00234364	MEF2C, MEF2D, HIST1H2BK, DR1, BCL11A	22	465	16881	8.25073	0.178889	0.0150469	2.48712
GOTERM_MF_DIRECT	GO:0000980~RNA polymerase II distal enhancer sequence-specific DNA binding	3	0.0810373	0.00292438	MEF2C, HDAC1, ZBTB16	22	65	16881	35.4147	0.218084	0.0174185	3.09469
GOTERM_MF_DIRECT	GO:0001077~transcriptional activator activity, RNA polymerase II core promoter proximal region sequence-specific binding	4	0.10805	0.00297871	MEF2C, MEF2D, ETV1, RBPJ	22	236	16881	13.0054	0.221655	0.0165669	3.15135
GOTERM_MF_DIRECT	GO:0003677~DNA binding	8	0.216099	0.00309881	MEF2C, ING2, HIST1H2BK, DR1, CHD1, IRF2, ZBTB16, RBPJ	22	1674	16881	3.66699	0.229491	0.016162	3.27651
GOTERM_CC_DIRECT	GO:0016605~PML body	3	0.0810373	0.00562375	SUMO1, ZBTB16, TCF7L2	22	98	18224	25.3581	0.274909	0.0772202	5.43673
GOTERM_CC_DIRECT	GO:0005737~cytoplasm	13	0.351162	0.00582282	MEF2C, MEF2D, SUMO1, ING2, HIST1H2BK, HDAC1, UBE2G1, BCL11A, CHD1, IRF2, RBPJ, HDAC9, TCF7L2	22	5222	18224	2.06218	0.283137	0.0644065	5.62422
GOTERM_BP_DIRECT	GO:0048133~male germ-line stem cell asymmetric division	2	0.0540249	0.00499345	ING2, ZBTB16	22	4	16792	381.636	0.804451	0.184532	6.54985
GOTERM_BP_DIRECT	GO:0006338~chromatin remodeling	3	0.0810373	0.00511074	KAT2B, HDAC1, CHD1	22	86	16792	26.6258	0.811823	0.169392	6.6988
GOTERM_BP_DIRECT	GO:0007517~muscle organ development	3	0.0810373	0.00546336	MEF2C, MEF2D, ETV1	22	89	16792	25.7283	0.83236	0.163554	7.14531
GOTERM_BP_DIRECT	GO:0016032~viral process	4	0.10805	0.00586105	SUMO1, NUP214, KAT2B, HDAC1	22	299	16792	10.211	0.852853	0.159881	7.64651
GOTERM_BP_DIRECT	GO:0007219~Notch signaling pathway	3	0.0810373	0.00896832	NOTCH2, KAT2B, RBPJ	22	115	16792	19.9115	0.946968	0.217091	11.4771
GOTERM_BP_DIRECT	GO:0016925~protein sumoylation	3	0.0810373	0.00927045	SUMO1, NUP214, BCL11A	22	117	16792	19.5711	0.951986	0.208289	11.8416
GOTERM_MF_DIRECT	GO:0033558~protein deacetylase activity	2	0.0540249	0.0123739	HDAC1, HDAC9	22	10	16881	153.464	0.648622	0.0596687	12.5102
GOTERM_BP_DIRECT	GO:0003139~secondary heart field specification	2	0.0540249	0.00996315	MEF2C, RBPJ	22	8	16792	190.818	0.961775	0.207975	12.6721
GOTERM_CC_DIRECT	GO:0016580~Sin3 complex	2	0.0540249	0.014882	ING2, HDAC1	22	13	18224	127.441	0.574567	0.132762	13.8105
GOTERM_BP_DIRECT	GO:0070933~histone H4 deacetylation	2	0.0540249	0.0112019	HDAC1, HDAC9	22	9	16792	169.616	0.974585	0.217161	14.1392
GOTERM_BP_DIRECT	GO:0061314~Notch signaling involved in heart development	2	0.0540249	0.0112019	NOTCH2, RBPJ	22	9	16792	169.616	0.974585	0.217161	14.1392
GOTERM_MF_DIRECT	GO:0032041~NAD-dependent histone deacetylase activity (H3-K14 specific)	2	0.0540249	0.0148311	HDAC1, HDAC9	22	12	16881	127.886	0.714965	0.0673546	14.8186
GOTERM_BP_DIRECT	GO:0007050~cell cycle arrest	3	0.0810373	0.0132431	NOTCH2, KAT2B, TCF7L2	22	141	16792	16.2398	0.987043	0.237864	16.5069
GOTERM_CC_DIRECT	GO:0005671~Ada2/Gcn5/Ada3 transcription activator complex	2	0.0540249	0.0182862	KAT2B, DR1	22	16	18224	103.545	0.650748	0.139533	16.7177
GOTERM_BP_DIRECT	GO:0006367~transcription initiation from RNA polymerase II promoter	3	0.0810373	0.0152716	NOTCH2, KAT2B, RBPJ	22	152	16792	15.0646	0.993375	0.255553	18.7999
GOTERM_CC_DIRECT	GO:0016607~nuclear speck	3	0.0810373	0.0221497	MEF2C, SUMO1, ZBTB16	22	201	18224	12.3636	0.72105	0.147507	19.9101
GOTERM_BP_DIRECT	GO:0090090~negative regulation of canonical Wnt signaling pathway	3	0.0810373	0.0174257	HDAC1, TLE2, TCF7L2	22	163	16792	14.048	0.996756	0.272674	21.1709
GOTERM_BP_DIRECT	GO:0030279~negative regulation of ossification	2	0.0540249	0.0198317	MEF2C, RBPJ	22	16	16792	95.4091	0.998541	0.290851	23.7433
GOTERM_BP_DIRECT	GO:0016055~Wnt signaling pathway	3	0.0810373	0.0225448	TLE4, TLE2, TCF7L2	22	187	16792	12.245	0.999409	0.310429	26.5507
GOTERM_BP_DIRECT	GO:0006366~transcription from RNA polymerase II promoter	4	0.10805	0.0250422	MEF2C, MEF2D, ETV1, IRF2	22	513	16792	5.95144	0.999743	0.325444	29.0499
GOTERM_BP_DIRECT	GO:0045893~positive regulation of transcription, DNA-templated	4	0.10805	0.0252963	MEF2C, ING2, HDAC1, ZBTB16	22	515	16792	5.92833	0.999764	0.315912	29.2998
GOTERM_BP_DIRECT	GO:0070932~histone H3 deacetylation	2	0.0540249	0.0259519	HDAC1, HDAC9	22	21	16792	72.6926	0.999811	0.311126	29.9406
GOTERM_BP_DIRECT	GO:0060045~positive regulation of cardiac muscle cell proliferation	2	0.0540249	0.0271716	MEF2C, RBPJ	22	22	16792	69.3884	0.999874	0.312152	31.1184
GOTERM_CC_DIRECT	GO:0016604~nuclear body	2	0.0540249	0.0373662	SUMO1, ZBTB16	22	33	18224	50.2039	0.8859	0.214305	31.4412
GOTERM_BP_DIRECT	GO:0001958~endochondral ossification	2	0.0540249	0.0320357	MEF2C, MEF2D	22	26	16792	58.7133	0.999975	0.345958	35.6358
GOTERM_BP_DIRECT	GO:0006915~apoptotic process	4	0.10805	0.0324011	MEF2C, NOTCH2, MEF2D, ZBTB16	22	567	16792	5.38464	0.999978	0.338329	35.9638
GOTERM_MF_DIRECT	GO:0004407~histone deacetylase activity	2	0.0540249	0.0474389	HDAC1, HDAC9	22	39	16881	39.3497	0.983135	0.193352	40.6475
GOTERM_BP_DIRECT	GO:0001975~response to amphetamine	2	0.0540249	0.0380833	HDAC1, HDAC9	22	31	16792	49.2434	0.999997	0.374251	40.8695
GOTERM_BP_DIRECT	GO:0001974~blood vessel remodeling	2	0.0540249	0.0392885	MEF2C, RBPJ	22	32	16792	47.7045	0.999998	0.372906	41.8642
GOTERM_BP_DIRECT	GO:0001568~blood vessel development	2	0.0540249	0.0464895	MEF2C, TCF7L2	22	38	16792	40.1722	1	0.414415	47.4919
GOTERM_BP_DIRECT	GO:0002062~chondrocyte differentiation	2	0.0540249	0.0476847	MEF2C, MEF2D	22	39	16792	39.1422	1	0.411945	48.3756
GOTERM_BP_DIRECT	GO:0007399~nervous system development	3	0.0810373	0.0493826	MEF2C, NOTCH2, MEF2D	22	287	16792	7.97846	1	0.412908	49.6073
GOTERM_MF_DIRECT	GO:0035064~methylated histone binding	2	0.0540249	0.0639394	ING2, CHD1	22	53	16881	28.9554	0.996114	0.242336	50.7982
GOTERM_BP_DIRECT	GO:0043966~histone H3 acetylation	2	0.0540249	0.0524511	KAT2B, DR1	22	43	16792	35.5011	1	0.422397	51.7645
GOTERM_CC_DIRECT	GO:0005925~focal adhesion	3	0.0810373	0.0737634	NUP214, IRF2, TLE2	22	391	18224	6.35573	0.987319	0.353877	53.2113
GOTERM_BP_DIRECT	GO:0016575~histone deacetylation	2	0.0540249	0.056011	HDAC1, HDAC9	22	46	16792	33.1858	1	0.434147	54.1599
GOTERM_BP_DIRECT	GO:0003151~outflow tract morphogenesis	2	0.0540249	0.056011	MEF2C, RBPJ	22	46	16792	33.1858	1	0.434147	54.1599
GOTERM_BP_DIRECT	GO:0035914~skeletal muscle cell differentiation	2	0.0540249	0.0595581	MEF2C, MEF2D	22	49	16792	31.154	1	0.44499	56.4367
GOTERM_BP_DIRECT	GO:0042733~embryonic digit morphogenesis	2	0.0540249	0.0677854	HDAC1, ZBTB16	22	56	16792	27.2597	1	0.479929	61.3206
GOTERM_BP_DIRECT	GO:0006959~humoral immune response	2	0.0540249	0.0689552	MEF2C, RBPJ	22	57	16792	26.7815	1	0.476386	61.9722
GOTERM_BP_DIRECT	GO:0030097~hemopoiesis	2	0.0540249	0.0712904	NOTCH2, ZBTB16	22	59	16792	25.8737	1	0.47881	63.2428
GOTERM_BP_DIRECT	GO:0043433~negative regulation of sequence-specific DNA binding transcription factor activity	2	0.0540249	0.0724559	SUMO1, TCF7L2	22	60	16792	25.4424	1	0.475477	63.8622
GOTERM_BP_DIRECT	GO:0030183~B cell differentiation	2	0.0540249	0.07942	RBPJ, HDAC9	22	66	16792	23.1295	1	0.499284	67.366
GOTERM_BP_DIRECT	GO:0060021~palate development	2	0.0540249	0.0909161	MEF2C, SUMO1	22	76	16792	20.0861	1	0.540144	72.4693
GOTERM_BP_DIRECT	GO:0032869~cellular response to insulin stimulus	2	0.0540249	0.0920582	KAT2B, HDAC9	22	77	16792	19.8253	1	0.536008	72.9337
Table S5.1.4: PPI Module 4
Category	Term	Count	%	PValue	Genes	List Total	Pop Hits	Pop Total	Fold Enrichment	Bonferroni	Benjamini	FDR
GOTERM_CC_DIRECT	GO:0005874~microtubule	10	0.425351	2.0319e-13	TUBGCP4, CCT4, TUBB2A, NEK2, TUBA4A, CCT2, TUBG1, MAPRE1, TUBA1A, KIF2A	15	311	18224	39.0654	1.27998e-11	1.27998e-11	2.05724e-10
GOTERM_CC_DIRECT	GO:0005813~centrosome	10	0.425351	3.45999e-12	TUBGCP4, ARL2, CCT4, RPGR, NEK2, CETN3, SFI1, TUBG1, MAPRE1, KIF2A	15	426	18224	28.5196	2.17981e-10	1.0899e-10	3.50345e-09
GOTERM_BP_DIRECT	GO:0000086~G2/M transition of mitotic cell cycle	6	0.255211	6.33984e-08	NEK2, TUBA4A, SFI1, TUBG1, MAPRE1, TUBA1A	15	137	16792	49.0277	4.88166e-06	4.88166e-06	6.6889e-05
GOTERM_MF_DIRECT	GO:0005200~structural constituent of cytoskeleton	5	0.212675	1.62466e-06	TUBGCP4, TUBB2A, TUBA4A, TUBG1, TUBA1A	15	110	16881	51.1545	5.19877e-05	5.19877e-05	0.00140708
GOTERM_CC_DIRECT	GO:0005829~cytosol	12	0.510421	1.50256e-06	TUBGCP4, ARL2, CCT4, PDE6D, NEK2, TUBA4A, CCT2, SFI1, TUBG1, MAPRE1, TUBA1A, KIF2A	15	3315	18224	4.39795	9.4657e-05	3.15533e-05	0.00152142
GOTERM_MF_DIRECT	GO:0003924~GTPase activity	5	0.212675	3.22959e-05	ARL2, TUBB2A, TUBA4A, TUBG1, TUBA1A	15	234	16881	24.047	0.00103295	0.00051661	0.0279675
GOTERM_MF_DIRECT	GO:0005515~protein binding	15	0.638026	0.000106329	ARL2, RPGR, NEK2, TUBB2A, CETN3, CCT2, SFI1, TUBGCP4, PDE6D, CCT4, TUBA4A, MAPRE1, TUBG1, TUBA1A, KIF2A	15	8785	16881	1.92157	0.00339692	0.00113359	0.092052
GOTERM_BP_DIRECT	GO:0051301~cell division	5	0.212675	0.000157396	NEK2, CETN3, MAPRE1, TUBA1A, KIF2A	15	350	16792	15.9924	0.0120473	0.00604189	0.165937
GOTERM_MF_DIRECT	GO:0005525~GTP binding	5	0.212675	0.000220208	ARL2, TUBB2A, TUBA4A, TUBG1, TUBA1A	15	384	16881	14.6536	0.00702264	0.0017603	0.190557
GOTERM_BP_DIRECT	GO:0051973~positive regulation of telomerase activity	3	0.127605	0.000258721	CCT4, NEK2, CCT2	15	29	16792	115.807	0.0197269	0.00661935	0.272629
GOTERM_BP_DIRECT	GO:0032212~positive regulation of telomere maintenance via telomerase	3	0.127605	0.000315621	CCT4, NEK2, CCT2	15	32	16792	104.95	0.0240136	0.00605824	0.332497
GOTERM_BP_DIRECT	GO:0007017~microtubule-based process	3	0.127605	0.000400127	TUBB2A, TUBA4A, TUBA1A	15	36	16792	93.2889	0.0303459	0.00614423	0.421351
GOTERM_BP_DIRECT	GO:0090307~mitotic spindle assembly	3	0.127605	0.000400127	TUBGCP4, NEK2, KIF2A	15	36	16792	93.2889	0.0303459	0.00614423	0.421351
GOTERM_CC_DIRECT	GO:0005881~cytoplasmic microtubule	3	0.127605	0.000683874	TUBG1, MAPRE1, TUBA1A	15	51	18224	71.4667	0.0421833	0.0107169	0.690303
GOTERM_CC_DIRECT	GO:0036064~ciliary basal body	3	0.127605	0.00249735	RPGR, CETN3, TUBG1	15	98	18224	37.1918	0.145749	0.0310148	2.50009
GOTERM_CC_DIRECT	GO:0000922~spindle pole	3	0.127605	0.00307778	TUBGCP4, NEK2, KIF2A	15	109	18224	33.4385	0.176506	0.0318483	3.07302
GOTERM_CC_DIRECT	GO:0055037~recycling endosome	3	0.127605	0.0031334	TUBGCP4, TUBG1, TUBA1A	15	110	18224	33.1345	0.179396	0.0278497	3.12776
GOTERM_CC_DIRECT	GO:0005814~centriole	3	0.127605	0.0033031	CETN3, SFI1, TUBG1	15	113	18224	32.2549	0.18815	0.0257185	3.29461
GOTERM_BP_DIRECT	GO:0090666~scaRNA localization to Cajal body	2	0.0850702	0.00333105	CCT4, CCT2	15	4	16792	559.733	0.226569	0.041916	3.45908
GOTERM_CC_DIRECT	GO:0002199~zona pellucida receptor complex	2	0.0850702	0.00689426	CCT4, CCT2	15	9	18224	269.985	0.35328	0.0472731	6.76527
GOTERM_CC_DIRECT	GO:0005832~chaperonin-containing T-complex	2	0.0850702	0.00689426	CCT4, CCT2	15	9	18224	269.985	0.35328	0.0472731	6.76527
GOTERM_BP_DIRECT	GO:1904871~positive regulation of protein localization to Cajal body	2	0.0850702	0.00665179	CCT4, CCT2	15	8	16792	279.867	0.401841	0.0707841	6.79929
GOTERM_CC_DIRECT	GO:0000930~gamma-tubulin complex	2	0.0850702	0.00765756	TUBGCP4, TUBG1	15	10	18224	242.987	0.383861	0.0472743	7.48833
GOTERM_BP_DIRECT	GO:1904851~positive regulation of establishment of protein localization to telomere	2	0.0850702	0.00748037	CCT4, CCT2	15	9	16792	248.77	0.439067	0.0697196	7.61624
GOTERM_BP_DIRECT	GO:0007010~cytoskeleton organization	3	0.127605	0.00770796	TUBB2A, TUBA4A, TUBA1A	15	161	16792	20.8596	0.448885	0.0640576	7.8395
GOTERM_MF_DIRECT	GO:0005095~GTPase inhibitor activity	2	0.0850702	0.0115527	ARL2, PDE6D	15	14	16881	160.771	0.310535	0.0716699	9.57402
GOTERM_BP_DIRECT	GO:1904874~positive regulation of telomerase RNA localization to Cajal body	2	0.0850702	0.0124384	CCT4, CCT2	15	15	16792	149.262	0.618545	0.0918777	12.3707
GOTERM_BP_DIRECT	GO:0007020~microtubule nucleation	2	0.0850702	0.0149088	TUBGCP4, TUBG1	15	18	16792	124.385	0.685452	0.0998079	14.656
GOTERM_BP_DIRECT	GO:0007067~mitotic nuclear division	3	0.127605	0.0175871	NEK2, CETN3, MAPRE1	15	248	16792	13.5419	0.74494	0.107612	17.0727
GOTERM_CC_DIRECT	GO:0000794~condensed nuclear chromosome	2	0.0850702	0.0213041	NEK2, TUBG1	15	28	18224	86.781	0.742481	0.116031	19.5912
GOTERM_BP_DIRECT	GO:0031122~cytoplasmic microtubule organization	2	0.0850702	0.0279875	TUBGCP4, TUBG1	15	34	16792	65.851	0.887608	0.154761	25.8808
GOTERM_BP_DIRECT	GO:0007339~binding of sperm to zona pellucida	2	0.0850702	0.0287995	CCT4, CCT2	15	35	16792	63.9695	0.894613	0.148472	26.5315
GOTERM_BP_DIRECT	GO:1901998~toxin transport	2	0.0850702	0.0296109	CCT4, CCT2	15	36	16792	62.1926	0.901182	0.142984	27.1765
GOTERM_BP_DIRECT	GO:0034260~negative regulation of GTPase activity	2	0.0850702	0.0352732	ARL2, PDE6D	15	43	16792	52.0682	0.93703	0.15871	31.5369
GOTERM_CC_DIRECT	GO:0044297~cell body	2	0.0850702	0.0473416	CCT4, CCT2	15	63	18224	38.5693	0.952898	0.224788	38.8034
GOTERM_CC_DIRECT	GO:0070062~extracellular exosome	6	0.255211	0.0518278	ARL2, CCT4, TUBB2A, TUBA4A, CCT2, TUBA1A	15	2811	18224	2.59324	0.965014	0.227334	41.6595
GOTERM_BP_DIRECT	GO:0050896~response to stimulus	2	0.0850702	0.0504879	RPGR, PDE6D	15	62	16792	36.1118	0.981484	0.209157	42.1082
GOTERM_CC_DIRECT	GO:0042995~cell projection	2	0.0850702	0.0561196	CCT4, PDE6D	15	75	18224	32.3982	0.973711	0.228872	44.2788
GOTERM_MF_DIRECT	GO:0051082~unfolded protein binding	2	0.0850702	0.0874941	CCT4, CCT2	15	110	16881	20.4618	0.9466	0.386346	54.7511
GOTERM_BP_DIRECT	GO:0007062~sister chromatid cohesion	2	0.0850702	0.0825637	MAPRE1, KIF2A	15	103	16792	21.7372	0.998687	0.308315	59.714
Table S5.1.5: PPI Module 5
Category	Term	Count	%	PValue	Genes	List Total	Pop Hits	Pop Total	Fold Enrichment	Bonferroni	Benjamini	FDR
GOTERM_MF_DIRECT	GO:0016307~phosphatidylinositol phosphate kinase activity	3	0.11919	1.33811e-05	PIK3C2G, PIP5K1B, PIP4K2A	15	7	16881	482.314	0.000896136	0.000896136	0.0137232
GOTERM_BP_DIRECT	GO:0006661~phosphatidylinositol biosynthetic process	4	0.158919	1.38553e-05	PIK3C2G, PIP5K1B, SYNJ2, PIP4K2A	15	58	16792	77.2046	0.0023803	0.0023803	0.0169354
GOTERM_BP_DIRECT	GO:0014824~artery smooth muscle contraction	3	0.11919	2.31604e-05	EDNRA, EDN3, HTR2A	15	9	16792	373.156	0.00397571	0.00198984	0.0283074
GOTERM_CC_DIRECT	GO:0005886~plasma membrane	11	0.437028	0.00013895	EDNRA, GNA13, PIK3C2G, ENPP2, GNA12, SYNJ2, LPAR1, PIP4K2A, NTSR2, ADRA1D, HTR2A	15	4121	18224	3.24297	0.00526653	0.00526653	0.125503
GOTERM_BP_DIRECT	GO:0007204~positive regulation of cytosolic calcium ion concentration	4	0.158919	0.000169595	EDNRA, GNA13, LPAR1, ADRA1D	15	134	16792	33.4169	0.0287513	0.00967712	0.207114
GOTERM_BP_DIRECT	GO:0007202~activation of phospholipase C activity	3	0.11919	0.0002074	EDNRA, LPAR1, HTR2A	15	26	16792	129.169	0.0350476	0.00887947	0.253229
GOTERM_BP_DIRECT	GO:0007200~phospholipase C-activating G-protein coupled receptor signaling pathway	3	0.11919	0.00134301	NTSR2, ADRA1D, HTR2A	15	66	16792	50.8848	0.206382	0.0451783	1.62937
GOTERM_MF_DIRECT	GO:0031752~D5 dopamine receptor binding	2	0.0794597	0.00248609	GNA13, GNA12	15	3	16881	750.267	0.15361	0.0800056	2.52067
GOTERM_CC_DIRECT	GO:0005887~integral component of plasma membrane	6	0.238379	0.00309569	EDNRA, ENPP2, LPAR1, NTSR2, ADRA1D, HTR2A	15	1415	18224	5.15166	0.111143	0.0572078	2.76313
GOTERM_BP_DIRECT	GO:0046854~phosphatidylinositol phosphorylation	3	0.11919	0.0027005	PIK3C2G, PIP5K1B, PIP4K2A	15	94	16792	35.7277	0.371937	0.0745906	3.2515
GOTERM_MF_DIRECT	GO:0052811~1-phosphatidylinositol-3-phosphate 4-kinase activity	2	0.0794597	0.00414029	PIP5K1B, PIP4K2A	15	5	16881	450.16	0.242685	0.0884952	4.16596
GOTERM_MF_DIRECT	GO:0016308~1-phosphatidylinositol-4-phosphate 5-kinase activity	2	0.0794597	0.00579195	PIP5K1B, PIP4K2A	15	7	16881	321.543	0.322394	0.0927136	5.78367
GOTERM_BP_DIRECT	GO:0007186~G-protein coupled receptor signaling pathway	5	0.198649	0.00530445	EDNRA, ENPP2, GNA12, LPAR1, ADRA1D	15	899	16792	6.22618	0.599401	0.122506	6.29455
GOTERM_BP_DIRECT	GO:0008360~regulation of cell shape	3	0.11919	0.00588129	GNA13, GNA12, LPAR1	15	140	16792	23.9886	0.637441	0.119109	6.95665
GOTERM_MF_DIRECT	GO:0004871~signal transducer activity	3	0.11919	0.0120191	GNA13, GNA12, PLCB1	15	204	16881	16.55	0.555214	0.149586	11.6637
GOTERM_BP_DIRECT	GO:0001701~in utero embryonic development	3	0.11919	0.0102797	EDNRA, GNA13, GNA12	15	187	16792	17.9594	0.8309	0.179198	11.8657
GOTERM_BP_DIRECT	GO:0030818~negative regulation of cAMP biosynthetic process	2	0.0794597	0.0107883	EDNRA, LPAR1	15	13	16792	172.226	0.845207	0.170197	12.4177
GOTERM_MF_DIRECT	GO:0001965~G-protein alpha-subunit binding	2	0.0794597	0.0156486	LPAR1, HTR2A	15	19	16881	118.463	0.652415	0.161486	14.9359
GOTERM_MF_DIRECT	GO:0031683~G-protein beta/gamma-subunit complex binding	2	0.0794597	0.0164659	GNA13, GNA12	15	20	16881	112.54	0.67123	0.14693	15.6575
GOTERM_BP_DIRECT	GO:0042310~vasoconstriction	2	0.0794597	0.0140859	EDNRA, EDN3	15	17	16792	131.702	0.91284	0.19894	15.9207
GOTERM_BP_DIRECT	GO:0006939~smooth muscle contraction	2	0.0794597	0.0149088	EDNRA, HTR2A	15	18	16792	124.385	0.924499	0.193701	16.7744
GOTERM_CC_DIRECT	GO:0043198~dendritic shaft	2	0.0794597	0.0243129	LPAR1, HTR2A	15	32	18224	75.9333	0.607535	0.26785	19.9437
GOTERM_CC_DIRECT	GO:0005834~heterotrimeric G-protein complex	2	0.0794597	0.0250638	GNA13, GNA12	15	33	18224	73.6323	0.61885	0.214269	20.4987
GOTERM_MF_DIRECT	GO:0004435~phosphatidylinositol phospholipase C activity	2	0.0794597	0.0221692	EDNRA, PLCB1	15	27	16881	83.363	0.777326	0.171183	20.5412
GOTERM_BP_DIRECT	GO:0001569~patterning of blood vessels	2	0.0794597	0.023102	EDNRA, GNA13	15	28	16792	79.9619	0.98205	0.265997	24.8519
GOTERM_BP_DIRECT	GO:0045907~positive regulation of vasoconstriction	2	0.0794597	0.0263615	ADRA1D, HTR2A	15	32	16792	69.9667	0.989898	0.279792	27.8602
GOTERM_CC_DIRECT	GO:0031526~brush border membrane	2	0.0794597	0.0384878	GNA13, GNA12	15	51	18224	47.6444	0.774948	0.25791	29.8615
GOTERM_BP_DIRECT	GO:0007188~adenylate cyclase-modulating G-protein coupled receptor signaling pathway	2	0.0794597	0.0304217	GNA12, ADRA1D	15	37	16792	60.5117	0.995077	0.298302	31.4527
GOTERM_BP_DIRECT	GO:0007193~adenylate cyclase-inhibiting G-protein coupled receptor signaling pathway	2	0.0794597	0.038495	LPAR1, HTR2A	15	47	16792	47.6369	0.998831	0.344264	38.1127
GOTERM_BP_DIRECT	GO:0036092~phosphatidylinositol-3-phosphate biosynthetic process	2	0.0794597	0.0401021	PIK3C2G, SYNJ2	15	49	16792	45.6925	0.999124	0.339064	39.3654
GOTERM_BP_DIRECT	GO:0007266~Rho protein signal transduction	2	0.0794597	0.0409048	GNA13, GNA12	15	50	16792	44.7787	0.999241	0.329068	39.9823
GOTERM_BP_DIRECT	GO:0043406~positive regulation of MAP kinase activity	2	0.0794597	0.0481005	EDN3, HTR2A	15	59	16792	37.948	0.999792	0.359981	45.2607
GOTERM_BP_DIRECT	GO:0007613~memory	2	0.0794597	0.0504879	PLCB1, HTR2A	15	62	16792	36.1118	0.999865	0.359522	46.9155
GOTERM_BP_DIRECT	GO:0008284~positive regulation of cell proliferation	3	0.11919	0.0561105	EDN3, ADRA1D, HTR2A	15	466	16792	7.20687	0.999951	0.376851	50.6329
GOTERM_BP_DIRECT	GO:0030334~regulation of cell migration	2	0.0794597	0.0599821	GNA13, ENPP2	15	74	16792	30.2559	0.999976	0.383443	53.0519
GOTERM_BP_DIRECT	GO:0014066~regulation of phosphatidylinositol 3-kinase signaling	2	0.0794597	0.0631272	PIP5K1B, PIP4K2A	15	78	16792	28.7043	0.999987	0.385927	54.9364
GOTERM_BP_DIRECT	GO:0050731~positive regulation of peptidyl-tyrosine phosphorylation	2	0.0794597	0.0662625	ENPP2, HTR2A	15	82	16792	27.3041	0.999992	0.388198	56.7456
GOTERM_BP_DIRECT	GO:0007165~signal transduction	4	0.158919	0.0676613	EDNRA, GNA13, EDN3, PLCB1	15	1161	16792	3.8569	0.999994	0.382457	57.5311
GOTERM_BP_DIRECT	GO:0006928~movement of cell or subcellular component	2	0.0794597	0.0693881	GNA13, ENPP2	15	86	16792	26.0341	0.999996	0.37857	58.4826
GOTERM_CC_DIRECT	GO:0005829~cytosol	6	0.238379	0.0940032	PIK3C2G, PIP5K1B, SYNJ2, PIP4K2A, PLCB1, HTR2A	15	3315	18224	2.19897	0.976514	0.464858	59.0231
GOTERM_BP_DIRECT	GO:0006874~cellular calcium ion homeostasis	2	0.0794597	0.0748345	EDN3, HTR2A	15	93	16792	24.0746	0.999998	0.390736	61.3572
GOTERM_BP_DIRECT	GO:0030168~platelet activation	2	0.0794597	0.0917596	GNA13, GNA12	15	115	16792	19.469	1	0.446352	69.1646
GOTERM_BP_DIRECT	GO:0006935~chemotaxis	2	0.0794597	0.0970843	PIK3C2G, ENPP2	15	122	16792	18.3519	1	0.454315	71.3031
Table S5.1.6: PPI Module 6
Category	Term	Count	%	PValue	Genes	List Total	Pop Hits	Pop Total	Fold Enrichment	Bonferroni	Benjamini	FDR
GOTERM_CC_DIRECT	GO:0005886~plasma membrane	11	0.549451	3.03091e-06	ADCY1, PTGER3, PDE2A, ADCY7, GNAI1, ERBB3, RGS4, CNR1, ADRA2A, NPY5R, RGS14	12	4121	18224	4.05371	0.000121229	0.000121229	0.00277296
GOTERM_BP_DIRECT	GO:0019933~cAMP-mediated signaling	3	0.14985	0.000270758	ADCY1, PDE2A, ADCY7	12	38	16792	110.474	0.0498925	0.0498925	0.335702
GOTERM_BP_DIRECT	GO:0007193~adenylate cyclase-inhibiting G-protein coupled receptor signaling pathway	3	0.14985	0.000415006	ADCY1, ADCY7, GNAI1	12	47	16792	89.3191	0.0754539	0.0384668	0.514126
GOTERM_BP_DIRECT	GO:0007189~adenylate cyclase-activating G-protein coupled receptor signaling pathway	3	0.14985	0.000469785	ADCY1, PTGER3, ADCY7	12	50	16792	83.96	0.0849808	0.0291695	0.581807
GOTERM_CC_DIRECT	GO:0005887~integral component of plasma membrane	6	0.2997	0.000870028	ADCY1, PTGER3, ERBB3, CNR1, ADRA2A, NPY5R	12	1415	18224	6.43958	0.0342172	0.0172575	0.793176
GOTERM_BP_DIRECT	GO:0031622~positive regulation of fever generation	2	0.0999001	0.00327147	PTGER3, CNR1	12	5	16792	559.733	0.46169	0.14344	3.98743
GOTERM_CC_DIRECT	GO:0045121~membrane raft	3	0.14985	0.0065395	ADCY1, GNAI1, CNR1	12	206	18224	22.1165	0.230827	0.0837625	5.82605
GOTERM_BP_DIRECT	GO:1904322~cellular response to forskolin	2	0.0999001	0.00522968	ADCY1, GNAI1	12	8	16792	349.833	0.628796	0.179795	6.3037
GOTERM_MF_DIRECT	GO:0016849~phosphorus-oxygen lyase activity	2	0.0999001	0.00779401	ADCY1, ADCY7	12	12	16881	234.458	0.374668	0.374668	7.54193
GOTERM_MF_DIRECT	GO:0032794~GTPase activating protein binding	2	0.0999001	0.00908763	GNAI1, RGS14	12	14	16881	200.964	0.421751	0.239573	8.74291
GOTERM_BP_DIRECT	GO:0009190~cyclic nucleotide biosynthetic process	2	0.0999001	0.00783518	ADCY1, ADCY7	12	12	16792	233.222	0.773878	0.219469	9.30599
GOTERM_BP_DIRECT	GO:0030818~negative regulation of cAMP biosynthetic process	2	0.0999001	0.00848559	PDE2A, ADRA2A	12	13	16792	215.282	0.800236	0.205537	10.0415
GOTERM_MF_DIRECT	GO:0004016~adenylate cyclase activity	2	0.0999001	0.012315	ADCY1, ADCY7	12	19	16881	148.079	0.524546	0.219506	11.6782
GOTERM_MF_DIRECT	GO:0001965~G-protein alpha-subunit binding	2	0.0999001	0.012315	RGS4, RGS14	12	19	16881	148.079	0.524546	0.219506	11.6782
GOTERM_BP_DIRECT	GO:0006171~cAMP biosynthetic process	2	0.0999001	0.0110833	ADCY1, ADCY7	12	17	16792	164.627	0.87833	0.231493	12.9249
GOTERM_BP_DIRECT	GO:0034199~activation of protein kinase A activity	2	0.0999001	0.0117318	ADCY1, ADCY7	12	18	16792	155.481	0.892517	0.219503	13.6313
GOTERM_CC_DIRECT	GO:0005737~cytoplasm	8	0.3996	0.0166522	ADCY1, PDE2A, GNAI1, RGS4, ADRA2A, GMPR, NPY5R, RGS14	12	5222	18224	2.32657	0.48916	0.154582	14.2415
GOTERM_BP_DIRECT	GO:0060135~maternal process involved in female pregnancy	2	0.0999001	0.0162603	ADCY7, CNR1	12	25	16792	111.947	0.954881	0.26644	18.4192
GOTERM_BP_DIRECT	GO:0007616~long-term memory	2	0.0999001	0.0181953	ADCY1, RGS14	12	28	16792	99.9524	0.968901	0.270581	20.3896
GOTERM_BP_DIRECT	GO:0007186~G-protein coupled receptor signaling pathway	4	0.1998	0.0182629	PTGER3, GNAI1, ADRA2A, NPY5R	12	899	16792	6.22618	0.969303	0.25196	20.4577
GOTERM_BP_DIRECT	GO:0003091~renal water homeostasis	2	0.0999001	0.0207699	ADCY1, ADCY7	12	32	16792	87.4583	0.981067	0.262981	22.9436
GOTERM_BP_DIRECT	GO:0007188~adenylate cyclase-modulating G-protein coupled receptor signaling pathway	2	0.0999001	0.0239795	GNAI1, CNR1	12	37	16792	75.6396	0.98982	0.279398	26.0219
GOTERM_BP_DIRECT	GO:0008277~regulation of G-protein coupled receptor protein signaling pathway	2	0.0999001	0.0252607	RGS4, RGS14	12	39	16792	71.7607	0.992058	0.275573	27.2188
GOTERM_BP_DIRECT	GO:0007190~activation of adenylate cyclase activity	2	0.0999001	0.0259007	ADCY1, ADCY7	12	40	16792	69.9667	0.992985	0.266541	27.81
GOTERM_BP_DIRECT	GO:0071377~cellular response to glucagon stimulus	2	0.0999001	0.0259007	ADCY1, ADCY7	12	40	16792	69.9667	0.992985	0.266541	27.81
GOTERM_BP_DIRECT	GO:0035556~intracellular signal transduction	3	0.14985	0.0273832	ADCY1, ADCY7, RGS14	12	403	16792	10.4169	0.99474	0.265586	29.1625
GOTERM_CC_DIRECT	GO:0005622~intracellular	4	0.1998	0.0412529	ADCY1, ADCY7, ERBB3, RGS14	12	1332	18224	4.56056	0.814578	0.286108	31.9842
GOTERM_MF_DIRECT	GO:0008144~drug binding	2	0.0999001	0.0484373	PDE2A, CNR1	12	76	16881	37.0197	0.949155	0.525145	39.1995
GOTERM_BP_DIRECT	GO:0050796~regulation of insulin secretion	2	0.0999001	0.0430373	CNR1, ADRA2A	12	67	16792	41.7711	0.999755	0.369917	42.0894
GOTERM_BP_DIRECT	GO:0043547~positive regulation of GTPase activity	3	0.14985	0.0508347	ERBB3, RGS4, RGS14	12	565	16792	7.43009	0.999948	0.404871	47.6838
GOTERM_CC_DIRECT	GO:0043235~receptor complex	2	0.0999001	0.0740608	ERBB3, ADRA2A	12	127	18224	23.916	0.953943	0.40129	50.5391
GOTERM_BP_DIRECT	GO:0042593~glucose homeostasis	2	0.0999001	0.0642267	CNR1, ADRA2A	12	101	16792	27.7096	0.999996	0.465974	56.1466
GOTERM_MF_DIRECT	GO:0042803~protein homodimerization activity	3	0.14985	0.079309	PDE2A, ERBB3, ADRA2A	12	730	16881	5.78116	0.992972	0.629006	56.312
Table S5.1.7: PPI Module 7
Category	Term	Count	%	PValue	Genes	List Total	Pop Hits	Pop Total	Fold Enrichment	Bonferroni	Benjamini	FDR
GOTERM_BP_DIRECT	GO:0030198~extracellular matrix organization	8	0.401405	3.08924e-12	VWF, PTK2, ITGB8, ITGAV, ITGA8, ITGB4, ITGB1, SPP1	11	196	16792	62.308	6.5182e-10	6.5182e-10	3.90592e-09
GOTERM_BP_DIRECT	GO:0007229~integrin-mediated signaling pathway	7	0.351229	7.42134e-12	PTK2, ITGB8, ITGB1BP1, ITGAV, ITGA8, ITGB4, ITGB1	11	99	16792	107.938	1.56589e-09	7.82946e-10	9.38332e-09
GOTERM_CC_DIRECT	GO:0008305~integrin complex	5	0.250878	7.97339e-10	ITGB8, ITGAV, ITGA8, ITGB4, ITGB1	11	27	18224	306.801	5.98004e-08	5.98004e-08	8.36811e-07
GOTERM_BP_DIRECT	GO:0007160~cell-matrix adhesion	6	0.301054	9.75213e-10	ITGB8, ITGB1BP1, ITGAV, ITGA8, ITGB4, ITGB1	11	90	16792	101.77	2.0577e-07	6.85899e-08	1.23304e-06
GOTERM_CC_DIRECT	GO:0005925~focal adhesion	7	0.351229	1.83356e-08	PTK2, ITGB1BP1, ITGAV, ITGA8, TGM2, FLNB, ITGB1	11	391	18224	29.6601	1.37517e-06	6.87586e-07	1.92433e-05
GOTERM_BP_DIRECT	GO:0007155~cell adhesion	6	0.301054	3.35954e-06	VWF, ITGB8, ITGAV, ITGA8, ITGB4, SPP1	11	459	16792	19.9548	0.000708613	0.0001772	0.00424765
GOTERM_CC_DIRECT	GO:0070062~extracellular exosome	9	0.451581	1.06577e-05	VWF, ITGB8, ITGB1BP1, ITGAV, TGM2, ITGB4, FLNB, ITGB1, SPP1	11	2811	18224	5.30436	0.000799015	0.000266409	0.0111848
GOTERM_BP_DIRECT	GO:0048333~mesodermal cell differentiation	3	0.150527	1.75059e-05	ITGA8, ITGB4, ITGB1	11	11	16792	416.331	0.00368696	0.000738483	0.0221318
GOTERM_BP_DIRECT	GO:0031589~cell-substrate adhesion	3	0.150527	4.32049e-05	VWF, ITGAV, ITGB1	11	17	16792	269.39	0.009075	0.00151825	0.0546136
GOTERM_CC_DIRECT	GO:0009986~cell surface	5	0.250878	0.000140873	ITGB8, ITGAV, ITGA8, ITGB4, ITGB1	11	542	18224	15.2835	0.0105106	0.00263806	0.147747
GOTERM_CC_DIRECT	GO:0005886~plasma membrane	9	0.451581	0.000195683	PTK2, ITGB8, ITGB1BP1, ITGAV, ITGA8, TGM2, ITGB4, FLNB, ITGB1	11	4121	18224	3.61819	0.0145704	0.00293122	0.205179
GOTERM_CC_DIRECT	GO:0034686~integrin alphav-beta8 complex	2	0.100351	0.00109718	ITGB8, ITGAV	11	2	18224	1656.73	0.0790356	0.0136286	1.14552
GOTERM_MF_DIRECT	GO:0002020~protease binding	3	0.150527	0.00154587	VWF, ITGAV, ITGB1	11	101	16881	45.5833	0.0744372	0.0744372	1.479
GOTERM_MF_DIRECT	GO:0005178~integrin binding	3	0.150527	0.00166926	VWF, ITGB1BP1, ITGB1	11	105	16881	43.8468	0.0801391	0.0409062	1.5962
GOTERM_CC_DIRECT	GO:0034678~integrin alpha8-beta1 complex	2	0.100351	0.00164537	ITGA8, ITGB1	11	3	18224	1104.48	0.116182	0.0174887	1.71339
GOTERM_MF_DIRECT	GO:1990430~extracellular matrix protein binding	2	0.100351	0.00236763	ITGB8, ITGAV	11	4	16881	767.318	0.111768	0.0387371	2.25721
GOTERM_BP_DIRECT	GO:0008284~positive regulation of cell proliferation	4	0.200702	0.0022031	PTK2, ITGB1BP1, ITGAV, ITGB1	11	466	16792	13.1034	0.372096	0.0643194	2.75011
GOTERM_MF_DIRECT	GO:0019960~C-X3-C chemokine binding	2	0.100351	0.00295875	ITGAV, ITGB1	11	5	16881	613.855	0.137704	0.0363617	2.81358
GOTERM_MF_DIRECT	GO:0038132~neuregulin binding	2	0.100351	0.00295875	ITGAV, ITGB4	11	5	16881	613.855	0.137704	0.0363617	2.81358
GOTERM_CC_DIRECT	GO:0030027~lamellipodium	3	0.150527	0.00329134	PTK2, ITGB1BP1, ITGB1	11	160	18224	31.0636	0.21906	0.0304345	3.4008
GOTERM_BP_DIRECT	GO:0016477~cell migration	3	0.150527	0.00444727	ITGB1BP1, ITGAV, ITGB1	11	172	16792	26.6258	0.609554	0.110911	5.47972
GOTERM_MF_DIRECT	GO:0004872~receptor activity	3	0.150527	0.00691565	ITGB8, ITGB4, ITGB1	11	217	16881	21.2162	0.293183	0.0670436	6.46541
GOTERM_MF_DIRECT	GO:0031994~insulin-like growth factor I binding	2	0.100351	0.00708777	ITGAV, ITGB4	11	12	16881	255.773	0.299282	0.0575525	6.62143
GOTERM_BP_DIRECT	GO:0033628~regulation of cell adhesion mediated by integrin	2	0.100351	0.00653321	PTK2, ITGB1BP1	11	11	16792	277.554	0.749182	0.142445	7.95343
GOTERM_MF_DIRECT	GO:0003779~actin binding	3	0.150527	0.0111446	PTK2, FLNB, ITGB1	11	278	16881	16.5608	0.428995	0.0769308	10.2319
GOTERM_BP_DIRECT	GO:0033627~cell adhesion mediated by integrin	2	0.100351	0.00889938	ITGAV, ITGB1	11	15	16792	203.539	0.848349	0.171897	10.6872
GOTERM_BP_DIRECT	GO:0043277~apoptotic cell clearance	2	0.100351	0.00889938	ITGAV, TGM2	11	15	16792	203.539	0.848349	0.171897	10.6872
GOTERM_CC_DIRECT	GO:0031012~extracellular matrix	3	0.150527	0.0108559	VWF, TGM2, FLNB	11	296	18224	16.7912	0.55897	0.0869459	10.8238
GOTERM_BP_DIRECT	GO:2000811~negative regulation of anoikis	2	0.100351	0.0100806	PTK2, ITGB1	11	17	16792	179.594	0.882085	0.176626	12.0237
GOTERM_MF_DIRECT	GO:0001968~fibronectin binding	2	0.100351	0.0152997	ITGAV, ITGB1	11	26	16881	118.049	0.537402	0.0918648	13.7997
GOTERM_MF_DIRECT	GO:0050840~extracellular matrix binding	2	0.100351	0.0152997	ITGAV, SPP1	11	26	16881	118.049	0.537402	0.0918648	13.7997
GOTERM_BP_DIRECT	GO:0034113~heterotypic cell-cell adhesion	2	0.100351	0.013028	ITGAV, ITGB1	11	22	16792	138.777	0.937148	0.205928	15.2789
GOTERM_MF_DIRECT	GO:0015026~coreceptor activity	2	0.100351	0.0176347	ITGAV, ITGB1	11	30	16881	102.309	0.58918	0.0941165	15.7484
GOTERM_BP_DIRECT	GO:0048870~cell motility	2	0.100351	0.0142047	PTK2, ITGB4	11	24	16792	127.212	0.951135	0.207218	16.5472
GOTERM_BP_DIRECT	GO:0031214~biomineral tissue development	2	0.100351	0.0147926	ITGB1BP1, SPP1	11	25	16792	122.124	0.956914	0.201173	17.1743
GOTERM_BP_DIRECT	GO:0034446~substrate adhesion-dependent cell spreading	2	0.100351	0.0224067	ITGAV, ITGA8	11	38	16792	80.3445	0.991617	0.272959	24.9134
GOTERM_CC_DIRECT	GO:0001725~stress fiber	2	0.100351	0.0292464	PTK2, FLNB	11	54	18224	61.3603	0.892062	0.199581	26.7667
GOTERM_BP_DIRECT	GO:0045785~positive regulation of cell adhesion	2	0.100351	0.0253211	ITGAV, TGM2	11	43	16792	71.0021	0.995535	0.286963	27.695
GOTERM_MF_DIRECT	GO:0001618~virus receptor activity	2	0.100351	0.0407121	ITGAV, ITGB1	11	70	16881	43.8468	0.874845	0.187647	32.9895
GOTERM_CC_DIRECT	GO:0048471~perinuclear region of cytoplasm	3	0.150527	0.0435168	ITGB1BP1, ITGB1, SPP1	11	621	18224	8.00351	0.964453	0.261663	37.3086
GOTERM_CC_DIRECT	GO:0032587~ruffle membrane	2	0.100351	0.0441061	ITGAV, ITGB1	11	82	18224	40.408	0.966059	0.245671	37.7128
GOTERM_BP_DIRECT	GO:0009611~response to wounding	2	0.100351	0.0369005	VWF, ITGB4	11	63	16792	48.4618	0.999641	0.372909	37.8356
GOTERM_BP_DIRECT	GO:0043087~regulation of GTPase activity	2	0.100351	0.0380516	PTK2, ITGB1BP1	11	65	16792	46.9706	0.999721	0.365398	38.7685
GOTERM_CC_DIRECT	GO:0001726~ruffle	2	0.100351	0.0483139	ITGB1BP1, ITGB1	11	90	18224	36.8162	0.97562	0.248506	40.531
GOTERM_BP_DIRECT	GO:0048010~vascular endothelial growth factor receptor signaling pathway	2	0.100351	0.0420707	PTK2, ITGAV	11	72	16792	42.404	0.999885	0.379555	41.9257
GOTERM_BP_DIRECT	GO:0046718~viral entry into host cell	2	0.100351	0.0466455	ITGAV, ITGB1	11	80	16792	38.1636	0.999958	0.395865	45.3365
GOTERM_BP_DIRECT	GO:0051897~positive regulation of protein kinase B signaling	2	0.100351	0.0489255	PTK2, ITGB1BP1	11	84	16792	36.3463	0.999975	0.395901	46.9666
GOTERM_BP_DIRECT	GO:0007179~transforming growth factor beta receptor signaling pathway	2	0.100351	0.0534707	PTK2, ITGB1	11	92	16792	33.1858	0.999991	0.409658	50.0835
GOTERM_MF_DIRECT	GO:0005515~protein binding	9	0.451581	0.0705056	VWF, PTK2, ITGB1BP1, ITGAV, TGM2, ITGB4, FLNB, ITGB1, SPP1	11	8785	16881	1.57219	0.974157	0.282756	50.5494
GOTERM_CC_DIRECT	GO:0005938~cell cortex	2	0.100351	0.0654957	PTK2, FLNB	11	123	18224	26.9387	0.993783	0.304335	50.881
GOTERM_CC_DIRECT	GO:0043235~receptor complex	2	0.100351	0.0675592	ITGB4, ITGB1	11	127	18224	26.0902	0.994733	0.295134	52.0074
GOTERM_CC_DIRECT	GO:0005783~endoplasmic reticulum	3	0.150527	0.0728365	VWF, ITGA8, TGM2	11	828	18224	6.00264	0.996559	0.298472	54.7827
GOTERM_BP_DIRECT	GO:0050900~leukocyte migration	2	0.100351	0.070342	ITGAV, ITGB1	11	122	16792	25.0253	1	0.487847	60.2364
Table S5.1.8: PPI Module 8
Category	Term	Count	%	PValue	Genes	List Total	Pop Hits	Pop Total	Fold Enrichment	Bonferroni	Benjamini	FDR
GOTERM_MF_DIRECT	GO:0016303~1-phosphatidylinositol-3-kinase activity	6	0.354191	1.05439e-11	FGFR2, FGFR1, FGFR3, FGF9, FGF1, FGF2	10	43	16881	235.549	3.26861e-10	3.26861e-10	9.05811e-09
GOTERM_BP_DIRECT	GO:0036092~phosphatidylinositol-3-phosphate biosynthetic process	6	0.354191	2.14202e-11	FGFR2, FGFR1, FGFR3, FGF9, FGF1, FGF2	10	49	16792	205.616	5.33363e-09	5.33363e-09	2.78093e-08
GOTERM_MF_DIRECT	GO:0046934~phosphatidylinositol-4,5-bisphosphate 3-kinase activity	6	0.354191	7.06144e-11	FGFR2, FGFR1, FGFR3, FGF9, FGF1, FGF2	10	62	16881	163.365	2.18905e-09	1.09452e-09	6.06638e-08
GOTERM_BP_DIRECT	GO:0014066~regulation of phosphatidylinositol 3-kinase signaling	6	0.354191	2.35778e-10	FGFR2, FGFR1, FGFR3, FGF9, FGF1, FGF2	10	78	16792	129.169	5.87087e-08	2.93543e-08	3.06105e-07
GOTERM_BP_DIRECT	GO:0008543~fibroblast growth factor receptor signaling pathway	6	0.354191	3.04492e-10	FGFR2, FGFR1, FGFR3, FGF9, FGF1, FGF2	10	82	16792	122.868	7.58184e-08	2.52728e-08	3.95314e-07
GOTERM_BP_DIRECT	GO:0046854~phosphatidylinositol phosphorylation	6	0.354191	6.11095e-10	FGFR2, FGFR1, FGFR3, FGF9, FGF1, FGF2	10	94	16792	107.183	1.52163e-07	3.80406e-08	7.9337e-07
GOTERM_MF_DIRECT	GO:0005088~Ras guanyl-nucleotide exchange factor activity	6	0.354191	1.65729e-09	FGFR2, FGFR1, FGFR3, FGF9, FGF1, FGF2	10	115	16881	88.0748	5.1376e-08	1.71253e-08	1.42375e-06
GOTERM_BP_DIRECT	GO:0048015~phosphatidylinositol-mediated signaling	6	0.354191	1.12552e-09	FGFR2, FGFR1, FGFR3, FGF9, FGF1, FGF2	10	106	16792	95.0491	2.80254e-07	5.60508e-08	1.46123e-06
GOTERM_MF_DIRECT	GO:0004713~protein tyrosine kinase activity	6	0.354191	3.45823e-09	FGFR2, FGFR1, FGFR3, FGF9, FGF1, FGF2	10	133	16881	76.1549	1.07205e-07	2.68013e-08	2.97092e-06
GOTERM_BP_DIRECT	GO:0018108~peptidyl-tyrosine phosphorylation	6	0.354191	7.19614e-09	FGFR2, FGFR1, FGFR3, FGF9, FGF1, FGF2	10	153	16792	65.851	1.79184e-06	2.9864e-07	9.34258e-06
GOTERM_BP_DIRECT	GO:0043410~positive regulation of MAPK cascade	5	0.295159	6.21487e-08	FGFR2, FGFR1, FGFR3, BNIP2, FGF9	10	81	16792	103.654	1.54749e-05	2.21072e-06	8.06862e-05
GOTERM_BP_DIRECT	GO:0000165~MAPK cascade	6	0.354191	1.06575e-07	FGFR2, FGFR1, FGFR3, FGF9, FGF1, FGF2	10	262	16792	38.455	2.65369e-05	3.31716e-06	0.000138364
GOTERM_BP_DIRECT	GO:0043547~positive regulation of GTPase activity	7	0.413223	1.0891e-07	FGFR2, FGFR1, FGFR3, BNIP2, FGF9, FGF1, FGF2	10	565	16792	20.8042	2.71181e-05	3.01316e-06	0.000141395
GOTERM_BP_DIRECT	GO:0060045~positive regulation of cardiac muscle cell proliferation	4	0.236128	1.63121e-07	FGFR2, FGFR1, FGF9, FGF2	10	22	16792	305.309	4.06162e-05	4.0617e-06	0.000211776
GOTERM_MF_DIRECT	GO:0008201~heparin binding	5	0.295159	9.43838e-07	FGFR2, FGFR1, FGF9, FGF1, FGF2	10	160	16881	52.7531	2.92586e-05	5.85178e-06	0.000810834
GOTERM_MF_DIRECT	GO:0005007~fibroblast growth factor-activated receptor activity	3	0.177096	2.52465e-06	FGFR2, FGFR1, FGFR3	10	5	16881	1012.86	7.82613e-05	1.3044e-05	0.00216887
GOTERM_BP_DIRECT	GO:0051781~positive regulation of cell division	4	0.236128	1.70605e-06	FGFR2, FGF9, FGF1, FGF2	10	47	16792	142.911	0.000424717	3.86181e-05	0.0022149
GOTERM_BP_DIRECT	GO:0008284~positive regulation of cell proliferation	6	0.354191	1.85148e-06	FGFR2, FGFR1, FGFR3, FGF9, FGF1, FGF2	10	466	16792	21.6206	0.000460911	3.84174e-05	0.0024037
GOTERM_BP_DIRECT	GO:0010518~positive regulation of phospholipase activity	3	0.177096	7.13817e-06	FGFR2, FGFR1, FGFR3	10	8	16792	629.7	0.00177583	0.000136715	0.00926693
GOTERM_BP_DIRECT	GO:0060484~lung-associated mesenchyme development	3	0.177096	1.14657e-05	FGFR2, FGFR1, FGF9	10	10	16792	503.76	0.0028509	0.000203906	0.0148846
GOTERM_BP_DIRECT	GO:0001759~organ induction	3	0.177096	1.6807e-05	FGFR1, FGF1, FGF2	10	12	16792	419.8	0.00417623	0.00027896	0.0218179
GOTERM_MF_DIRECT	GO:0005104~fibroblast growth factor receptor binding	3	0.177096	5.80459e-05	FGF9, FGF1, FGF2	10	22	16881	230.195	0.00179786	0.000257035	0.0498554
GOTERM_MF_DIRECT	GO:0017134~fibroblast growth factor binding	3	0.177096	6.35565e-05	FGFR2, FGFR1, FGFR3	10	23	16881	220.187	0.00196838	0.000246259	0.0545873
GOTERM_BP_DIRECT	GO:0002053~positive regulation of mesenchymal cell proliferation	3	0.177096	8.24402e-05	FGFR2, FGFR1, FGF9	10	26	16792	193.754	0.0203192	0.00128221	0.106977
GOTERM_BP_DIRECT	GO:0070374~positive regulation of ERK1 and ERK2 cascade	4	0.236128	8.92499e-05	FGFR2, FGFR3, FGF1, FGF2	10	175	16792	38.3817	0.0219791	0.00130645	0.115809
GOTERM_BP_DIRECT	GO:0001657~ureteric bud development	3	0.177096	0.00017773	FGFR2, FGFR1, SDC4	10	38	16792	132.568	0.0432937	0.0024558	0.230498
GOTERM_BP_DIRECT	GO:0001525~angiogenesis	4	0.236128	0.00018298	FGFR2, FGFR1, FGF9, FGF1	10	223	16792	30.1202	0.0445437	0.00239535	0.237298
GOTERM_BP_DIRECT	GO:0002062~chondrocyte differentiation	3	0.177096	0.000187285	FGFR1, FGFR3, FGF9	10	39	16792	129.169	0.0455676	0.00232921	0.242876
GOTERM_BP_DIRECT	GO:0042472~inner ear morphogenesis	3	0.177096	0.000333933	FGFR2, FGFR1, FGF9	10	52	16792	96.8769	0.079799	0.00395232	0.432671
GOTERM_CC_DIRECT	GO:0005576~extracellular region	6	0.354191	0.00049754	FGFR2, FGFR1, FGFR3, FGF9, FGF1, FGF2	10	1610	18224	6.79155	0.020685	0.020685	0.459528
GOTERM_BP_DIRECT	GO:0043406~positive regulation of MAP kinase activity	3	0.177096	0.000430051	FGFR1, FGF1, FGF2	10	59	16792	85.3831	0.101569	0.00485661	0.556889
GOTERM_BP_DIRECT	GO:0050679~positive regulation of epithelial cell proliferation	3	0.177096	0.000444757	FGFR2, FGF9, FGF1	10	60	16792	83.96	0.104855	0.00480447	0.575881
GOTERM_BP_DIRECT	GO:0030324~lung development	3	0.177096	0.000712954	FGFR2, FGF1, FGF2	10	76	16792	66.2842	0.162713	0.00737223	0.921668
GOTERM_BP_DIRECT	GO:0035607~fibroblast growth factor receptor signaling pathway involved in orbitofrontal cortex development	2	0.118064	0.00107168	FGFR2, FGFR1	10	2	16792	1679.2	0.234321	0.0106229	1.38244
GOTERM_CC_DIRECT	GO:0009986~cell surface	4	0.236128	0.00192206	FGFR2, FGFR3, SDC4, SDC2	10	542	18224	13.4494	0.0776256	0.0395968	1.76481
GOTERM_BP_DIRECT	GO:2000544~regulation of endothelial cell chemotaxis to fibroblast growth factor	2	0.118064	0.00160714	FGF1, FGF2	10	3	16792	1119.47	0.330015	0.0152858	2.06654
GOTERM_BP_DIRECT	GO:0021847~ventricular zone neuroblast division	2	0.118064	0.00160714	FGFR2, FGFR1	10	3	16792	1119.47	0.330015	0.0152858	2.06654
GOTERM_BP_DIRECT	GO:0090263~positive regulation of canonical Wnt signaling pathway	3	0.177096	0.0017644	FGFR2, FGF9, FGF2	10	120	16792	41.98	0.355786	0.0161542	2.26662
GOTERM_MF_DIRECT	GO:0008083~growth factor activity	3	0.177096	0.00315242	FGF9, FGF1, FGF2	10	162	16881	31.2611	0.0932417	0.0108166	2.67602
GOTERM_BP_DIRECT	GO:2000546~positive regulation of endothelial cell chemotaxis to fibroblast growth factor	2	0.118064	0.00214235	FGFR1, FGF2	10	4	16792	839.6	0.413754	0.0188913	2.74594
GOTERM_BP_DIRECT	GO:1903672~positive regulation of sprouting angiogenesis	2	0.118064	0.00321199	FGF1, FGF2	10	6	16792	559.733	0.551153	0.0272452	4.09074
GOTERM_BP_DIRECT	GO:0046777~protein autophosphorylation	3	0.177096	0.00358185	FGFR2, FGFR1, FGFR3	10	172	16792	29.2884	0.590772	0.0293436	4.55174
GOTERM_BP_DIRECT	GO:0016477~cell migration	3	0.177096	0.00358185	FGFR1, SDC4, SDC2	10	172	16792	29.2884	0.590772	0.0293436	4.55174
GOTERM_BP_DIRECT	GO:0048762~mesenchymal cell differentiation	2	0.118064	0.00428061	FGFR2, FGFR1	10	8	16792	419.8	0.65636	0.0338699	5.4171
GOTERM_BP_DIRECT	GO:0010863~positive regulation of phospholipase C activity	2	0.118064	0.00481454	FGFR1, FGF2	10	9	16792	373.156	0.699322	0.0368572	6.07344
GOTERM_BP_DIRECT	GO:0061045~negative regulation of wound healing	2	0.118064	0.00588164	CASK, FGF2	10	11	16792	305.309	0.76981	0.0435346	7.37262
GOTERM_BP_DIRECT	GO:0060445~branching involved in salivary gland morphogenesis	2	0.118064	0.00588164	FGFR2, FGFR1	10	11	16792	305.309	0.76981	0.0435346	7.37262
GOTERM_BP_DIRECT	GO:0007267~cell-cell signaling	3	0.177096	0.00764925	FGFR2, FGFR3, FGF9	10	254	16792	19.8331	0.852213	0.0546829	9.48822
GOTERM_CC_DIRECT	GO:0005925~focal adhesion	3	0.177096	0.0149602	FGFR3, CASK, SDC4	10	391	18224	13.9826	0.469044	0.190246	13.0209
GOTERM_BP_DIRECT	GO:0045944~positive regulation of transcription from RNA polymerase II promoter	4	0.236128	0.0128005	FGFR2, CASK, FGF1, FGF2	10	981	16792	6.84689	0.959558	0.0875793	15.4019
GOTERM_BP_DIRECT	GO:0006027~glycosaminoglycan catabolic process	2	0.118064	0.0138525	SDC4, SDC2	10	26	16792	129.169	0.968988	0.0919746	16.5649
GOTERM_BP_DIRECT	GO:0060349~bone morphogenesis	2	0.118064	0.0143819	FGFR2, FGFR3	10	27	16792	124.385	0.972869	0.0928874	17.1445
GOTERM_BP_DIRECT	GO:0030203~glycosaminoglycan metabolic process	2	0.118064	0.0154398	SDC4, SDC2	10	29	16792	115.807	0.979235	0.0969349	18.2918
GOTERM_BP_DIRECT	GO:0030901~midbrain development	2	0.118064	0.0164968	FGFR2, FGFR1	10	31	16792	108.335	0.984108	0.100759	19.4233
GOTERM_BP_DIRECT	GO:0043552~positive regulation of phosphatidylinositol 3-kinase activity	2	0.118064	0.0164968	FGFR3, FGF2	10	31	16792	108.335	0.984108	0.100759	19.4233
GOTERM_BP_DIRECT	GO:0048705~skeletal system morphogenesis	2	0.118064	0.0170249	FGFR2, FGFR1	10	32	16792	104.95	0.986098	0.101378	19.9832
GOTERM_MF_DIRECT	GO:0005515~protein binding	9	0.531287	0.0259897	FGFR2, FGFR1, FGFR3, BNIP2, CASK, SDC4, FGF1, FGF2, SDC2	10	8785	16881	1.72941	0.557951	0.0783903	20.2462
GOTERM_BP_DIRECT	GO:0030282~bone mineralization	2	0.118064	0.0180803	FGFR2, FGFR3	10	34	16792	98.7765	0.989361	0.104891	21.0915
GOTERM_BP_DIRECT	GO:0045787~positive regulation of cell cycle	2	0.118064	0.0180803	FGFR2, FGFR1	10	34	16792	98.7765	0.989361	0.104891	21.0915
GOTERM_CC_DIRECT	GO:0005887~integral component of plasma membrane	4	0.236128	0.0275047	FGFR2, FGFR1, FGFR3, SDC4	10	1415	18224	5.15166	0.690062	0.253863	22.7499
GOTERM_BP_DIRECT	GO:0007165~signal transduction	4	0.236128	0.0201981	FGF9, SDC4, FGF1, FGF2	10	1161	16792	5.78536	0.993785	0.113941	23.2726
GOTERM_BP_DIRECT	GO:0030326~embryonic limb morphogenesis	2	0.118064	0.0212406	FGFR1, FGF9	10	40	16792	83.96	0.995232	0.116906	24.3258
GOTERM_BP_DIRECT	GO:0006024~glycosaminoglycan biosynthetic process	2	0.118064	0.0222921	SDC4, SDC2	10	42	16792	79.9619	0.996352	0.119777	25.3745
GOTERM_CC_DIRECT	GO:0005886~plasma membrane	6	0.354191	0.0325907	FGFR2, FGFR1, FGFR3, CASK, SDC4, SDC2	10	4121	18224	2.65334	0.751325	0.242947	26.4092
GOTERM_BP_DIRECT	GO:0010595~positive regulation of endothelial cell migration	2	0.118064	0.0243919	FGF1, FGF2	10	46	16792	73.0087	0.997864	0.127717	27.4287
GOTERM_MF_DIRECT	GO:0005524~ATP binding	4	0.236128	0.0387857	FGFR2, FGFR1, FGFR3, CASK	10	1495	16881	4.51666	0.706622	0.105492	28.8113
GOTERM_BP_DIRECT	GO:0021762~substantia nigra development	2	0.118064	0.0259642	FGF9, FGF2	10	49	16792	68.5388	0.998571	0.132727	28.9325
GOTERM_CC_DIRECT	GO:0005604~basement membrane	2	0.118064	0.0383531	FGF9, CASK	10	79	18224	46.1367	0.80651	0.239482	30.3678
GOTERM_CC_DIRECT	GO:0043202~lysosomal lumen	2	0.118064	0.0412118	SDC4, SDC2	10	85	18224	42.88	0.829253	0.223152	32.2602
GOTERM_BP_DIRECT	GO:0048661~positive regulation of smooth muscle cell proliferation	2	0.118064	0.0317098	FGFR2, FGF2	10	60	16792	55.9733	0.999672	0.156939	34.1868
GOTERM_BP_DIRECT	GO:0001523~retinoid metabolic process	2	0.118064	0.0322306	SDC4, SDC2	10	61	16792	55.0557	0.999713	0.156293	34.6449
GOTERM_CC_DIRECT	GO:0005796~Golgi lumen	2	0.118064	0.0464332	SDC4, SDC2	10	96	18224	37.9667	0.864248	0.2209	35.5986
GOTERM_BP_DIRECT	GO:0045666~positive regulation of neuron differentiation	2	0.118064	0.0410468	FGFR1, BNIP2	10	78	16792	43.0564	0.999971	0.191833	41.9663
GOTERM_BP_DIRECT	GO:0042060~wound healing	2	0.118064	0.0420793	SDC4, FGF2	10	80	16792	41.98	0.999978	0.192726	42.7723
GOTERM_CC_DIRECT	GO:0005938~cell cortex	2	0.118064	0.0591423	FGFR2, FGF1	10	123	18224	29.6325	0.922731	0.247607	43.1194
GOTERM_CC_DIRECT	GO:0016023~cytoplasmic, membrane-bounded vesicle	2	0.118064	0.0661377	FGFR2, FGFR1	10	138	18224	26.4116	0.943522	0.249781	46.9155
GOTERM_BP_DIRECT	GO:0009887~organ morphogenesis	2	0.118064	0.0482535	FGFR2, FGF2	10	92	16792	36.5043	0.999996	0.214523	47.3805
GOTERM_BP_DIRECT	GO:0000122~negative regulation of transcription from RNA polymerase II promoter	3	0.177096	0.0541048	FGFR2, FGFR1, FGF9	10	720	16792	6.99667	0.999999	0.23383	51.4291
GOTERM_BP_DIRECT	GO:0000187~activation of MAPK activity	2	0.118064	0.0559215	FGF1, FGF2	10	107	16792	31.3869	0.999999	0.236893	52.6264
GOTERM_CC_DIRECT	GO:0016021~integral component of membrane	6	0.354191	0.0795993	FGFR2, FGFR1, FGFR3, BNIP2, SDC4, SDC2	10	5163	18224	2.11784	0.969308	0.271453	53.5905
GOTERM_BP_DIRECT	GO:0045766~positive regulation of angiogenesis	2	0.118064	0.0599886	FGF1, FGF2	10	115	16792	29.2035	1	0.24818	55.2087
GOTERM_BP_DIRECT	GO:0001501~skeletal system development	2	0.118064	0.071093	FGFR1, FGFR3	10	137	16792	24.5139	1	0.283854	61.6124
GOTERM_BP_DIRECT	GO:0001701~in utero embryonic development	2	0.118064	0.0958976	FGFR2, FGFR1	10	187	16792	17.9594	1	0.361259	72.9863
Table S5.1.9: PPI Module 9
Category	Term	Count	%	PValue	Genes	List Total	Pop Hits	Pop Total	Fold Enrichment	Bonferroni	Benjamini	FDR
GOTERM_BP_DIRECT	GO:0030501~positive regulation of bone mineralization	5	0.310752	1.10024e-09	BMP4, ACVR2A, TGFB3, SMAD3, BMPR1B	9	35	16792	266.54	4.46696e-07	4.46696e-07	1.53794e-06
GOTERM_BP_DIRECT	GO:0030509~BMP signaling pathway	5	0.310752	2.67487e-08	BMP4, ACVR2A, SMAD5, TGFBR3, BMPR1B	9	76	16792	122.749	1.08599e-05	5.42998e-06	3.73901e-05
GOTERM_BP_DIRECT	GO:0007179~transforming growth factor beta receptor signaling pathway	5	0.310752	5.80773e-08	TGFBR1, SMAD5, TGFB3, SMAD3, TGFBR3	9	92	16792	101.401	2.35791e-05	7.85977e-06	8.1182e-05
GOTERM_CC_DIRECT	GO:0043235~receptor complex	5	0.310752	1.54087e-07	ACVR2A, TGFBR1, SMAD3, TGFBR3, BMPR1B	9	127	18224	79.72	5.39305e-06	5.39305e-06	0.000136485
GOTERM_BP_DIRECT	GO:0010862~positive regulation of pathway-restricted SMAD protein phosphorylation	4	0.248602	1.21531e-06	BMP4, ACVR2A, TGFBR1, TGFB3	9	48	16792	155.481	0.000493294	0.000123346	0.00169878
GOTERM_BP_DIRECT	GO:0045893~positive regulation of transcription, DNA-templated	6	0.372902	1.38079e-06	BMP4, TGFBR1, SMAD5, TGFB3, PAX6, SMAD3	9	515	16792	21.7372	0.000560443	0.000112114	0.00193008
GOTERM_BP_DIRECT	GO:0045669~positive regulation of osteoblast differentiation	4	0.248602	2.39803e-06	BMP4, ACVR2A, SMAD5, BMPR1B	9	60	16792	124.385	0.000973128	0.000162254	0.00335198
GOTERM_BP_DIRECT	GO:0060395~SMAD protein signal transduction	4	0.248602	2.64912e-06	BMP4, SMAD5, TGFB3, SMAD3	9	62	16792	120.373	0.00107497	0.000153637	0.00370295
GOTERM_BP_DIRECT	GO:0030512~negative regulation of transforming growth factor beta receptor signaling pathway	4	0.248602	2.91707e-06	TGFBR1, TGFB3, SMAD3, TGFBR3	9	64	16792	116.611	0.00118363	0.000148031	0.00407748
GOTERM_MF_DIRECT	GO:0005114~type II transforming growth factor beta receptor binding	3	0.186451	4.12213e-06	TGFBR1, TGFB3, TGFBR3	9	7	16881	803.857	0.000284387	0.000284387	0.00425341
GOTERM_MF_DIRECT	GO:0004675~transmembrane receptor protein serine/threonine kinase activity	3	0.186451	7.06317e-06	ACVR2A, TGFBR1, BMPR1B	9	9	16881	625.222	0.000487241	0.00024365	0.00728801
GOTERM_BP_DIRECT	GO:0060391~positive regulation of SMAD protein import into nucleus	3	0.186451	1.54513e-05	BMP4, TGFBR1, TGFB3	9	13	16792	430.564	0.00625364	0.000696788	0.0215961
GOTERM_MF_DIRECT	GO:0050431~transforming growth factor beta binding	3	0.186451	2.35048e-05	TGFBR1, TGFB3, TGFBR3	9	16	16881	351.687	0.00162054	0.000540472	0.0242512
GOTERM_BP_DIRECT	GO:0032924~activin receptor signaling pathway	3	0.186451	2.37543e-05	ACVR2A, TGFBR1, SMAD3	9	16	16792	349.833	0.00959799	0.000963969	0.0331992
GOTERM_BP_DIRECT	GO:0048663~neuron fate commitment	3	0.186451	2.69151e-05	BMP4, TGFBR1, PAX6	9	17	16792	329.255	0.0108682	0.000992931	0.0376161
GOTERM_BP_DIRECT	GO:0045944~positive regulation of transcription from RNA polymerase II promoter	6	0.372902	3.25262e-05	BMP4, ACVR2A, TGFB3, PAX6, SMAD3, BMPR1B	9	981	16792	11.4115	0.0131191	0.00109988	0.0454565
GOTERM_BP_DIRECT	GO:0071773~cellular response to BMP stimulus	3	0.186451	8.58223e-05	BMP4, ACVR2A, BMPR1B	9	30	16792	186.578	0.0342453	0.00267682	0.119898
GOTERM_BP_DIRECT	GO:0048701~embryonic cranial skeleton morphogenesis	3	0.186451	9.17193e-05	BMP4, TGFBR1, SMAD3	9	31	16792	180.559	0.0365549	0.00265645	0.128131
GOTERM_BP_DIRECT	GO:0010718~positive regulation of epithelial to mesenchymal transition	3	0.186451	0.000104096	TGFBR1, TGFB3, SMAD3	9	33	16792	169.616	0.0413845	0.00281372	0.14541
GOTERM_MF_DIRECT	GO:0005160~transforming growth factor beta receptor binding	3	0.186451	0.000167611	BMP4, SMAD3, TGFBR3	9	42	16881	133.976	0.0114995	0.00288735	0.172817
GOTERM_MF_DIRECT	GO:0046332~SMAD binding	3	0.186451	0.000175745	TGFBR1, TGFBR3, BMPR1B	9	43	16881	130.86	0.0120542	0.00242256	0.181197
GOTERM_BP_DIRECT	GO:0001657~ureteric bud development	3	0.186451	0.000138433	BMP4, SMAD5, SMAD3	9	38	16792	147.298	0.054657	0.00350681	0.193331
GOTERM_BP_DIRECT	GO:0051496~positive regulation of stress fiber assembly	3	0.186451	0.000169384	TGFBR1, TGFB3, SMAD3	9	42	16792	133.27	0.0664639	0.00403745	0.236509
GOTERM_BP_DIRECT	GO:0023014~signal transduction by protein phosphorylation	3	0.186451	0.000186017	ACVR2A, TGFBR1, BMPR1B	9	44	16792	127.212	0.072748	0.00418732	0.259706
GOTERM_MF_DIRECT	GO:0004702~receptor signaling protein serine/threonine kinase activity	3	0.186451	0.000267556	ACVR2A, TGFBR1, BMPR1B	9	53	16881	106.17	0.0182944	0.00307258	0.275739
GOTERM_BP_DIRECT	GO:0050680~negative regulation of epithelial cell proliferation	3	0.186451	0.000301953	BMP4, PAX6, TGFBR3	9	56	16792	99.9524	0.115393	0.00643246	0.421253
GOTERM_BP_DIRECT	GO:0060021~palate development	3	0.186451	0.000556151	TGFBR1, TGFB3, TGFBR3	9	76	16792	73.6491	0.20217	0.0112295	0.774603
GOTERM_BP_DIRECT	GO:0042060~wound healing	3	0.186451	0.000616056	TGFBR1, TGFB3, SMAD3	9	80	16792	69.9667	0.221352	0.0118434	0.857706
GOTERM_CC_DIRECT	GO:0009986~cell surface	4	0.248602	0.00131022	ACVR2A, TGFBR1, TGFB3, TGFBR3	9	542	18224	14.9438	0.044851	0.0226827	1.15459
GOTERM_CC_DIRECT	GO:0034673~inhibin-betaglycan-ActRII complex	2	0.124301	0.00131644	ACVR2A, TGFBR3	9	3	18224	1349.93	0.045059	0.0152511	1.16004
GOTERM_BP_DIRECT	GO:1905075~positive regulation of occluding junction disassembly	2	0.124301	0.000952636	TGFBR1, TGFB3	9	2	16792	1865.78	0.320878	0.0174351	1.32342
GOTERM_MF_DIRECT	GO:0005025~transforming growth factor beta receptor activity, type I	2	0.124301	0.00189444	TGFBR1, BMPR1B	9	4	16881	937.833	0.122642	0.0185179	1.93765
GOTERM_MF_DIRECT	GO:0030618~transforming growth factor beta receptor, pathway-specific cytoplasmic mediator activity	2	0.124301	0.00236756	SMAD5, SMAD3	9	5	16881	750.267	0.150881	0.0202369	2.41624
GOTERM_CC_DIRECT	GO:0071141~SMAD protein complex	2	0.124301	0.00350713	SMAD5, SMAD3	9	8	18224	506.222	0.115706	0.0302737	3.06402
GOTERM_MF_DIRECT	GO:0005024~transforming growth factor beta-activated receptor activity	2	0.124301	0.00331321	TGFBR1, TGFBR3	9	7	16881	535.905	0.204665	0.0251225	3.3665
GOTERM_BP_DIRECT	GO:0001666~response to hypoxia	3	0.186451	0.00280473	TGFB3, SMAD3, TGFBR3	9	172	16792	32.5426	0.680283	0.0483701	3.84996
GOTERM_BP_DIRECT	GO:0003223~ventricular compact myocardium morphogenesis	2	0.124301	0.00285553	TGFBR1, TGFBR3	9	6	16792	621.926	0.686828	0.0472237	3.91841
GOTERM_BP_DIRECT	GO:0003150~muscular septum morphogenesis	2	0.124301	0.00285553	BMP4, TGFBR3	9	6	16792	621.926	0.686828	0.0472237	3.91841
GOTERM_BP_DIRECT	GO:0030335~positive regulation of cell migration	3	0.186451	0.00320177	BMP4, TGFBR1, SMAD3	9	184	16792	30.4203	0.728014	0.0507472	4.38371
GOTERM_BP_DIRECT	GO:0001701~in utero embryonic development	3	0.186451	0.00330495	TGFBR1, TGFB3, SMAD3	9	187	16792	29.9323	0.739208	0.0503801	4.52197
GOTERM_BP_DIRECT	GO:0007435~salivary gland morphogenesis	2	0.124301	0.00333075	TGFB3, PAX6	9	7	16792	533.079	0.741935	0.0489306	4.55652
GOTERM_MF_DIRECT	GO:0005515~protein binding	9	0.559354	0.00537136	BMP4, ACVR2A, TGFBR1, SMAD5, TGFB3, PAX6, SMAD3, TGFBR3, BMPR1B	9	8785	16881	1.92157	0.310386	0.0364803	5.40587
GOTERM_MF_DIRECT	GO:0070410~co-SMAD binding	2	0.124301	0.00567391	PAX6, SMAD3	9	12	16881	312.611	0.324711	0.0350628	5.70235
GOTERM_MF_DIRECT	GO:0048185~activin binding	2	0.124301	0.00567391	ACVR2A, TGFBR3	9	12	16881	312.611	0.324711	0.0350628	5.70235
GOTERM_MF_DIRECT	GO:0031625~ubiquitin protein ligase binding	3	0.186451	0.00753771	SMAD5, PAX6, SMAD3	9	287	16881	19.6063	0.40671	0.0425732	7.51038
GOTERM_BP_DIRECT	GO:0060389~pathway-restricted SMAD protein phosphorylation	2	0.124301	0.00617795	TGFBR1, TGFBR3	9	13	16792	287.043	0.91922	0.0859392	8.29791
GOTERM_BP_DIRECT	GO:0060317~cardiac epithelial to mesenchymal transition	2	0.124301	0.00617795	TGFBR1, TGFBR3	9	13	16792	287.043	0.91922	0.0859392	8.29791
GOTERM_BP_DIRECT	GO:0010628~positive regulation of gene expression	3	0.186451	0.00638213	TGFBR1, PAX6, SMAD3	9	262	16792	21.3639	0.925686	0.0857363	8.56091
GOTERM_MF_DIRECT	GO:0070412~R-SMAD binding	2	0.124301	0.00991084	PAX6, SMAD3	9	21	16881	178.635	0.497047	0.051493	9.76717
GOTERM_BP_DIRECT	GO:0061036~positive regulation of cartilage development	2	0.124301	0.00759888	BMP4, BMPR1B	9	16	16792	233.222	0.954812	0.0980813	10.1137
GOTERM_BP_DIRECT	GO:0032331~negative regulation of chondrocyte differentiation	2	0.124301	0.00807213	BMP4, TGFBR1	9	17	16792	219.503	0.962768	0.100708	10.711
GOTERM_BP_DIRECT	GO:0045216~cell-cell junction organization	2	0.124301	0.00854518	TGFB3, SMAD3	9	18	16792	207.309	0.969323	0.103165	11.3044
GOTERM_BP_DIRECT	GO:0043393~regulation of protein binding	2	0.124301	0.00901804	TGFBR1, TGFBR3	9	19	16792	196.398	0.974725	0.105466	11.8939
GOTERM_BP_DIRECT	GO:0023019~signal transduction involved in regulation of gene expression	2	0.124301	0.00901804	PAX6, SMAD3	9	19	16792	196.398	0.974725	0.105466	11.8939
GOTERM_BP_DIRECT	GO:0032332~positive regulation of chondrocyte differentiation	2	0.124301	0.00901804	SMAD3, BMPR1B	9	19	16792	196.398	0.974725	0.105466	11.8939
GOTERM_MF_DIRECT	GO:0004674~protein serine/threonine kinase activity	3	0.186451	0.0126767	ACVR2A, TGFBR1, BMPR1B	9	376	16881	14.9654	0.585335	0.0609415	12.3346
GOTERM_MF_DIRECT	GO:0019838~growth factor binding	2	0.124301	0.0127267	ACVR2A, TGFBR1	9	27	16881	138.938	0.58678	0.0572163	12.3804
GOTERM_BP_DIRECT	GO:1902895~positive regulation of pri-miRNA transcription from RNA polymerase II promoter	2	0.124301	0.00949069	BMP4, SMAD3	9	20	16792	186.578	0.979175	0.107627	12.4795
GOTERM_MF_DIRECT	GO:0015026~coreceptor activity	2	0.124301	0.014132	ACVR2A, TGFBR3	9	30	16881	125.044	0.625462	0.0595331	13.6588
GOTERM_BP_DIRECT	GO:0032967~positive regulation of collagen biosynthetic process	2	0.124301	0.0109075	BMP4, TGFB3	9	23	16792	162.242	0.988354	0.119462	14.2132
GOTERM_BP_DIRECT	GO:0009880~embryonic pattern specification	2	0.124301	0.0109075	SMAD5, SMAD3	9	23	16792	162.242	0.988354	0.119462	14.2132
GOTERM_BP_DIRECT	GO:0051491~positive regulation of filopodium assembly	2	0.124301	0.0123225	TGFBR1, TGFB3	9	26	16792	143.521	0.993487	0.130497	15.9129
GOTERM_BP_DIRECT	GO:0042476~odontogenesis	2	0.124301	0.0127938	BMP4, TGFB3	9	27	16792	138.206	0.994635	0.131764	16.472
GOTERM_BP_DIRECT	GO:0021983~pituitary gland development	2	0.124301	0.0132648	BMP4, PAX6	9	28	16792	133.27	0.99558	0.132962	17.0275
GOTERM_BP_DIRECT	GO:0060412~ventricular septum morphogenesis	2	0.124301	0.0137357	TGFBR1, TGFBR3	9	29	16792	128.674	0.996358	0.134098	17.5792
GOTERM_MF_DIRECT	GO:0005057~receptor signaling protein activity	2	0.124301	0.0188036	TGFBR1, SMAD5	9	40	16881	93.7833	0.730127	0.0741539	17.7886
GOTERM_BP_DIRECT	GO:0007281~germ cell development	2	0.124301	0.0142064	BMP4, SMAD5	9	30	16792	124.385	0.997	0.135176	18.1274
GOTERM_BP_DIRECT	GO:0001654~eye development	2	0.124301	0.0142064	PAX6, BMPR1B	9	30	16792	124.385	0.997	0.135176	18.1274
GOTERM_BP_DIRECT	GO:0002088~lens development in camera-type eye	2	0.124301	0.0156173	TGFBR1, PAX6	9	33	16792	113.077	0.998323	0.144329	19.7502
GOTERM_BP_DIRECT	GO:0048286~lung alveolus development	2	0.124301	0.0160872	BMP4, TGFB3	9	34	16792	109.752	0.998618	0.145103	20.284
GOTERM_BP_DIRECT	GO:0001837~epithelial to mesenchymal transition	2	0.124301	0.0160872	TGFBR1, TGFBR3	9	34	16792	109.752	0.998618	0.145103	20.284
GOTERM_BP_DIRECT	GO:2001237~negative regulation of extrinsic apoptotic signaling pathway	2	0.124301	0.0179648	BMP4, TGFBR1	9	38	16792	98.1988	0.999364	0.157316	22.3843
GOTERM_BP_DIRECT	GO:0006468~protein phosphorylation	3	0.186451	0.0184852	TGFBR1, SMAD5, BMPR1B	9	456	16792	12.2749	0.999487	0.158159	22.9572
GOTERM_BP_DIRECT	GO:0030218~erythrocyte differentiation	2	0.124301	0.0189025	BMP4, SMAD5	9	40	16792	93.2889	0.999568	0.158168	23.4138
GOTERM_MF_DIRECT	GO:0000979~RNA polymerase II core promoter sequence-specific DNA binding	2	0.124301	0.026701	SMAD5, PAX6	9	57	16881	65.8129	0.845477	0.098545	24.366
GOTERM_BP_DIRECT	GO:0000186~activation of MAPKK activity	2	0.124301	0.0217107	BMP4, TGFBR1	9	46	16792	81.1208	0.999865	0.176121	26.4218
GOTERM_BP_DIRECT	GO:0003151~outflow tract morphogenesis	2	0.124301	0.0217107	BMP4, TGFBR3	9	46	16792	81.1208	0.999865	0.176121	26.4218
GOTERM_BP_DIRECT	GO:0016049~cell growth	2	0.124301	0.0263755	TGFB3, TGFBR3	9	56	16792	66.6349	0.999981	0.206179	31.177
GOTERM_BP_DIRECT	GO:0060041~retina development in camera-type eye	2	0.124301	0.0273061	PAX6, BMPR1B	9	58	16792	64.3372	0.999987	0.208777	32.0909
GOTERM_BP_DIRECT	GO:0006355~regulation of transcription, DNA-templated	4	0.248602	0.0284855	TGFBR1, SMAD5, PAX6, SMAD3	9	1504	16792	4.96217	0.999992	0.212939	33.2329
GOTERM_MF_DIRECT	GO:0030165~PDZ domain binding	2	0.124301	0.0400447	ACVR2A, TGFBR3	9	86	16881	43.6202	0.94039	0.137929	34.4075
GOTERM_BP_DIRECT	GO:0001938~positive regulation of endothelial cell proliferation	2	0.124301	0.0324105	BMP4, TGFBR1	9	69	16792	54.0805	0.999998	0.234735	36.9062
GOTERM_BP_DIRECT	GO:0007224~smoothened signaling pathway	2	0.124301	0.0324105	BMP4, PAX6	9	69	16792	54.0805	0.999998	0.234735	36.9062
GOTERM_BP_DIRECT	GO:0009791~post-embryonic development	2	0.124301	0.0342609	BMP4, TGFBR1	9	73	16792	51.1172	0.999999	0.242344	38.572
GOTERM_BP_DIRECT	GO:0001889~liver development	2	0.124301	0.034723	SMAD3, TGFBR3	9	74	16792	50.4264	0.999999	0.24113	38.9816
GOTERM_BP_DIRECT	GO:0009952~anterior/posterior pattern specification	2	0.124301	0.0374916	ACVR2A, TGFBR1	9	80	16792	46.6444	1	0.25377	41.3829
GOTERM_BP_DIRECT	GO:0001822~kidney development	2	0.124301	0.0402532	BMP4, TGFBR1	9	86	16792	43.3902	1	0.265749	43.6906
GOTERM_BP_DIRECT	GO:0000122~negative regulation of transcription from RNA polymerase II promoter	3	0.186451	0.0432884	BMP4, PAX6, SMAD3	9	720	16792	7.77407	1	0.278678	46.1293
GOTERM_MF_DIRECT	GO:0046872~metal ion binding	4	0.248602	0.064064	ACVR2A, TGFBR1, SMAD5, BMPR1B	9	2069	16881	3.62623	0.989625	0.204209	49.4991
GOTERM_CC_DIRECT	GO:0005667~transcription factor complex	2	0.124301	0.0816638	SMAD5, SMAD3	9	193	18224	20.9833	0.949294	0.449177	52.9799
GOTERM_CC_DIRECT	GO:0000790~nuclear chromatin	2	0.124301	0.0816638	PAX6, SMAD3	9	193	18224	20.9833	0.949294	0.449177	52.9799
GOTERM_CC_DIRECT	GO:0005886~plasma membrane	5	0.310752	0.0833821	ACVR2A, TGFBR1, TGFB3, SMAD3, BMPR1B	9	4121	18224	2.45679	0.952511	0.398228	53.7535
GOTERM_MF_DIRECT	GO:0003700~transcription factor activity, sequence-specific DNA binding	3	0.186451	0.0721153	SMAD5, PAX6, SMAD3	9	961	16881	5.85536	0.994284	0.218022	53.8064
GOTERM_MF_DIRECT	GO:0008201~heparin binding	2	0.124301	0.0733714	BMP4, TGFBR3	9	160	16881	23.4458	0.994794	0.212584	54.4476
GOTERM_MF_DIRECT	GO:0008083~growth factor activity	2	0.124301	0.0742578	BMP4, TGFB3	9	162	16881	23.1564	0.995127	0.20664	54.8953
GOTERM_BP_DIRECT	GO:0001934~positive regulation of protein phosphorylation	2	0.124301	0.0589393	BMP4, ACVR2A	9	127	16792	29.3823	1	0.356234	57.2221
GOTERM_MF_DIRECT	GO:0005125~cytokine activity	2	0.124301	0.0804425	BMP4, TGFB3	9	176	16881	21.3144	0.996931	0.214241	57.9096
GOTERM_BP_DIRECT	GO:0001501~skeletal system development	2	0.124301	0.0634484	TGFBR1, BMPR1B	9	137	16792	27.2376	1	0.37306	59.9998
GOTERM_BP_DIRECT	GO:0007050~cell cycle arrest	2	0.124301	0.0652467	TGFBR1, SMAD3	9	141	16792	26.4649	1	0.376439	61.0601
Table S5.1.10: PPI Module 10
Category	Term	Count	%	PValue	Genes	List Total	Pop Hits	Pop Total	Fold Enrichment	Bonferroni	Benjamini	FDR
GOTERM_CC_DIRECT	GO:0005891~voltage-gated calcium channel complex	8	0.605602	1.17969e-20	CACNA2D1, CACNA1G, CACNB1, CACNA1H, CACNB2, CACNB3, CACNB4, CACNA1S	8	29	18224	628.414	1.8875e-19	1.8875e-19	8.37736e-18
GOTERM_MF_DIRECT	GO:0005245~voltage-gated calcium channel activity	6	0.454201	1.20619e-12	CACNA2D1, CACNB1, CACNB2, CACNB3, CACNB4, CACNA1S	8	40	16881	316.519	1.56799e-11	1.56799e-11	7.98539e-10
GOTERM_BP_DIRECT	GO:0061337~cardiac conduction	6	0.454201	2.29824e-12	CACNA2D1, CACNB1, CACNB2, CACNB3, CACNB4, CACNA1S	8	45	16792	279.867	1.12615e-10	1.12615e-10	2.20358e-09
GOTERM_BP_DIRECT	GO:0070588~calcium ion transmembrane transport	6	0.454201	3.41042e-10	CACNA1G, CACNB1, CACNA1H, CACNB2, CACNB4, CACNA1S	8	119	16792	105.832	1.6711e-08	8.35552e-09	3.2699e-07
GOTERM_BP_DIRECT	GO:1901385~regulation of voltage-gated calcium channel activity	4	0.302801	1.55148e-09	CACNB1, CACNB2, CACNB3, CACNB4	8	7	16792	1199.43	7.60227e-08	2.53409e-08	1.48756e-06
GOTERM_MF_DIRECT	GO:0008331~high voltage-gated calcium channel activity	4	0.302801	5.2329e-09	CACNB1, CACNB2, CACNB3, CACNA1S	8	10	16881	844.05	6.80277e-08	3.40139e-08	3.46451e-06
GOTERM_BP_DIRECT	GO:0007528~neuromuscular junction development	4	0.302801	1.44675e-07	CACNB1, CACNB2, CACNB3, CACNB4	8	28	16792	299.857	7.08903e-06	1.77226e-06	0.000138713
GOTERM_BP_DIRECT	GO:0007268~chemical synaptic transmission	5	0.378501	1.37727e-06	CACNA1G, CACNB1, CACNB2, CACNB3, CACNB4	8	240	16792	43.7292	6.7484e-05	1.34972e-05	0.00132051
GOTERM_CC_DIRECT	GO:1990454~L-type voltage-gated calcium channel complex	3	0.227101	1.89565e-06	CACNA2D1, CACNB2, CACNB3	8	6	18224	1139	3.033e-05	1.51651e-05	0.00134616
GOTERM_BP_DIRECT	GO:0070509~calcium ion import	3	0.227101	2.01983e-05	CACNA1G, CACNA1H, CACNB2	8	17	16792	370.412	0.000989239	0.000164941	0.0193644
GOTERM_BP_DIRECT	GO:0086010~membrane depolarization during action potential	3	0.227101	5.6017e-05	CACNA1G, CACNA1H, CACNA1S	8	28	16792	224.893	0.00274114	0.000392053	0.053696
GOTERM_BP_DIRECT	GO:0086091~regulation of heart rate by cardiac conduction	3	0.227101	8.80523e-05	CACNA2D1, CACNA1G, CACNB2	8	35	16792	179.914	0.00430546	0.000539199	0.0843924
GOTERM_MF_DIRECT	GO:0005262~calcium channel activity	3	0.227101	0.000351204	CACNB2, CACNB3, CACNB4	8	70	16881	90.4339	0.00455604	0.00152099	0.232289
GOTERM_BP_DIRECT	GO:0006810~transport	4	0.302801	0.000290324	CACNB1, CACNA1H, CACNB3, CACNB4	8	348	16792	24.1264	0.0141272	0.00157963	0.278015
GOTERM_BP_DIRECT	GO:0006816~calcium ion transport	3	0.227101	0.00041834	CACNA2D1, CACNB3, CACNA1S	8	76	16792	82.8553	0.0202942	0.0020482	0.400383
GOTERM_CC_DIRECT	GO:0005886~plasma membrane	7	0.529902	0.000752617	CACNA2D1, CACNA1G, CACNB1, CACNB2, CACNB3, CACNB4, CACNA1S	8	4121	18224	3.86945	0.0119741	0.00400742	0.533234
GOTERM_MF_DIRECT	GO:0086056~voltage-gated calcium channel activity involved in AV node cell action potential	2	0.1514	0.00124356	CACNA1G, CACNB2	8	3	16881	1406.75	0.0160462	0.00403592	0.820442
GOTERM_MF_DIRECT	GO:0008332~low voltage-gated calcium channel activity	2	0.1514	0.00124356	CACNA1G, CACNA1H	8	3	16881	1406.75	0.0160462	0.00403592	0.820442
GOTERM_BP_DIRECT	GO:0034765~regulation of ion transmembrane transport	3	0.227101	0.000889912	CACNA1G, CACNA1H, CACNA1S	8	111	16792	56.7297	0.0426872	0.00395806	0.849991
GOTERM_MF_DIRECT	GO:0086007~voltage-gated calcium channel activity involved in cardiac muscle cell action potential	2	0.1514	0.00165779	CACNA2D1, CACNB2	8	4	16881	1055.06	0.0213381	0.00430453	1.09246
GOTERM_BP_DIRECT	GO:1901843~positive regulation of high voltage-gated calcium channel activity	2	0.1514	0.00125015	CACNA2D1, CACNB2	8	3	16792	1399.33	0.0594548	0.00509494	1.19222
GOTERM_BP_DIRECT	GO:0061577~calcium ion transmembrane transport via high voltage-gated calcium channel	2	0.1514	0.00125015	CACNA2D1, CACNB3	8	3	16792	1399.33	0.0594548	0.00509494	1.19222
GOTERM_BP_DIRECT	GO:0098903~regulation of membrane repolarization during action potential	2	0.1514	0.00125015	CACNA2D1, CACNB3	8	3	16792	1399.33	0.0594548	0.00509494	1.19222
GOTERM_BP_DIRECT	GO:0086045~membrane depolarization during AV node cell action potential	2	0.1514	0.00208284	CACNA1G, CACNB2	8	5	16792	839.6	0.0971198	0.00782808	1.97925
GOTERM_BP_DIRECT	GO:0060402~calcium ion transport into cytosol	2	0.1514	0.00582257	CACNA2D1, CACNB3	8	14	16792	299.857	0.248843	0.0202311	5.44512
GOTERM_BP_DIRECT	GO:0086002~cardiac muscle cell action potential involved in contraction	2	0.1514	0.00665199	CACNA2D1, CACNA1G	8	16	16792	262.375	0.278943	0.0215665	6.19876
GOTERM_BP_DIRECT	GO:0051899~membrane depolarization	2	0.1514	0.010377	CACNB3, CACNB4	8	25	16792	167.92	0.400184	0.0314409	9.51758
GOTERM_MF_DIRECT	GO:0097110~scaffold protein binding	2	0.1514	0.0197385	CACNA1G, CACNA1H	8	48	16881	87.9219	0.228306	0.0422749	12.3649
GOTERM_BP_DIRECT	GO:0042391~regulation of membrane potential	2	0.1514	0.0308545	CACNA1G, CACNA1H	8	75	16792	55.9733	0.784692	0.0863744	25.9546
GOTERM_BP_DIRECT	GO:0006936~muscle contraction	2	0.1514	0.0437686	CACNA1H, CACNA1S	8	107	16792	39.2336	0.88842	0.114705	34.8913
Table S5.1.11: PPI Module 11
Category	Term	Count	%	PValue	Genes	List Total	Pop Hits	Pop Total	Fold Enrichment	Bonferroni	Benjamini	FDR
GOTERM_MF_DIRECT	GO:0031489~myosin V binding	4	0.309119	2.96162e-08	RAB3A, RAB3B, RAB27B, RAB27A	8	17	16881	496.5	7.70022e-07	7.70022e-07	2.42876e-05
GOTERM_BP_DIRECT	GO:0045921~positive regulation of exocytosis	4	0.309119	3.36322e-08	RAB3A, EXPH5, RAB27B, RAB27A	7	21	16792	456.925	2.21972e-06	2.21972e-06	3.43869e-05
GOTERM_CC_DIRECT	GO:0030141~secretory granule	4	0.309119	2.22337e-06	RAB3B, RPH3A, RAB27B, RAB27A	8	74	18224	123.135	9.56006e-05	9.56006e-05	0.00206905
GOTERM_BP_DIRECT	GO:0071985~multivesicular body sorting pathway	3	0.231839	7.01126e-06	EXPH5, RAB27B, RAB27A	7	12	16792	599.714	0.000462638	0.000231346	0.00716836
GOTERM_BP_DIRECT	GO:0007264~small GTPase mediated signal transduction	4	0.309119	6.01285e-05	RAB3A, RAB3B, RAB27B, RAB27A	7	246	16792	39.0058	0.00396074	0.00132199	0.0614607
GOTERM_MF_DIRECT	GO:0003924~GTPase activity	4	0.309119	8.83291e-05	RAB3A, RAB3B, RAB27B, RAB27A	8	234	16881	36.0705	0.00229402	0.00114767	0.0724137
GOTERM_MF_DIRECT	GO:0019003~GDP binding	3	0.231839	0.000208764	RAB3B, RAB27B, RAB27A	8	54	16881	117.229	0.00541373	0.00180784	0.171074
GOTERM_MF_DIRECT	GO:0005525~GTP binding	4	0.309119	0.000381883	RAB3A, RAB3B, RAB27B, RAB27A	8	384	16881	21.9805	0.00988172	0.00247964	0.312744
GOTERM_CC_DIRECT	GO:0008021~synaptic vesicle	3	0.231839	0.000520749	RAB3A, RAB3B, RPH3A	8	92	18224	74.2826	0.0221491	0.0111365	0.483561
GOTERM_CC_DIRECT	GO:0005622~intracellular	5	0.386399	0.000831046	RAB3A, EXPH5, RPH3A, RAB27B, RAB27A	8	1332	18224	8.55105	0.0351184	0.0118459	0.770706
GOTERM_MF_DIRECT	GO:0017137~Rab GTPase binding	3	0.231839	0.00127958	EXPH5, RPH3A, RIMS1	8	134	16881	47.2416	0.0327424	0.00663597	1.04454
GOTERM_BP_DIRECT	GO:1903307~positive regulation of regulated secretory pathway	2	0.15456	0.0017855	RAB3A, RAB27A	7	5	16792	959.543	0.111258	0.0290566	1.81061
GOTERM_BP_DIRECT	GO:0006886~intracellular protein transport	3	0.231839	0.00284252	EXPH5, RPH3A, RIMS1	7	236	16792	30.4939	0.171281	0.0368775	2.8685
GOTERM_CC_DIRECT	GO:0032585~multivesicular body membrane	2	0.15456	0.00345243	RAB27B, RAB27A	8	9	18224	506.222	0.138182	0.0364952	3.16715
GOTERM_BP_DIRECT	GO:0032402~melanosome transport	2	0.15456	0.00748126	RAB27B, RAB27A	7	21	16792	228.463	0.390807	0.0792836	7.39054
GOTERM_BP_DIRECT	GO:0016079~synaptic vesicle exocytosis	2	0.15456	0.00783635	RAB3A, RIMS1	7	22	16792	218.078	0.405025	0.0714923	7.72874
GOTERM_MF_DIRECT	GO:0030742~GTP-dependent protein binding	2	0.15456	0.00991142	RAB3A, RAB3B	8	24	16881	175.844	0.228164	0.0422455	7.84395
GOTERM_BP_DIRECT	GO:0014047~glutamate secretion	2	0.15456	0.00996463	RAB3A, RIMS1	7	28	16792	171.347	0.483647	0.0792995	9.73255
GOTERM_CC_DIRECT	GO:0048786~presynaptic active zone	2	0.15456	0.0110879	ERC2, RIMS1	8	29	18224	157.103	0.380873	0.091435	9.85588
GOTERM_CC_DIRECT	GO:0030054~cell junction	3	0.231839	0.0122229	ERC2, RPH3A, RIMS1	8	459	18224	14.8889	0.410703	0.0843649	10.8141
GOTERM_BP_DIRECT	GO:0048791~calcium ion-regulated exocytosis of neurotransmitter	2	0.15456	0.0138566	RPH3A, RIMS1	7	39	16792	123.018	0.601852	0.0972645	13.2956
GOTERM_BP_DIRECT	GO:0007269~neurotransmitter secretion	2	0.15456	0.0180878	RAB3A, RIMS1	7	51	16792	94.0728	0.700226	0.113499	17.0249
GOTERM_BP_DIRECT	GO:0019882~antigen processing and presentation	2	0.15456	0.0194949	RAB3B, RAB27A	7	55	16792	87.2312	0.727296	0.111415	18.2326
GOTERM_CC_DIRECT	GO:0042734~presynaptic membrane	2	0.15456	0.0235769	ERC2, RIMS1	8	62	18224	73.4839	0.641544	0.13633	19.9112
GOTERM_BP_DIRECT	GO:0006887~exocytosis	2	0.15456	0.0292972	RIMS1, RAB27A	7	83	16792	57.8038	0.859494	0.150869	26.2155
GOTERM_CC_DIRECT	GO:0042470~melanosome	2	0.15456	0.0381621	RAB27B, RAB27A	8	101	18224	45.1089	0.812336	0.188716	30.378
GOTERM_MF_DIRECT	GO:0005515~protein binding	7	0.540958	0.0769801	RAB3A, RAB3B, ERC2, RPH3A, RAB27B, RIMS1, RAB27A	8	8785	16881	1.68137	0.875409	0.25735	48.1554
GOTERM_MF_DIRECT	GO:0019904~protein domain specific binding	2	0.15456	0.0831415	RAB27B, RAB27A	8	208	16881	20.2897	0.895321	0.245807	50.9262
GOTERM_CC_DIRECT	GO:0005768~endosome	2	0.15456	0.0833017	RAB3A, EXPH5	8	225	18224	20.2489	0.976246	0.340027	55.4877
GOTERM_BP_DIRECT	GO:0010628~positive regulation of gene expression	2	0.15456	0.0900523	RIMS1, RAB27A	7	262	16792	18.3119	0.998027	0.380659	61.8963
Table S5.1.12: PPI Module 12
Category	Term	Count	%	PValue	Genes	List Total	Pop Hits	Pop Total	Fold Enrichment	Bonferroni	Benjamini	FDR
GOTERM_CC_DIRECT	GO:0000502~proteasome complex	6	0.436999	6.81626e-12	PSMB6, PSMA5, PSME3, PSMD7, PSMD8, USP14	8	60	18224	227.8	1.9767e-10	1.9767e-10	5.75523e-09
GOTERM_BP_DIRECT	GO:0090263~positive regulation of canonical Wnt signaling pathway	6	0.436999	3.55834e-10	PSMB6, PSMA5, TNKS, PSME3, PSMD7, PSMD8	8	120	16792	104.95	2.09942e-08	2.09942e-08	3.55329e-07
GOTERM_BP_DIRECT	GO:0006521~regulation of cellular amino acid metabolic process	5	0.364166	2.62343e-09	PSMB6, PSMA5, PSME3, PSMD7, PSMD8	8	51	16792	205.784	1.54782e-07	7.73912e-08	2.61971e-06
GOTERM_BP_DIRECT	GO:0000209~protein polyubiquitination	6	0.436999	3.08678e-09	PSMB6, PSMA5, TNKS, PSME3, PSMD7, PSMD8	8	184	16792	68.4457	1.8212e-07	6.07066e-08	3.0824e-06
GOTERM_BP_DIRECT	GO:0002479~antigen processing and presentation of exogenous peptide antigen via MHC class I, TAP-dependent	5	0.364166	6.2425e-09	PSMB6, PSMA5, PSME3, PSMD7, PSMD8	8	63	16792	166.587	3.68308e-07	9.20769e-08	6.23365e-06
GOTERM_BP_DIRECT	GO:0038061~NIK/NF-kappaB signaling	5	0.364166	7.54982e-09	PSMB6, PSMA5, PSME3, PSMD7, PSMD8	8	66	16792	159.015	4.45439e-07	8.90879e-08	7.53912e-06
GOTERM_BP_DIRECT	GO:0051436~negative regulation of ubiquitin-protein ligase activity involved in mitotic cell cycle	5	0.364166	1.0171e-08	PSMB6, PSMA5, PSME3, PSMD7, PSMD8	8	71	16792	147.817	6.00086e-07	1.00014e-07	1.01565e-05
GOTERM_BP_DIRECT	GO:0051437~positive regulation of ubiquitin-protein ligase activity involved in regulation of mitotic cell cycle transition	5	0.364166	1.34204e-08	PSMB6, PSMA5, PSME3, PSMD7, PSMD8	8	76	16792	138.092	7.91803e-07	1.13115e-07	1.34014e-05
GOTERM_BP_DIRECT	GO:0031145~anaphase-promoting complex-dependent catabolic process	5	0.364166	1.571e-08	PSMB6, PSMA5, PSME3, PSMD7, PSMD8	8	79	16792	132.848	9.26887e-07	1.15861e-07	1.56877e-05
GOTERM_BP_DIRECT	GO:0060071~Wnt signaling pathway, planar cell polarity pathway	5	0.364166	2.91609e-08	PSMB6, PSMA5, PSME3, PSMD7, PSMD8	8	92	16792	114.076	1.72049e-06	1.91166e-07	2.91196e-05
GOTERM_BP_DIRECT	GO:0043488~regulation of mRNA stability	5	0.364166	4.60694e-08	PSMB6, PSMA5, PSME3, PSMD7, PSMD8	8	103	16792	101.893	2.71809e-06	2.71809e-07	4.6004e-05
GOTERM_BP_DIRECT	GO:0002223~stimulatory C-type lectin receptor signaling pathway	5	0.364166	4.97953e-08	PSMB6, PSMA5, PSME3, PSMD7, PSMD8	8	105	16792	99.9524	2.93792e-06	2.67084e-07	4.97247e-05
GOTERM_BP_DIRECT	GO:0033209~tumor necrosis factor-mediated signaling pathway	5	0.364166	7.97887e-08	PSMB6, PSMA5, PSME3, PSMD7, PSMD8	8	118	16792	88.9407	4.70752e-06	3.92294e-07	7.96756e-05
GOTERM_BP_DIRECT	GO:0050852~T cell receptor signaling pathway	5	0.364166	1.98676e-07	PSMB6, PSMA5, PSME3, PSMD7, PSMD8	8	148	16792	70.9122	1.17218e-05	9.01681e-07	0.000198394
GOTERM_BP_DIRECT	GO:0090090~negative regulation of canonical Wnt signaling pathway	5	0.364166	2.92789e-07	PSMB6, PSMA5, PSME3, PSMD7, PSMD8	8	163	16792	64.3865	1.72744e-05	1.2339e-06	0.000292374
GOTERM_BP_DIRECT	GO:0038095~Fc-epsilon receptor signaling pathway	5	0.364166	4.16786e-07	PSMB6, PSMA5, PSME3, PSMD7, PSMD8	8	178	16792	58.9607	2.45901e-05	1.63936e-06	0.000416194
GOTERM_BP_DIRECT	GO:0043161~proteasome-mediated ubiquitin-dependent protein catabolic process	5	0.364166	7.05468e-07	PSMB6, PSMA5, PSME3, PSMD7, PSMD8	8	203	16792	51.6995	4.16217e-05	2.60141e-06	0.000704465
GOTERM_BP_DIRECT	GO:0000165~MAPK cascade	5	0.364166	1.95397e-06	PSMB6, PSMA5, PSME3, PSMD7, PSMD8	8	262	16792	40.0573	0.000115278	6.78142e-06	0.00195119
GOTERM_CC_DIRECT	GO:0005829~cytosol	6	0.436999	0.00300708	PSMB6, PSMA5, TNKS, PSME3, PSMD7, PSMD8	8	3315	18224	4.12308	0.0836314	0.0427286	2.51078
GOTERM_CC_DIRECT	GO:0005838~proteasome regulatory particle	2	0.145666	0.00421825	PSMD7, PSMD8	8	11	18224	414.182	0.115372	0.040039	3.50624
GOTERM_MF_DIRECT	GO:0004298~threonine-type endopeptidase activity	2	0.145666	0.00744194	PSMB6, PSMA5	7	21	16881	229.673	0.132314	0.132314	5.44435
GOTERM_BP_DIRECT	GO:0061136~regulation of proteasomal protein catabolic process	2	0.145666	0.00665199	PSME3, USP14	8	16	16792	262.375	0.325497	0.021639	6.44751
GOTERM_CC_DIRECT	GO:0005839~proteasome core complex	2	0.145666	0.00803977	PSMB6, PSMA5	8	21	18224	216.952	0.208714	0.0568443	6.58868
GOTERM_CC_DIRECT	GO:0005654~nucleoplasm	5	0.364166	0.0129067	PSMB6, PSMA5, PSME3, PSMD7, PSMD8	8	2784	18224	4.09124	0.3139	0.0725778	10.3885
GOTERM_CC_DIRECT	GO:0070062~extracellular exosome	5	0.364166	0.0133615	PSMB6, PSMA5, PSMD7, PSMD8, USP14	8	2811	18224	4.05194	0.323008	0.0629474	10.7365
GOTERM_BP_DIRECT	GO:0051028~mRNA transport	2	0.145666	0.0194324	TNKS, XPO7	8	47	16792	89.3191	0.685822	0.0591171	17.7953
GOTERM_CC_DIRECT	GO:0005643~nuclear pore	2	0.145666	0.0273346	TNKS, XPO7	8	72	18224	63.2778	0.552349	0.108473	20.8647
GOTERM_CC_DIRECT	GO:0005634~nucleus	6	0.436999	0.027595	PSMB6, PSMA5, PSME3, XPO7, PSMD7, PSMD8	8	5415	18224	2.5241	0.555811	0.0964628	21.0434
Table S5.1.13: PPI Module 13
Category	Term	Count	%	PValue	Genes	List Total	Pop Hits	Pop Total	Fold Enrichment	Bonferroni	Benjamini	FDR
GOTERM_BP_DIRECT	GO:0071526~semaphorin-plexin signaling pathway	4	0.306984	2.40732e-07	PLXNB1, PLXNB2, SEMA4D, PLXND1	8	33	16792	254.424	1.70919e-05	1.70919e-05	0.00024986
GOTERM_BP_DIRECT	GO:0007162~negative regulation of cell adhesion	4	0.306984	3.42587e-07	RND1, PLXNB1, PLXNB2, SEMA4D	8	37	16792	226.919	2.43234e-05	1.21618e-05	0.000355576
GOTERM_CC_DIRECT	GO:0002116~semaphorin receptor complex	3	0.230238	6.94438e-06	PLXNB1, PLXNB2, PLXND1	8	11	18224	621.273	0.000152765	0.000152765	0.00543478
GOTERM_MF_DIRECT	GO:0017154~semaphorin receptor activity	3	0.230238	9.70878e-06	PLXNB1, PLXNB2, PLXND1	8	12	16881	527.531	0.000145622	0.000145622	0.00674993
GOTERM_BP_DIRECT	GO:1902287~semaphorin-plexin signaling pathway involved in axon guidance	3	0.230238	9.81187e-06	PLXNB1, PLXNB2, PLXND1	8	12	16792	524.75	0.000696404	0.000232188	0.0101834
GOTERM_BP_DIRECT	GO:0030334~regulation of cell migration	3	0.230238	0.000396627	PLXNB1, PLXNB2, PLXND1	8	74	16792	85.0946	0.0277731	0.00701679	0.410901
GOTERM_BP_DIRECT	GO:1900220~semaphorin-plexin signaling pathway involved in bone trabecula morphogenesis	2	0.153492	0.000833581	PLXNB1, SEMA4D	8	2	16792	2099	0.0574902	0.011772	0.861814
GOTERM_BP_DIRECT	GO:0008360~regulation of cell shape	3	0.230238	0.00141016	PLXNB1, PLXNB2, SEMA4D	8	140	16792	44.9786	0.0953361	0.01656	1.45399
GOTERM_MF_DIRECT	GO:0003924~GTPase activity	3	0.230238	0.00383774	RND2, RND1, RRAS	8	234	16881	27.0529	0.0560451	0.0284266	2.63794
GOTERM_BP_DIRECT	GO:0043931~ossification involved in bone maturation	2	0.153492	0.00291493	PLXNB1, SEMA4D	8	7	16792	599.714	0.187194	0.0291748	2.98443
GOTERM_BP_DIRECT	GO:0048672~positive regulation of collateral sprouting	2	0.153492	0.00333075	RND2, SEMA4D	8	8	16792	524.75	0.210913	0.0291757	3.40355
GOTERM_BP_DIRECT	GO:0007264~small GTPase mediated signal transduction	3	0.230238	0.00427613	RND2, RND1, RRAS	8	246	16792	25.5976	0.262328	0.0332412	4.35033
GOTERM_MF_DIRECT	GO:0030215~semaphorin receptor binding	2	0.153492	0.00950014	PLXNB1, SEMA4D	8	23	16881	183.489	0.133405	0.0466067	6.4212
GOTERM_MF_DIRECT	GO:0005525~GTP binding	3	0.230238	0.0100483	RND2, RND1, RRAS	8	384	16881	16.4854	0.14057	0.0371634	6.78065
GOTERM_MF_DIRECT	GO:0005515~protein binding	8	0.613968	0.0103254	RND2, RND1, PLXNB1, PLXNB2, RRAS, SEMA4D, PLXND1, TACC1	8	8785	16881	1.92157	0.144172	0.0306575	6.96194
GOTERM_BP_DIRECT	GO:0050772~positive regulation of axonogenesis	2	0.153492	0.00872295	PLXNB1, PLXNB2	8	21	16792	199.905	0.463155	0.0603094	8.69222
GOTERM_CC_DIRECT	GO:0005887~integral component of plasma membrane	4	0.306984	0.0128884	PLXNB1, PLXNB2, SEMA4D, PLXND1	8	1415	18224	6.43958	0.248278	0.132981	9.65412
GOTERM_BP_DIRECT	GO:0043087~regulation of GTPase activity	2	0.153492	0.0267883	PLXNB1, PLXNB2	8	65	16792	64.5846	0.854548	0.160765	24.56
GOTERM_BP_DIRECT	GO:0014068~positive regulation of phosphatidylinositol 3-kinase signaling	2	0.153492	0.0267883	PLXNB1, SEMA4D	8	65	16792	64.5846	0.854548	0.160765	24.56
GOTERM_CC_DIRECT	GO:0005886~plasma membrane	5	0.38373	0.0505707	RND1, PLXNB1, RRAS, SEMA4D, PLXND1	8	4121	18224	2.76389	0.680715	0.31652	33.3784
GOTERM_MF_DIRECT	GO:0004888~transmembrane signaling receptor activity	2	0.153492	0.085449	PLXNB1, SEMA4D	8	214	16881	19.7208	0.73811	0.200129	46.2604
GOTERM_MF_DIRECT	GO:0004872~receptor activity	2	0.153492	0.0866009	PLXNB1, SEMA4D	8	217	16881	19.4482	0.743015	0.176429	46.7292
GOTERM_CC_DIRECT	GO:0005622~intracellular	3	0.230238	0.0876482	RND1, PLXNB1, RRAS	8	1332	18224	5.13063	0.867086	0.3962	51.2228
Table S5.1.14: PPI Module 14
Category	Term	Count	%	PValue	Genes	List Total	Pop Hits	Pop Total	Fold Enrichment	Bonferroni	Benjamini	FDR
GOTERM_BP_DIRECT	GO:0006260~DNA replication	5	0.342466	1.03265e-07	CDC7, RAD1, CDC6, RFC3, MCM7	7	155	16792	77.3825	6.60893e-06	6.60893e-06	0.000104907
GOTERM_BP_DIRECT	GO:0006270~DNA replication initiation	4	0.273973	1.2524e-07	CDC7, CDC6, MCM7, PURA	7	32	16792	299.857	8.01535e-06	4.00768e-06	0.000127232
GOTERM_CC_DIRECT	GO:0005654~nucleoplasm	6	0.410959	0.000434426	CDC7, GINS1, RAD1, CDC6, RFC3, MCM7	7	2784	18224	5.61084	0.00951389	0.00951389	0.339493
GOTERM_BP_DIRECT	GO:0000082~G1/S transition of mitotic cell cycle	3	0.205479	0.00053942	CDC7, CDC6, MCM7	7	102	16792	70.5546	0.0339428	0.0114447	0.546647
GOTERM_BP_DIRECT	GO:0006268~DNA unwinding involved in DNA replication	2	0.136986	0.00356835	MCM7, PURA	7	10	16792	479.771	0.204498	0.0555907	3.56643
GOTERM_BP_DIRECT	GO:0006271~DNA strand elongation involved in DNA replication	2	0.136986	0.00534853	GINS1, RFC3	7	15	16792	319.848	0.290521	0.0663419	5.30242
GOTERM_CC_DIRECT	GO:0005634~nucleus	6	0.410959	0.0104447	CDC7, GINS1, RAD1, CDC6, MCM7, PURA	7	5415	18224	2.88469	0.206254	0.109076	7.88879
GOTERM_MF_DIRECT	GO:0003697~single-stranded DNA binding	2	0.136986	0.0326077	MCM7, PURA	7	93	16881	51.8618	0.591426	0.591426	24.0164
GOTERM_CC_DIRECT	GO:0000784~nuclear chromosome, telomeric region	2	0.136986	0.0420503	MCM7, PURA	7	130	18224	40.0527	0.611367	0.27024	28.5534
GOTERM_BP_DIRECT	GO:1901796~regulation of signal transduction by p53 class mediator	2	0.136986	0.0435032	RAD1, RFC3	7	124	16792	38.6912	0.941958	0.377761	36.3552
GOTERM_CC_DIRECT	GO:0005737~cytoplasm	5	0.342466	0.0602673	CDC7, GINS1, CDC6, MCM7, PURA	7	5222	18224	2.49275	0.745261	0.289566	38.5216
GOTERM_BP_DIRECT	GO:0006974~cellular response to DNA damage stimulus	2	0.136986	0.0720677	RAD1, MCM7	7	208	16792	23.0659	0.991662	0.495331	53.2268
GOTERM_MF_DIRECT	GO:0005524~ATP binding	3	0.205479	0.0924719	CDC7, CDC6, MCM7	7	1495	16881	4.83927	0.927185	0.730157	55.2413
Table S5.1.15: PPI Module 15
Category	Term	Count	%	PValue	Genes	List Total	Pop Hits	Pop Total	Fold Enrichment	Bonferroni	Benjamini	FDR
GOTERM_MF_DIRECT	GO:0005484~SNAP receptor activity	5	0.491642	1.21384e-10	STX1A, VTI1B, VAMP3, SNAP23, VAMP1	6	39	16881	360.705	2.54907e-09	2.54907e-09	9.37253e-08
GOTERM_CC_DIRECT	GO:0031201~SNARE complex	5	0.491642	3.17996e-10	STX1A, VTI1B, VAMP3, SNAP23, VAMP1	6	53	18224	286.541	1.65358e-08	1.65358e-08	3.08954e-07
GOTERM_MF_DIRECT	GO:0000149~SNARE binding	4	0.393314	1.88645e-07	STX1A, VTI1B, VAMP3, VAMP1	6	46	16881	244.652	3.96153e-06	1.98077e-06	0.000145659
GOTERM_BP_DIRECT	GO:0061025~membrane fusion	4	0.393314	1.67243e-07	STX1A, VTI1B, VAMP3, SNAP23	6	44	16792	254.424	9.70006e-06	9.70006e-06	0.000166396
GOTERM_BP_DIRECT	GO:0016192~vesicle-mediated transport	4	0.393314	7.176e-06	STX1A, VTI1B, VAMP3, VAMP1	6	152	16792	73.6491	0.000416123	0.000208083	0.00713942
GOTERM_CC_DIRECT	GO:0043005~neuron projection	3	0.294985	0.00164119	STX1A, VAMP3, SNAP23	6	237	18224	38.4473	0.081866	0.0418069	1.58316
GOTERM_BP_DIRECT	GO:0035493~SNARE complex assembly	2	0.196657	0.0017855	VAMP3, VAMP1	6	6	16792	932.889	0.0984607	0.0339605	1.76233
GOTERM_MF_DIRECT	GO:0019869~chloride channel inhibitor activity	2	0.196657	0.00266319	STX1A, VTI1B	6	9	16881	625.222	0.0544624	0.0184941	2.03804
GOTERM_CC_DIRECT	GO:0042581~specific granule	2	0.196657	0.00356203	SNAP23, ANXA3	6	13	18224	467.282	0.169358	0.0599781	3.40751
GOTERM_BP_DIRECT	GO:0031629~synaptic vesicle fusion to presynaptic active zone membrane	2	0.196657	0.00356845	STX1A, SNAP23	6	12	16792	466.444	0.187257	0.0505146	3.49422
GOTERM_CC_DIRECT	GO:0030054~cell junction	3	0.294985	0.00601856	STX1A, VAMP3, VAMP1	6	459	18224	19.8519	0.269416	0.0754773	5.69641
GOTERM_BP_DIRECT	GO:0006904~vesicle docking involved in exocytosis	2	0.196657	0.00771876	VTI1B, VAMP3	6	26	16792	215.282	0.362005	0.0859637	7.41977
GOTERM_MF_DIRECT	GO:0048306~calcium-dependent protein binding	2	0.196657	0.0170634	STX1A, ANXA3	6	58	16881	97.0172	0.303317	0.0863943	12.4439
GOTERM_CC_DIRECT	GO:0030672~synaptic vesicle membrane	2	0.196657	0.0150008	STX1A, VAMP1	6	55	18224	110.448	0.544315	0.145459	13.6574
GOTERM_BP_DIRECT	GO:0006906~vesicle fusion	2	0.196657	0.0174469	VAMP3, VAMP1	6	59	16792	94.8701	0.639713	0.156455	16.0642
GOTERM_CC_DIRECT	GO:0030141~secretory granule	2	0.196657	0.0201409	STX1A, VAMP3	6	74	18224	82.0901	0.652856	0.161664	17.9367
GOTERM_BP_DIRECT	GO:0042147~retrograde transport, endosome to Golgi	2	0.196657	0.0203798	VTI1B, VAMP3	6	69	16792	81.1208	0.697065	0.156846	18.5238
GOTERM_CC_DIRECT	GO:0016021~integral component of membrane	5	0.491642	0.0248938	STX1A, VTI1B, VAMP3, SNAP23, VAMP1	6	5163	18224	2.94144	0.730412	0.170777	21.7233
GOTERM_CC_DIRECT	GO:0008021~synaptic vesicle	2	0.196657	0.0249906	STX1A, VTI1B	6	92	18224	66.029	0.7318	0.151685	21.7988
GOTERM_BP_DIRECT	GO:0006887~exocytosis	2	0.196657	0.0244739	VAMP3, VAMP1	6	83	16792	67.4378	0.762395	0.164432	21.8491
GOTERM_CC_DIRECT	GO:0055037~recycling endosome	2	0.196657	0.0298211	VTI1B, VAMP3	6	110	18224	55.2242	0.792845	0.160477	25.4827
GOTERM_CC_DIRECT	GO:0005829~cytosol	4	0.393314	0.0449382	STX1A, VTI1B, VAMP3, VAMP1	6	3315	18224	3.66496	0.908454	0.212657	36.0275
GOTERM_CC_DIRECT	GO:0005886~plasma membrane	4	0.393314	0.07993	STX1A, VAMP3, SNAP23, ANXA3	6	4121	18224	2.94815	0.986857	0.325516	55.486
GOTERM_CC_DIRECT	GO:0043025~neuronal cell body	2	0.196657	0.0834969	VTI1B, ANXA3	6	315	18224	19.2847	0.989261	0.314648	57.1346
Table S5.1.16: PPI Module 16
Category	Term	Count	%	PValue	Genes	List Total	Pop Hits	Pop Total	Fold Enrichment	Bonferroni	Benjamini	FDR
GOTERM_MF_DIRECT	GO:0070326~very-low-density lipoprotein particle receptor binding	2	0.185357	0.00118434	RELN, LRPAP1	6	4	16881	1406.75	0.0360698	0.0360698	1.01289
GOTERM_BP_DIRECT	GO:0038026~reelin-mediated signaling pathway	2	0.185357	0.00119062	RELN, VLDLR	6	4	16792	1399.33	0.12491	0.12491	1.34139
GOTERM_BP_DIRECT	GO:0021517~ventral spinal cord development	2	0.185357	0.0017855	RELN, VLDLR	6	6	16792	932.889	0.181396	0.0952327	2.00543
GOTERM_MF_DIRECT	GO:0005041~low-density lipoprotein receptor activity	2	0.185357	0.00384501	LRP2, VLDLR	6	13	16881	432.846	0.11257	0.0579647	3.25539
GOTERM_CC_DIRECT	GO:0005886~plasma membrane	5	0.463392	0.0106985	MAGI1, RELN, LRP2, LRPAP1, VLDLR	6	4121	18224	3.68519	0.390296	0.390296	9.66679
GOTERM_CC_DIRECT	GO:0005905~clathrin-coated pit	2	0.185357	0.0150008	LRP2, VLDLR	6	55	18224	110.448	0.501058	0.293642	13.3124
GOTERM_BP_DIRECT	GO:0045860~positive regulation of protein kinase activity	2	0.185357	0.0139183	RELN, VLDLR	6	47	16792	119.092	0.791913	0.407418	14.6904
GOTERM_CC_DIRECT	GO:0005783~endoplasmic reticulum	3	0.278035	0.0188126	CLU, LRP2, LRPAP1	6	828	18224	11.0048	0.582564	0.25264	16.4318
GOTERM_CC_DIRECT	GO:0005794~Golgi apparatus	3	0.278035	0.0203575	CLU, LRP2, LRPAP1	6	863	18224	10.5585	0.61175	0.210635	17.6672
GOTERM_CC_DIRECT	GO:0043235~receptor complex	2	0.185357	0.0343656	LRP2, VLDLR	6	127	18224	47.832	0.799836	0.275102	28.1457
GOTERM_BP_DIRECT	GO:0006629~lipid metabolic process	2	0.185357	0.0458878	CLU, LRP2	6	157	16792	35.6518	0.99481	0.731599	41.2857
GOTERM_CC_DIRECT	GO:0005768~endosome	2	0.185357	0.0602326	LRP2, LRPAP1	6	225	18224	26.9985	0.942597	0.378908	44.4104
GOTERM_BP_DIRECT	GO:0006898~receptor-mediated endocytosis	2	0.185357	0.0541764	LRP2, VLDLR	6	186	16792	30.0932	0.998047	0.712825	46.815
Table S5.1.17: PPI Module 17
Category	Term	Count	%	PValue	Genes	List Total	Pop Hits	Pop Total	Fold Enrichment	Bonferroni	Benjamini	FDR
GOTERM_MF_DIRECT	GO:0004871~signal transducer activity	4	0.460299	6.89483e-06	RGS6, GNB5, GNG4, GNG5	5	204	16881	66.2	5.51573e-05	5.51573e-05	0.00377456
GOTERM_CC_DIRECT	GO:0005834~heterotrimeric G-protein complex	3	0.345224	1.90356e-05	RGS6, GNG4, GNG5	5	33	18224	331.345	0.000418699	0.000418699	0.0148969
GOTERM_BP_DIRECT	GO:0007186~G-protein coupled receptor signaling pathway	4	0.460299	0.000587379	RGS6, GNB5, GNG4, GNG5	5	899	16792	14.9428	0.0116823	0.0116823	0.446182
GOTERM_BP_DIRECT	GO:0008277~regulation of G-protein coupled receptor protein signaling pathway	2	0.23015	0.00925865	RGS6, GNG4	5	39	16792	172.226	0.169756	0.0888227	6.83472
GOTERM_BP_DIRECT	GO:0071377~cellular response to glucagon stimulus	2	0.23015	0.0094952	GNG4, GNG5	5	40	16792	167.92	0.173712	0.0616233	7.00389
GOTERM_MF_DIRECT	GO:0003924~GTPase activity	2	0.23015	0.0543094	GNB5, GNG5	5	234	16881	28.8564	0.360276	0.200173	26.3391
GOTERM_CC_DIRECT	GO:0005886~plasma membrane	4	0.460299	0.0383911	RGS6, GNB5, GNG4, GNG5	5	4121	18224	3.53778	0.577364	0.349895	26.3894
GOTERM_MF_DIRECT	GO:0005096~GTPase activator activity	2	0.23015	0.0644945	RGS6, GNB5	5	279	16881	24.2022	0.413361	0.162875	30.5789
GOTERM_MF_DIRECT	GO:0005515~protein binding	5	0.575374	0.0733216	STMN2, RGS6, GNB5, GNG4, GNG5	5	8785	16881	1.92157	0.456209	0.141267	34.0901
Table S5.1.18: PPI Module 18
Category	Term	Count	%	PValue	Genes	List Total	Pop Hits	Pop Total	Fold Enrichment	Bonferroni	Benjamini	FDR
GOTERM_CC_DIRECT	GO:0005743~mitochondrial inner membrane	4	0.732601	5.52911e-05	SDHB, CYCS, UQCRFS1, COX5A	5	441	18224	33.0594	0.00132614	0.00132614	0.0443451
GOTERM_MF_DIRECT	GO:0009055~electron carrier activity	3	0.549451	0.00016749	SDHB, CYCS, COX5A	5	90	16881	112.54	0.00351141	0.00351141	0.129252
GOTERM_BP_DIRECT	GO:0006122~mitochondrial electron transport, ubiquinol to cytochrome c	2	0.3663	0.00356866	CYCS, UQCRFS1	5	15	16792	447.787	0.133248	0.133248	3.21791
GOTERM_BP_DIRECT	GO:0006123~mitochondrial electron transport, cytochrome c to oxygen	2	0.3663	0.00475609	CYCS, COX5A	5	20	16792	335.84	0.173618	0.0909442	4.26799
GOTERM_MF_DIRECT	GO:0051537~2 iron, 2 sulfur cluster binding	2	0.3663	0.0059112	SDHB, UQCRFS1	5	25	16881	270.096	0.117065	0.0603537	4.47459
GOTERM_MF_DIRECT	GO:0046872~metal ion binding	4	0.732601	0.00667994	SDHB, CYCS, UQCRFS1, COX5A	5	2069	16881	6.52721	0.131293	0.0458329	5.0435
GOTERM_BP_DIRECT	GO:1902600~hydrogen ion transmembrane transport	2	0.3663	0.014453	UQCRFS1, COX5A	5	61	16792	110.111	0.44141	0.176435	12.4707
GOTERM_CC_DIRECT	GO:0005739~mitochondrion	3	0.549451	0.0289577	SDHB, CYCS, UQCRFS1	5	1331	18224	8.21518	0.506013	0.297158	21.0002
GOTERM_CC_DIRECT	GO:0043209~myelin sheath	2	0.3663	0.0329502	UQCRFS1, COX5A	5	152	18224	47.9579	0.552521	0.235125	23.5685
Table S5.2: PPI subnetwork2
Category	Term	Count	%	PValue	Genes	List Total	Pop Hits	Pop Total	Fold Enrichment	Bonferroni	Benjamini	FDR
GOTERM_BP_DIRECT	GO:0000398~mRNA splicing, via spliceosome	10	0.430663	2.22139e-15	PCF11, SRRM2, NUDT21, CDC40, SNRPB, SRRM1, LSM3, SNRNP70, BUD31, TXNL4A	13	222	16792	58.1843	1.06581e-13	1.06581e-13	2.12053e-12
GOTERM_BP_DIRECT	GO:0006369~termination of RNA polymerase II transcription	5	0.215332	9.28212e-08	PCF11, NUDT21, CDC40, SNRPB, SRRM1	13	64	16792	100.913	4.45541e-06	2.22771e-06	8.85846e-05
GOTERM_CC_DIRECT	GO:0071013~catalytic step 2 spliceosome	5	0.215332	2.9187e-07	SRRM2, CDC40, SNRPB, SRRM1, LSM3	13	92	18224	76.1873	1.16747e-05	1.16747e-05	0.000267033
GOTERM_CC_DIRECT	GO:0005681~spliceosomal complex	5	0.215332	3.18319e-07	CDC40, SNRPB, SNRNP70, BUD31, TXNL4A	13	94	18224	74.5663	1.27327e-05	6.36636e-06	0.000291231
GOTERM_MF_DIRECT	GO:0044822~poly(A) RNA binding	8	0.344531	3.45407e-06	SRRM2, NUDT21, CDC40, SNRPB, SRRM1, LSM3, SNRNP70, SRPK1	13	1129	16881	9.20134	0.000107071	0.000107071	0.0029673
GOTERM_BP_DIRECT	GO:0008380~RNA splicing	5	0.215332	4.28622e-06	CDC40, SNRPB, SRRM1, SNRNP70, SRPK1	13	166	16792	38.9064	0.000205718	6.85774e-05	0.00409052
GOTERM_BP_DIRECT	GO:0031124~mRNA 3'-end processing	4	0.172265	5.36276e-06	PCF11, NUDT21, CDC40, SRRM1	13	50	16792	103.335	0.00025738	6.43512e-05	0.00511787
GOTERM_BP_DIRECT	GO:0006397~mRNA processing	5	0.215332	5.78157e-06	NUDT21, SRRM1, LSM3, SNRNP70, SRPK1	13	179	16792	36.0808	0.000277477	5.55016e-05	0.00551755
GOTERM_CC_DIRECT	GO:0005654~nucleoplasm	10	0.430663	6.33981e-06	PCF11, SRRM2, NUDT21, WDR77, CDC40, SNRPB, SRRM1, LSM3, SNRNP70, TXNL4A	13	2784	18224	5.03537	0.000253561	8.45275e-05	0.00580017
GOTERM_CC_DIRECT	GO:0046540~U4/U6 x U5 tri-snRNP complex	3	0.129199	9.97915e-05	SNRPB, LSM3, TXNL4A	13	23	18224	182.849	0.0039839	0.000997467	0.0912625
GOTERM_BP_DIRECT	GO:0000387~spliceosomal snRNP assembly	3	0.129199	0.000175147	SNUPN, WDR77, SNRPB	13	28	16792	138.396	0.00837254	0.00140032	0.167028
GOTERM_CC_DIRECT	GO:0005634~nucleus	10	0.430663	0.00156263	SNUPN, NUDT21, WDR77, SNRPB, SRRM1, LSM3, SNRNP70, BUD31, SRPK1, TXNL4A	13	5415	18224	2.58882	0.0606376	0.0124329	1.42058
GOTERM_MF_DIRECT	GO:0003729~mRNA binding	3	0.129199	0.00341987	PCF11, NUDT21, SNRNP70	13	125	16881	31.1649	0.100753	0.0517137	2.90011
GOTERM_CC_DIRECT	GO:0005849~mRNA cleavage factor complex	2	0.0861326	0.00328839	PCF11, NUDT21	13	5	18224	560.738	0.123442	0.0217194	2.96856
GOTERM_MF_DIRECT	GO:0003723~RNA binding	4	0.172265	0.00598226	NUDT21, SNRPB, LSM3, SNRNP70	13	547	16881	9.49571	0.169732	0.0601193	5.0241
GOTERM_CC_DIRECT	GO:0016607~nuclear speck	3	0.129199	0.00742844	SRRM2, SRRM1, SNRNP70	13	201	18224	20.9231	0.257882	0.0417118	6.5942
GOTERM_CC_DIRECT	GO:0034709~methylosome	2	0.0861326	0.00787548	WDR77, SNRPB	13	12	18224	233.641	0.271135	0.038762	6.97838
GOTERM_CC_DIRECT	GO:0005682~U5 snRNP	2	0.0861326	0.0111401	SNRPB, TXNL4A	13	17	18224	164.923	0.361163	0.0485703	9.74158
GOTERM_CC_DIRECT	GO:0071004~U2-type prespliceosome	2	0.0861326	0.0111401	SNRPB, SNRNP70	13	17	18224	164.923	0.361163	0.0485703	9.74158
GOTERM_CC_DIRECT	GO:0005685~U1 snRNP	2	0.0861326	0.0124432	SNRPB, SNRNP70	13	19	18224	147.563	0.393985	0.0488515	10.8239
GOTERM_BP_DIRECT	GO:0051170~nuclear import	2	0.0861326	0.0127919	SNUPN, SNRPB	13	18	16792	143.521	0.460963	0.0844969	11.5619
GOTERM_CC_DIRECT	GO:0071011~precatalytic spliceosome	2	0.0861326	0.0163431	LSM3, SNRNP70	13	25	18224	112.148	0.482695	0.0581604	13.9945
GOTERM_CC_DIRECT	GO:0019013~viral nucleocapsid	2	0.0861326	0.0182877	SNRPB, SNRNP70	13	28	18224	100.132	0.522064	0.0596689	15.5376
GOTERM_BP_DIRECT	GO:0000375~RNA splicing, via transesterification reactions	2	0.0861326	0.0177258	SRRM1, TXNL4A	13	25	16792	103.335	0.576191	0.101752	15.6913
GOTERM_BP_DIRECT	GO:0006378~mRNA polyadenylation	2	0.0861326	0.0198335	PCF11, NUDT21	13	28	16792	92.2637	0.617709	0.101332	17.402
GOTERM_MF_DIRECT	GO:0030374~ligand-dependent nuclear receptor transcription coactivator activity	2	0.0861326	0.0356688	WDR77, BUD31	13	51	16881	50.9231	0.675651	0.245337	26.8036
GOTERM_BP_DIRECT	GO:0006405~RNA export from nucleus	2	0.0861326	0.0386165	CDC40, SRRM1	13	55	16792	46.9706	0.848978	0.172241	31.329
GOTERM_CC_DIRECT	GO:0016363~nuclear matrix	2	0.0861326	0.062053	SRRM1, SRPK1	13	97	18224	28.904	0.922886	0.178902	44.3509
GOTERM_BP_DIRECT	GO:0006406~mRNA export from nucleus	2	0.0861326	0.0691897	CDC40, SRRM1	13	100	16792	25.8338	0.967986	0.268656	49.5543
GOTERM_MF_DIRECT	GO:0005515~protein binding	10	0.430663	0.0947368	NUDT21, WDR77, CDC40, SNRPB, SRRM1, LSM3, SNRNP70, BUD31, SRPK1, TXNL4A	13	8785	16881	1.47813	0.954289	0.460484	57.4735
Table S5.3: PPI subnetwork 3
Category	Term	Count	%	PValue	Genes	List Total	Pop Hits	Pop Total	Fold Enrichment	Bonferroni	Benjamini	FDR
GOTERM_CC_DIRECT	GO:0005753~mitochondrial proton-transporting ATP synthase complex	4	0.299625	2.63153e-08	ATP5F1, ATP5A1, ATP5G3, ATP5J	7	21	18224	495.891	6.31566e-07	6.31566e-07	2.11097e-05
GOTERM_BP_DIRECT	GO:0042776~mitochondrial ATP synthesis coupled proton transport	4	0.299625	3.36322e-08	ATP5F1, ATP5A1, ATP5G3, ATP5J	7	21	16792	456.925	9.08069e-07	9.08069e-07	2.78637e-05
GOTERM_BP_DIRECT	GO:0015986~ATP synthesis coupled proton transport	4	0.299625	3.89373e-08	ATP5F1, ATP5A1, ATP5G3, ATP5J	7	22	16792	436.156	1.05131e-06	5.25654e-07	3.22589e-05
GOTERM_BP_DIRECT	GO:0006754~ATP biosynthetic process	4	0.299625	9.23009e-08	ATP5F1, ATP5A1, ATP5G3, ATP5J	7	29	16792	330.877	2.49212e-06	8.30708e-07	7.64697e-05
GOTERM_MF_DIRECT	GO:0015078~hydrogen ion transmembrane transporter activity	4	0.299625	1.23272e-07	ATP5F1, ATP5G3, ATP6V0B, ATP5J	7	32	16881	301.446	1.84908e-06	1.84908e-06	8.57062e-05
GOTERM_CC_DIRECT	GO:0005743~mitochondrial inner membrane	5	0.374532	4.88279e-06	NDUFB5, NDUFS4, ATP5F1, ATP5A1, ATP5J	7	441	18224	29.5173	0.00011718	5.85919e-05	0.00391684
GOTERM_CC_DIRECT	GO:0000276~mitochondrial proton-transporting ATP synthase complex, coupling factor F(o)	3	0.224719	5.95341e-06	ATP5F1, ATP5G3, ATP5J	7	12	18224	650.857	0.000142872	4.76263e-05	0.00477565
GOTERM_MF_DIRECT	GO:0046933~proton-transporting ATP synthase activity, rotational mechanism	3	0.224719	1.42843e-05	ATP5F1, ATP5A1, ATP5G3	7	17	16881	425.571	0.000214244	0.000107128	0.0099309
GOTERM_BP_DIRECT	GO:0015991~ATP hydrolysis coupled proton transport	3	0.224719	5.25235e-05	ATP5A1, ATP5G3, ATP6V0B	7	32	16792	224.893	0.00141717	0.00035448	0.0435065
GOTERM_MF_DIRECT	GO:0022857~transmembrane transporter activity	3	0.224719	0.000122894	ATP5F1, ATP5A1, ATP5J	7	49	16881	147.647	0.00184183	0.00061432	0.085412
GOTERM_CC_DIRECT	GO:0005739~mitochondrion	5	0.374532	0.000376996	NDUFB5, NDUFS4, ATP5F1, ATP5A1, ATP5J	7	1331	18224	9.77997	0.00900879	0.00225985	0.302021
GOTERM_MF_DIRECT	GO:0016887~ATPase activity	3	0.224719	0.00170371	ATP5F1, ATP5A1, ATP5J	7	183	16881	39.534	0.0252531	0.00637396	1.17853
GOTERM_MF_DIRECT	GO:0005215~transporter activity	3	0.224719	0.00207067	ATP5G3, ATP6V0B, ATP5J	7	202	16881	35.8154	0.0306138	0.00619915	1.43081
GOTERM_MF_DIRECT	GO:0046961~proton-transporting ATPase activity, rotational mechanism	2	0.149813	0.00920701	ATP5A1, ATP6V0B	7	26	16881	185.505	0.12955	0.0228588	6.22849
GOTERM_MF_DIRECT	GO:0008137~NADH dehydrogenase (ubiquinone) activity	2	0.149813	0.0169423	NDUFB5, NDUFS4	7	48	16881	100.482	0.226099	0.0359537	11.2016
GOTERM_CC_DIRECT	GO:0005747~mitochondrial respiratory chain complex I	2	0.149813	0.0160267	NDUFB5, NDUFS4	7	49	18224	106.262	0.321422	0.0746204	12.1558
GOTERM_BP_DIRECT	GO:0006120~mitochondrial electron transport, NADH to ubiquinone	2	0.149813	0.0173837	NDUFB5, NDUFS4	7	49	16792	97.9125	0.377173	0.0903518	13.5226
GOTERM_BP_DIRECT	GO:0021762~substantia nigra development	2	0.149813	0.0173837	ATP5F1, ATP5J	7	49	16792	97.9125	0.377173	0.0903518	13.5226
GOTERM_BP_DIRECT	GO:0032981~mitochondrial respiratory chain complex I assembly	2	0.149813	0.0223039	NDUFB5, NDUFS4	7	63	16792	76.1542	0.456118	0.0965223	17.0453
GOTERM_CC_DIRECT	GO:0043209~myelin sheath	2	0.149813	0.0490185	ATP5F1, ATP5A1	7	152	18224	34.2556	0.700684	0.182123	33.1811
Table S5.4: PPI subnetwork 4
Category	Term	Count	%	PValue	Genes	List Total	Pop Hits	Pop Total	Fold Enrichment	Bonferroni	Benjamini	FDR
GOTERM_BP_DIRECT	GO:0006635~fatty acid beta-oxidation	4	0.306044	3.33874e-07	PEX5, HSD17B4, ACAT2, HADHB	7	44	16792	218.078	1.96984e-05	1.96984e-05	0.0003334
GOTERM_CC_DIRECT	GO:0005739~mitochondrion	6	0.459067	1.16311e-05	MCAT, PEX5, HSD17B4, ACACB, ACAT2, HADHB	7	1331	18224	11.736	0.000244225	0.000244225	0.00898046
GOTERM_MF_DIRECT	GO:0003857~3-hydroxyacyl-CoA dehydrogenase activity	2	0.153022	0.00284049	HSD17B4, HADHB	7	8	16881	602.893	0.139946	0.139946	2.73711
GOTERM_BP_DIRECT	GO:0000038~very long-chain fatty acid metabolic process	2	0.153022	0.00499271	PEX5, HSD17B4	7	14	16792	342.694	0.255697	0.13727	4.87527
GOTERM_MF_DIRECT	GO:0016853~isomerase activity	2	0.153022	0.00744194	HMGCS1, HSD17B4	7	21	16881	229.673	0.326924	0.179588	7.02865
GOTERM_CC_DIRECT	GO:0005782~peroxisomal matrix	2	0.153022	0.0150517	PEX5, HSD17B4	7	46	18224	113.193	0.272752	0.147212	11.0506
GOTERM_CC_DIRECT	GO:0005778~peroxisomal membrane	2	0.153022	0.01765	PEX5, HSD17B4	7	54	18224	96.4233	0.311995	0.117197	12.8465
GOTERM_BP_DIRECT	GO:0006633~fatty acid biosynthetic process	2	0.153022	0.0184397	MCAT, ACACB	7	52	16792	92.2637	0.666496	0.306521	16.9606
GOTERM_CC_DIRECT	GO:0005777~peroxisome	2	0.153022	0.0337603	PEX5, HSD17B4	7	104	18224	50.0659	0.513837	0.164983	23.293
GOTERM_CC_DIRECT	GO:0005741~mitochondrial outer membrane	2	0.153022	0.0480708	ACACB, HADHB	7	149	18224	34.9453	0.644616	0.186908	31.6405
GOTERM_BP_DIRECT	GO:0006629~lipid metabolic process	2	0.153022	0.0548111	HMGCS1, ACAT2	7	157	16792	30.5587	0.964058	0.564589	43.0448
GOTERM_BP_DIRECT	GO:0008152~metabolic process	2	0.153022	0.0585555	MCAT, HADHB	7	168	16792	28.5578	0.971563	0.509344	45.2583
Table S5.5: PPI subnetwork 5
Category	Term	Count	%	PValue	Genes	List Total	Pop Hits	Pop Total	Fold Enrichment	Bonferroni	Benjamini	FDR
GOTERM_CC_DIRECT	GO:0005759~mitochondrial matrix	6	0.522648	1.80475e-09	PDK3, PDK4, IDH3B, DLAT, OGDH, PDHB	6	327	18224	55.7309	2.16569e-08	2.16569e-08	1.16111e-06
GOTERM_BP_DIRECT	GO:0010510~regulation of acetyl-CoA biosynthetic process from pyruvate	4	0.348432	2.78609e-09	PDK3, PDK4, DLAT, PDHB	6	12	16792	932.889	1.17016e-07	1.17016e-07	2.57852e-06
GOTERM_BP_DIRECT	GO:0006099~tricarboxylic acid cycle	4	0.348432	4.62041e-08	IDH3B, DLAT, OGDH, PDHB	6	29	16792	386.023	1.94057e-06	9.70286e-07	4.27618e-05
GOTERM_BP_DIRECT	GO:0006006~glucose metabolic process	4	0.348432	6.03692e-07	PDK3, PDK4, DLAT, PDHB	6	67	16792	167.085	2.53548e-05	8.45166e-06	0.000558715
GOTERM_CC_DIRECT	GO:0005739~mitochondrion	6	0.522648	2.06369e-06	PDK3, PDK4, IDH3B, DLAT, OGDH, PDHB	6	1331	18224	13.692	2.47639e-05	1.2382e-05	0.0013277
GOTERM_BP_DIRECT	GO:0046487~glyoxylate metabolic process	3	0.261324	2.29875e-05	DLAT, OGDH, PDHB	6	26	16792	322.923	0.000965021	0.000241343	0.0212729
GOTERM_MF_DIRECT	GO:0004740~pyruvate dehydrogenase (acetyl-transferring) kinase activity	2	0.174216	0.00118434	PDK3, PDK4	6	4	16881	1406.75	0.0234222	0.0234222	0.897873
GOTERM_CC_DIRECT	GO:0045254~pyruvate dehydrogenase complex	2	0.174216	0.00164528	DLAT, PDHB	6	6	18224	1012.44	0.0195657	0.00656489	1.0538
GOTERM_MF_DIRECT	GO:0034604~pyruvate dehydrogenase (NAD+) activity	2	0.174216	0.00236756	DLAT, PDHB	6	8	16881	703.375	0.0463012	0.023425	1.78789
GOTERM_BP_DIRECT	GO:0006734~NADH metabolic process	2	0.174216	0.00208284	IDH3B, OGDH	6	7	16792	799.619	0.0838456	0.0173616	1.91117
GOTERM_BP_DIRECT	GO:0006086~acetyl-CoA biosynthetic process from pyruvate	2	0.174216	0.00208284	DLAT, PDHB	6	7	16792	799.619	0.0838456	0.0173616	1.91117
GOTERM_BP_DIRECT	GO:0006103~2-oxoglutarate metabolic process	2	0.174216	0.00534885	IDH3B, OGDH	6	18	16792	310.963	0.201687	0.0368465	4.84247
GOTERM_BP_DIRECT	GO:0010906~regulation of glucose metabolic process	2	0.174216	0.00653437	PDK3, PDK4	6	22	16792	254.424	0.240689	0.0385713	5.887
GOTERM_BP_DIRECT	GO:0006090~pyruvate metabolic process	2	0.174216	0.00653437	DLAT, PDHB	6	22	16792	254.424	0.240689	0.0385713	5.887
GOTERM_BP_DIRECT	GO:0071398~cellular response to fatty acid	2	0.174216	0.00683058	PDK3, PDK4	6	23	16792	243.362	0.25014	0.0353438	6.14637
