# Supplementary material for: Re-exploring the core genes and modules in the human frontal cortex during chronological aging: insights from network-based analysis of transcriptomic studies
Source: Aging (Albany NY). 2018 Oct 20;10(10):2816–31. doi: 10.18632/aging.101589 (PMC6224233; doi:10.18632/aging.101589)
Supplement: Table S6 [file aging-10-101589-s006.xlsx]

## Sheet: 工作表1
Table S6: GenAge enrichment analyses of identified co-expressed PPI modules
GenAge
human: 307 genes; 48 in compendium
				In module
				YES	NO	TOT
		In GenAge	YES	x11	x12	48
		humans list?	NO	x21	x22	1212
			TOT			1260
	Enrichment GenAge Human List
	Counts				Fisher's Exact Test
	x11	x12	x21	x22	p	OR	95% CI
Module 1	8	40	21	1191	0	11.343	4.737-27.159
PRKCD
NFKBIA
YWHAZ
BCL2
EGR1
MAPK8
HRAS
MAPK3
Module 2	1	47	22	1190	0.594	1.151	0.152-8.72
CDC42
Module 3	2	46	20	1192	0.203	2.591	0.588-11.419
SUMO1
HDAC1
Module 6	1	47	11	1201	0.374	2.323	0.294-18.368
CNR1
Module 7	1	47	10	1202	0.349	2.557	0.321-20.393
PTK2
Module 8	1	47	9	1203	0.305	2.844	0.353-22.911
FGFR1
Module 16	2	46	4	1208	0.019	13.13	2.345-73.527
LRP2
CLU
SUBNETWORK1	35	13	338	874	0	4.572	2.385-8.764
IGF1
PRKCD
LRP2
PDGFRA
NFKBIA
PTK2
CNR1
YWHAZ
PIN1
FGFR1
INSR
BCL2
HTRA2
PTK2B
EGR1
SUMO1
FOXO4
MAPK8
CDC42
SP1
MAP3K5
STAT3
CDKN1A
TXN
HIF1A
CLU
NFKB1
PDGFRB
GSR
PPP1CA
SOCS2
BRCA1
HRAS
HDAC1
MAPK3
